# Supplementary material for: Dopaminergic regulation of vestibulo-cerebellar circuits through unipolar brush cells
Source: eLife. 2022 Apr 27;11:e76912. doi: 10.7554/eLife.76912 (PMC9106328; doi:10.7554/eLife.76912)
Supplement: Figure 7—figure supplement 1—source data 1. [file elife-76912-fig7-figsupp1-data1.xlsx]

## Sheet: Fig 7 H
IPSC traces (pA)		Cell
	Time (Seconds) 20 kHz sampling		1	2	3	4	5
	5e-05		-22.3592	-11.6278	-23.4549	-23.8739	-16.3329
	0.0001		-22.3592	-11.7889	-23.3905	-23.8739	-16.3329
	0.00015		-22.3592	-11.7889	-23.326	-23.8739	-16.3329
	0.0002		-22.4559	-11.6278	-23.2938	-23.8739	-16.3329
	0.00025		-22.5526	-11.6278	-23.2293	-23.8094	-16.3329
	0.0003		-22.4559	-11.6278	-23.2293	-23.745	-16.4295
	0.00035		-22.4559	-11.6278	-23.2293	-23.2616	-16.5585
	0.0004		-22.4559	-11.6278	-23.2293	-23.2616	-16.5585
	0.00045		-22.3915	-11.6278	-23.2938	-23.2616	-16.5585
	0.0005		-22.3915	-11.6278	-23.326	-23.2616	-16.5585
	0.00055		-22.3915	-11.66	-23.2938	-23.2616	-16.5585
	0.0006		-22.5526	-11.7889	-23.2938	-23.2616	-16.5585
	0.00065		-22.5526	-11.7889	-23.2938	-23.2616	-16.494
	0.0007		-22.6493	-11.7889	-23.326	-23.2616	-16.494
	0.00075		-22.6815	-11.8212	-23.326	-23.2616	-16.3329
	0.0008		-22.6815	-11.8856	-23.326	-23.2616	-16.3329
	0.00085		-22.6815	-11.8856	-23.326	-23.7772	-16.3329
	0.0009		-22.6815	-11.8856	-23.326	-24.2606	-16.1395
	0.00095		-22.6815	-11.7889	-23.326	-24.2606	-15.785
	0.001		-22.6815	-11.7889	-23.2938	-24.2606	-15.785
	0.00105		-22.7459	-11.7889	-23.2938	-24.2606	-15.785
	0.0011		-22.7459	-11.66	-23.2938	-24.2606	-15.785
	0.00115		-22.7459	-11.66	-23.326	-24.2606	-15.785
	0.0012		-22.7782	-11.66	-23.326	-24.2606	-16.1395
	0.00125		-22.7782	-11.66	-23.326	-24.2606	-16.3006
	0.0013		-22.7137	-11.66	-23.3905	-24.2606	-16.3006
	0.00135		-22.7137	-11.66	-23.3905	-24.325	-16.3006
	0.0014		-22.7137	-11.66	-23.3905	-24.325	-16.3006
	0.00145		-22.7137	-11.66	-23.3905	-24.325	-16.3006
	0.0015		-22.7137	-11.66	-23.3905	-24.2606	-16.3006
	0.00155		-22.7137	-11.7889	-23.4227	-24.2606	-16.3006
	0.0016		-22.6815	-11.8856	-23.3582	-24.2606	-16.3006
	0.00165		-22.6493	-11.8856	-23.4227	-24.2606	-16.3006
	0.0017		-22.5526	-11.8856	-23.5194	-24.2606	-16.1395
	0.00175		-22.5526	-11.8856	-23.6483	-24.2606	-16.1395
	0.0018		-22.6493	-11.8856	-23.6483	-24.325	-16.1395
	0.00185		-22.6493	-11.7889	-23.6483	-23.9061	-16.1395
	0.0019		-22.6493	-11.66	-23.6483	-23.9061	-16.1395
	0.00195		-22.6493	-11.66	-23.6483	-23.9061	-16.1395
	0.002		-22.6493	-11.66	-23.7127	-23.9061	-16.1395
	0.00205		-22.7137	-11.66	-23.7127	-23.9061	-16.1395
	0.0021		-22.7782	-11.66	-23.6483	-23.9061	-16.1395
	0.00215		-22.7782	-11.5633	-23.5194	-23.9061	-16.1073
	0.0022		-22.7782	-11.5311	-23.5194	-23.9061	-15.8817
	0.00225		-22.7782	-11.5311	-23.4227	-23.9061	-15.6561
	0.0023		-22.7782	-11.4989	-23.3582	-23.9061	-15.5272
	0.00235		-22.7782	-11.4989	-23.3582	-23.9061	-15.5272
	0.0024		-22.7782	-11.4989	-23.4227	-23.9061	-15.5272
	0.00245		-22.7782	-11.4989	-23.5194	-23.9061	-15.5272
	0.0025		-22.7782	-11.4989	-23.5194	-23.9061	-15.5272
	0.00255		-22.7782	-11.4989	-23.4872	-23.9061	-15.4305
	0.0026		-22.7782	-11.5311	-23.4872	-23.9061	-15.4305
	0.00265		-22.7782	-11.4989	-23.6483	-23.9061	-15.5272
	0.0027		-22.8104	-11.4989	-23.7772	-23.3582	-15.5272
	0.00275		-22.8104	-11.4667	-23.6483	-23.326	-15.5272
	0.0028		-22.8104	-11.4989	-23.6483	-23.326	-15.5272
	0.00285		-22.8104	-11.4989	-23.6483	-23.326	-15.5272
	0.0029		-22.8104	-11.4667	-23.7772	-23.326	-15.6561
	0.00295		-22.8104	-11.4667	-23.9706	-23.2938	-15.6561
	0.003		-22.8104	-11.4667	-23.9706	-23.2938	-15.5272
	0.00305		-22.8104	-11.37	-23.9706	-23.2938	-15.5272
	0.0031		-22.8104	-11.2411	-23.9706	-23.2938	-15.5272
	0.00315		-22.9393	-11.2411	-23.9706	-23.2938	-15.5272
	0.0032		-22.9393	-11.2411	-23.9706	-23.2938	-15.5272
	0.00325		-22.9393	-11.2411	-23.9706	-23.2938	-15.6561
	0.0033		-22.9393	-11.2411	-23.9706	-23.2938	-15.8172
	0.00335		-22.9393	-11.2411	-23.9706	-23.036	-15.8817
	0.0034		-22.9393	-11.37	-23.9706	-23.036	-15.8817
	0.00345		-22.9393	-11.2411	-23.9706	-23.036	-15.8817
	0.0035		-23.1004	-11.1444	-23.9706	-23.036	-15.8817
	0.00355		-23.1004	-11.1444	-24.0672	-23.036	-15.8817
	0.0036		-23.1971	-11.0155	-24.1639	-23.036	-15.8817
	0.00365		-23.1971	-11.0155	-24.2284	-23.036	-15.8817
	0.0037		-23.1971	-11.0155	-24.2284	-23.036	-15.9461
	0.00375		-23.1971	-11.0155	-24.2284	-23.036	-15.9461
	0.0038		-23.1004	-11.1444	-24.2284	-23.036	-15.8817
	0.00385		-23.0682	-11.1766	-24.2928	-23.036	-15.8172
	0.0039		-22.9393	-11.1766	-24.2928	-23.036	-15.6561
	0.00395		-22.9393	-11.1766	-24.2928	-23.036	-15.5272
	0.004		-22.9393	-11.1766	-24.2928	-23.036	-15.5272
	0.00405		-22.9393	-11.1766	-24.2928	-23.036	-15.5272
	0.0041		-22.9393	-11.3378	-24.2928	-23.036	-15.5272
	0.00415		-22.9393	-11.4022	-24.2928	-23.036	-15.5272
	0.0042		-22.9393	-11.4022	-24.2928	-23.036	-15.5272
	0.00425		-22.9393	-11.4022	-24.2928	-23.036	-15.5272
	0.0043		-22.9393	-11.4344	-24.2928	-23.036	-15.4305
	0.00435		-22.9393	-11.4344	-24.2928	-22.9393	-15.4305
	0.0044		-22.9393	-11.4344	-24.2928	-22.9393	-15.4305
	0.00445		-22.9393	-11.4344	-24.2928	-22.9393	-15.4305
	0.0045		-22.9393	-11.4344	-24.2928	-22.9393	-15.4305
	0.00455		-22.9393	-11.4667	-24.2928	-22.9393	-15.4305
	0.0046		-22.9393	-11.4667	-24.1317	-22.9393	-15.4305
	0.00465		-23.1004	-11.4667	-24.1961	-22.9393	-15.4305
	0.0047		-23.1971	-11.4344	-23.9061	-22.9393	-15.4305
	0.00475		-23.2616	-11.4022	-23.7127	-22.9393	-15.4305
	0.0048		-23.2616	-11.3378	-23.7127	-22.7782	-15.5272
	0.00485		-23.2616	-11.2411	-23.7127	-22.9393	-15.5272
	0.0049		-23.2616	-11.2411	-23.7127	-23.036	-15.5272
	0.00495		-23.2616	-11.2411	-23.7127	-23.1327	-15.5272
	0.005		-23.2616	-11.2411	-23.6161	-23.1327	-15.5272
	0.00505		-23.2616	-11.2411	-23.5838	-23.1327	-15.5272
	0.0051		-23.1649	-11.2411	-23.5838	-23.1327	-15.5272
	0.00515		-22.9393	-11.2411	-23.5838	-23.1327	-15.5272
	0.0052		-22.8104	-11.3378	-23.6161	-23.1327	-15.5272
	0.00525		-22.8104	-11.4022	-23.6161	-23.1327	-15.5272
	0.0053		-22.8104	-11.4022	-23.6161	-23.1327	-15.4305
	0.00535		-22.8104	-11.4022	-23.6161	-23.2616	-15.3338
	0.0054		-22.8104	-11.4022	-23.6161	-23.2616	-15.3338
	0.00545		-22.8104	-11.4022	-23.5838	-23.2616	-15.3338
	0.0055		-22.8104	-11.4022	-23.5516	-23.2616	-15.3338
	0.00555		-22.9393	-11.4022	-23.5516	-23.2616	-15.3338
	0.0056		-22.8104	-11.3378	-23.4549	-23.2616	-15.3338
	0.00565		-22.8104	-11.2411	-23.4549	-23.2616	-15.4305
	0.0057		-22.7782	-11.2411	-23.4549	-23.2616	-15.5272
	0.00575		-22.7782	-11.2411	-23.4549	-23.1327	-15.5272
	0.0058		-22.7782	-11.2411	-23.4549	-23.1327	-15.5272
	0.00585		-22.7782	-11.2411	-23.4549	-23.1327	-15.5272
	0.0059		-22.7782	-11.2411	-23.3905	-23.1327	-15.6561
	0.00595		-22.7782	-11.2411	-23.3905	-23.036	-15.8172
	0.006		-22.7782	-11.2411	-23.4549	-23.036	-15.8172
	0.00605		-22.7137	-11.2411	-23.3905	-23.036	-15.8172
	0.0061		-22.617	-11.2411	-23.3905	-23.036	-15.8172
	0.00615		-22.4559	-11.2411	-23.3905	-23.036	-15.8172
	0.0062		-22.3592	-11.2411	-23.326	-23.036	-15.8172
	0.00625		-22.3592	-11.2411	-23.326	-23.036	-15.8172
	0.0063		-22.3592	-11.2411	-23.1971	-23.036	-15.8817
	0.00635		-22.3592	-11.2411	-23.1971	-23.036	-15.8817
	0.0064		-22.4559	-11.2411	-23.1971	-22.9393	-15.8817
	0.00645		-22.4559	-11.3378	-23.1971	-22.9393	-15.8817
	0.0065		-22.4559	-11.4022	-23.1971	-22.9393	-15.9461
	0.00655		-22.617	-11.4022	-23.1004	-22.9393	-15.9461
	0.0066		-22.7459	-11.3378	-23.0682	-22.9393	-15.9461
	0.00665		-22.8104	-11.3378	-22.9715	-22.9393	-15.9461
	0.0067		-22.8104	-11.2411	-22.8749	-22.9393	-15.9461
	0.00675		-22.9393	-11.1444	-22.8749	-22.9393	-15.9461
	0.0068		-22.8749	-11.1444	-22.8749	-22.9393	-15.9461
	0.00685		-22.8104	-11.2411	-22.8749	-22.9393	-15.9461
	0.0069		-22.8104	-11.3378	-22.8749	-22.9393	-15.9461
	0.00695		-22.7459	-11.3378	-22.8749	-22.9393	-15.8817
	0.007		-22.617	-11.3378	-22.8749	-22.9393	-15.8172
	0.00705		-22.4559	-11.3378	-22.8749	-22.9393	-15.8172
	0.0071		-22.3592	-11.2411	-22.8749	-22.9393	-15.8172
	0.00715		-22.3592	-11.2411	-23.036	-22.9393	-15.8172
	0.0072		-22.3592	-11.2411	-23.036	-22.9393	-15.8817
	0.00725		-22.4559	-11.2411	-23.036	-22.9393	-15.9461
	0.0073		-22.617	-11.2411	-23.1971	-22.9393	-16.0106
	0.00735		-22.617	-11.2411	-23.1971	-22.9393	-16.0106
	0.0074		-22.617	-11.2411	-22.9715	-22.9393	-16.0106
	0.00745		-22.7459	-11.2411	-22.7782	-22.9393	-16.0106
	0.0075		-22.8104	-11.2411	-22.7782	-22.9393	-16.0106
	0.00755		-22.8104	-11.2411	-22.8104	-22.9393	-16.0106
	0.0076		-22.8104	-11.2411	-22.8104	-22.9393	-15.9461
	0.00765		-22.8104	-11.3378	-22.8104	-22.9393	-15.8817
	0.0077		-22.7459	-11.3378	-22.8104	-23.036	-15.8817
	0.00775		-22.617	-11.3378	-22.8104	-23.036	-15.8817
	0.0078		-22.5526	-11.2411	-22.8104	-23.036	-15.8817
	0.00785		-22.4559	-11.2088	-22.8104	-23.1327	-15.8817
	0.0079		-22.4559	-11.1444	-22.8104	-23.1327	-15.8817
	0.00795		-22.3592	-11.2088	-22.8104	-23.1327	-15.9461
	0.008		-22.3592	-11.2088	-22.8104	-23.1327	-16.0106
	0.00805		-22.2948	-11.2088	-22.8104	-23.1327	-16.0106
	0.0081		-22.1659	-11.2411	-22.8104	-23.1327	-16.0106
	0.00815		-22.0692	-11.2088	-22.7782	-23.1649	-16.0106
	0.0082		-22.1659	-11.2088	-22.7782	-23.2616	-15.9461
	0.00825		-22.2948	-11.2088	-22.6815	-23.2616	-15.8817
	0.0083		-22.3592	-11.2088	-22.617	-23.3582	-15.8817
	0.00835		-22.3592	-11.2088	-22.617	-23.5194	-15.8495
	0.0084		-22.3592	-11.1444	-22.6815	-23.5194	-15.8495
	0.00845		-22.2948	-11.2088	-22.7782	-23.5194	-15.8495
	0.0085		-22.2948	-11.2088	-22.7782	-23.3582	-15.8495
	0.00855		-22.3592	-11.2411	-22.7782	-23.3582	-15.8495
	0.0086		-22.2948	-11.2411	-22.6815	-23.3582	-15.8495
	0.00865		-22.1659	-11.2088	-22.617	-23.3582	-15.9139
	0.0087		-22.1659	-11.2088	-22.5526	-23.3582	-15.8495
	0.00875		-22.1659	-11.2411	-22.5526	-23.3582	-15.8495
	0.0088		-22.1659	-11.2088	-22.5526	-23.2616	-15.9461
	0.00885		-22.2948	-11.2088	-22.5526	-23.2616	-16.3006
	0.0089		-22.3592	-11.2088	-22.5526	-23.3582	-16.6229
	0.00895		-22.3592	-11.2088	-22.5526	-23.5194	-16.6229
	0.009		-22.2948	-11.2088	-22.617	-23.745	-16.3006
	0.00905		-22.1659	-11.2088	-22.6815	-23.745	-16.1717
	0.0091		-22.0692	-11.1444	-22.6815	-23.745	-16.1717
	0.00915		-22.0047	-11.0477	-22.6815	-23.745	-16.1717
	0.0092		-21.9403	-11.0477	-22.6815	-23.8416	-16.1717
	0.00925		-21.8758	-11.0477	-22.6815	-23.8416	-16.4295
	0.0093		-21.8758	-11.0477	-22.6815	-23.9061	-16.4295
	0.00935		-21.8758	-11.0477	-22.6815	-24.1961	-16.4295
	0.0094		-21.8758	-11.0477	-22.6815	-24.1961	-16.4295
	0.00945		-21.9725	-11.0477	-22.617	-24.1961	-16.4295
	0.0095		-22.0692	-11.0477	-22.7137	-23.9061	-16.4295
	0.00955		-22.1659	-11.0477	-22.8104	-23.8416	-16.4295
	0.0096		-22.1659	-11.1444	-22.8104	-23.8416	-16.4295
	0.00965		-22.1659	-11.2088	-22.8104	-23.8416	-16.4295
	0.0097		-22.1659	-11.2411	-22.8426	-23.8416	-16.6229
	0.00975		-22.1659	-11.2411	-22.8749	-23.8416	-16.6874
	0.0098		-22.0692	-11.2733	-22.8749	-23.9061	-16.6874
	0.00985		-22.0692	-11.3055	-22.8749	-23.9061	-16.6874
	0.0099		-22.0692	-11.3055	-22.8749	-24.1961	-16.6229
	0.00995		-22.0692	-11.2733	-22.8749	-24.5506	-16.6229
	0.01		-22.0692	-11.2411	-22.9071	-24.6795	-16.4295
	0.01005		-22.0692	-11.2088	-22.9715	-24.6795	-16.4295
	0.0101		-22.0692	-11.1444	-22.9715	-24.6795	-16.4295
	0.01015		-22.1659	-11.0477	-22.9715	-24.6795	-16.4295
	0.0102		-22.2303	-11.0477	-22.9071	-24.6795	-16.4295
	0.01025		-22.2303	-11.0477	-22.9071	-24.6795	-16.4295
	0.0103		-22.2303	-11.0477	-22.9071	-24.6795	-16.4295
	0.01035		-22.2303	-11.1444	-22.9071	-24.6795	-16.4295
	0.0104		-22.2303	-11.2088	-22.9715	-24.6795	-16.4295
	0.01045		-22.2303	-11.2088	-23.0682	-24.325	-16.6229
	0.0105		-22.2303	-11.2088	-23.0682	-23.9061	-16.6229
	0.01055		-22.1659	-11.2088	-23.0682	-23.9061	-16.6229
	0.0106		-22.1336	-11.2088	-23.1327	-23.9061	-16.6229
	0.01065		-22.2303	-11.2411	-23.1327	-23.9061	-16.4295
	0.0107		-22.2948	-11.2411	-23.1327	-23.9061	-16.2684
	0.01075		-22.2303	-11.2411	-23.1327	-24.325	-16.2684
	0.0108		-22.2303	-11.2411	-23.1327	-24.6795	-16.2684
	0.01085		-22.2303	-11.2411	-23.1327	-24.5184	-16.2684
	0.0109		-22.2303	-11.2411	-23.1327	-24.1639	-16.2684
	0.01095		-22.2303	-11.3055	-23.1327	-24.1961	-16.2362
	0.011		-22.1336	-11.3055	-23.1327	-24.1961	-16.1717
	0.01105		-22.1336	-11.2411	-23.2293	-24.1961	-16.1073
	0.0111		-22.2303	-11.2411	-23.3582	-24.1961	-16.1073
	0.01115		-22.2948	-11.2088	-23.3582	-24.1961	-16.1073
	0.0112		-22.4559	-11.1122	-23.3582	-24.5184	-15.9784
	0.01125		-22.4559	-11.1122	-23.3582	-24.6795	-15.9784
	0.0113		-22.4559	-11.2088	-23.3582	-24.6795	-15.9139
	0.01135		-22.4559	-11.2411	-23.3582	-24.6795	-16.0428
	0.0114		-22.2948	-11.3055	-23.3582	-24.7118	-16.0428
	0.01145		-22.2948	-11.3055	-23.3582	-24.8084	-16.0428
	0.0115		-22.2948	-11.3055	-23.3582	-24.9051	-15.9139
	0.01155		-22.2303	-11.3055	-23.3905	-24.9051	-15.9139
	0.0116		-22.1336	-11.3378	-23.4227	-24.8084	-16.0428
	0.01165		-22.037	-11.3378	-23.4549	-24.7118	-16.1073
	0.0117		-21.9725	-11.4022	-23.5194	-24.7118	-16.1073
	0.01175		-21.9725	-11.4667	-23.5194	-24.6795	-16.0428
	0.0118		-21.9725	-11.4667	-23.4549	-24.6473	-15.9139
	0.01185		-22.037	-11.4667	-23.4549	-24.6473	-15.9139
	0.0119		-22.1336	-11.4667	-23.4549	-24.6473	-15.8495
	0.01195		-22.2303	-11.4022	-23.4227	-24.6473	-15.9139
	0.012		-22.2948	-11.3378	-23.4227	-24.6473	-16.0428
	0.01205		-22.4237	-11.3378	-23.4227	-24.6795	-16.0428
	0.0121		-22.4237	-11.3378	-23.5194	-24.7118	-16.0428
	0.01215		-22.4237	-11.4022	-23.4227	-24.8084	-16.0428
	0.0122		-22.2948	-11.4667	-23.3582	-24.8084	-15.9139
	0.01225		-22.2948	-11.4667	-23.3582	-24.8084	-15.8495
	0.0123		-22.2948	-11.4667	-23.2293	-24.8084	-15.8495
	0.01235		-22.2303	-11.4667	-23.2293	-24.8084	-15.8495
	0.0124		-22.2303	-11.4989	-23.2293	-24.8084	-15.8495
	0.01245		-22.1336	-11.5633	-23.3582	-24.8084	-15.8495
	0.0125		-22.037	-11.5956	-23.4227	-24.8084	-15.8495
	0.01255		-22.037	-11.6278	-23.4227	-24.7118	-15.8495
	0.0126		-22.037	-11.6278	-23.4227	-24.6795	-15.8495
	0.01265		-22.037	-11.5956	-23.4227	-24.6473	-15.9139
	0.0127		-22.1336	-11.5956	-23.5194	-24.6151	-16.0428
	0.01275		-22.2303	-11.6278	-23.5194	-24.4862	-16.0428
	0.0128		-22.2303	-11.6922	-23.5194	-24.4862	-16.0428
	0.01285		-22.2625	-11.7567	-23.5194	-24.4862	-16.0428
	0.0129		-22.2625	-11.8856	-23.6483	-24.4862	-16.0428
	0.01295		-22.3915	-11.9823	-23.5194	-24.4862	-15.9139
	0.013		-22.5204	-11.9823	-23.4227	-24.6151	-15.8495
	0.01305		-22.5204	-12.0467	-23.2616	-24.6473	-15.8495
	0.0131		-22.5204	-12.1112	-23.1004	-24.6795	-15.8495
	0.01315		-22.5526	-12.1112	-23.1004	-24.6795	-15.8495
	0.0132		-22.5204	-12.1112	-23.1004	-24.6473	-15.9139
	0.01325		-22.3915	-12.1112	-23.1004	-24.6473	-16.0428
	0.0133		-22.2625	-12.1112	-23.1004	-24.6151	-16.1073
	0.01335		-22.2625	-12.1112	-23.1004	-24.6151	-16.1073
	0.0134		-22.2625	-12.1112	-23.1004	-24.6151	-16.1073
	0.01345		-22.2625	-12.079	-23.1004	-24.6151	-16.1073
	0.0135		-22.2303	-12.1112	-23.2616	-24.6151	-16.1073
	0.01355		-22.1336	-12.1112	-23.4227	-24.6151	-16.1073
	0.0136		-22.1336	-12.1434	-23.4227	-24.6151	-16.1073
	0.01365		-22.1336	-12.2079	-23.5194	-24.6151	-16.1073
	0.0137		-22.037	-12.1434	-23.6483	-24.6151	-16.1395
	0.01375		-22.037	-12.1434	-23.8416	-24.4862	-16.204
	0.0138		-22.037	-12.2079	-23.8416	-24.4862	-16.204
	0.01385		-22.037	-12.2723	-23.745	-24.4862	-16.204
	0.0139		-22.037	-12.2079	-23.5838	-24.2284	-16.204
	0.01395		-22.037	-12.1434	-23.4227	-24.0672	-16.204
	0.014		-22.1336	-12.1112	-23.2293	-24.2284	-16.204
	0.01405		-22.2303	-12.1112	-23.036	-24.3573	-16.204
	0.0141		-22.2625	-12.1112	-23.036	-24.3573	-16.204
	0.01415		-22.3915	-12.1112	-23.036	-24.3573	-16.204
	0.0142		-22.3915	-12.1112	-23.036	-24.3573	-16.1717
	0.01425		-22.3915	-12.079	-23.036	-24.3573	-16.1717
	0.0143		-22.3915	-12.079	-23.036	-24.3573	-16.204
	0.01435		-22.3915	-12.1112	-23.036	-24.3573	-16.1717
	0.0144		-22.3915	-12.1434	-23.036	-24.3573	-16.1717
	0.01445		-22.2625	-12.2079	-23.036	-24.3573	-16.1717
	0.0145		-22.2625	-12.2079	-23.036	-24.3573	-16.204
	0.01455		-22.2303	-12.2079	-23.036	-24.3573	-16.204
	0.0146		-22.1336	-12.2723	-23.036	-24.2284	-16.204
	0.01465		-22.1336	-12.3046	-23.036	-24.0672	-16.2362
	0.0147		-22.037	-12.3046	-23.036	-24.035	-16.2362
	0.01475		-22.0047	-12.3046	-23.036	-23.9706	-16.2362
	0.0148		-22.0047	-12.2723	-23.036	-23.8739	-16.2362
	0.01485		-21.9403	-12.2079	-23.036	-23.8739	-16.2362
	0.0149		-21.9403	-12.2079	-22.9715	-23.7772	-16.2684
	0.01495		-21.9403	-12.2079	-22.8104	-23.7127	-16.2684
	0.015		-21.9403	-12.2079	-22.5848	-23.7127	-16.3329
	0.01505		-21.9403	-12.2079	-22.4881	-23.7772	-16.2684
	0.0151		-22.0047	-12.2079	-22.4881	-23.8416	-16.2362
	0.01515		-22.0047	-12.2079	-22.4881	-23.8416	-16.2362
	0.0152		-21.9403	-12.1434	-22.4881	-23.8416	-16.2362
	0.01525		-21.9403	-12.1434	-22.4881	-23.8739	-16.2684
	0.0153		-21.9403	-12.1112	-22.5848	-23.9706	-16.3329
	0.01535		-21.9403	-12.079	-22.7459	-24.035	-16.3329
	0.0154		-21.9403	-11.9178	-22.7459	-24.0672	-16.3329
	0.01545		-21.9403	-12.079	-22.7459	-24.2284	-16.3329
	0.0155		-21.8758	-12.1112	-22.7459	-24.3573	-16.3651
	0.01555		-21.9403	-12.1112	-22.8749	-24.2284	-16.3651
	0.0156		-21.9403	-12.1434	-22.8749	-24.2284	-16.3651
	0.01565		-21.9403	-12.2079	-22.8749	-24.0672	-16.3651
	0.0157		-21.9403	-12.2079	-22.8749	-24.035	-16.4295
	0.01575		-21.9081	-12.2079	-22.8749	-24.0028	-16.5585
	0.0158		-21.9081	-12.1434	-22.8749	-23.9383	-16.5585
	0.01585		-21.9081	-12.1434	-22.8749	-23.9383	-16.5585
	0.0159		-21.9081	-12.1434	-22.7459	-24.0028	-16.4295
	0.01595		-21.9081	-12.1434	-22.7459	-24.0028	-16.4295
	0.016		-22.0047	-12.1434	-22.5848	-24.0028	-16.4295
	0.01605		-22.1336	-12.1434	-22.4881	-24.0672	-16.5585
	0.0161		-22.1336	-12.1112	-22.4237	-24.0995	-16.5585
	0.01615		-22.1336	-12.1112	-22.4237	-24.2284	-16.4295
	0.0162		-22.0047	-12.1112	-22.4237	-24.0995	-16.5585
	0.01625		-22.0047	-12.1112	-22.4237	-24.0995	-16.4295
	0.0163		-22.0047	-12.1112	-22.4881	-24.0995	-16.4295
	0.01635		-22.0047	-12.1112	-22.4881	-24.0995	-16.4295
	0.0164		-22.0047	-12.1112	-22.4881	-24.0995	-16.4295
	0.01645		-22.0047	-12.1112	-22.5848	-24.0672	-16.4295
	0.0165		-22.0047	-12.1112	-22.7459	-24.0028	-16.4295
	0.01655		-22.0047	-12.1112	-22.7459	-23.9706	-16.4295
	0.0166		-22.1336	-12.1112	-22.5848	-23.9706	-16.4295
	0.01665		-22.2625	-12.079	-22.5848	-24.0028	-16.4295
	0.0167		-22.3592	-12.079	-22.5848	-24.0672	-16.4295
	0.01675		-22.3592	-11.9178	-22.5848	-24.0672	-16.4295
	0.0168		-22.3592	-11.7567	-22.4881	-24.0995	-16.5585
	0.01685		-22.3592	-11.7567	-22.4881	-24.0995	-16.6229
	0.0169		-22.3592	-11.7567	-22.4237	-24.0995	-16.6874
	0.01695		-22.3592	-11.9178	-22.4881	-24.0995	-16.6874
	0.017		-22.3592	-11.9178	-22.4881	-24.0995	-16.6874
	0.01705		-22.3592	-11.9178	-22.4881	-24.0995	-16.6874
	0.0171		-22.4237	-11.7567	-22.4881	-24.0672	-16.6229
	0.01715		-22.4237	-11.7245	-22.5848	-24.0028	-16.6229
	0.0172		-22.4237	-11.66	-22.5848	-24.0028	-16.6874
	0.01725		-22.3592	-11.66	-22.5848	-24.0672	-16.7518
	0.0173		-22.1336	-11.66	-22.7137	-24.0995	-16.784
	0.01735		-22.1336	-11.7245	-22.7782	-24.0995	-16.8485
	0.0174		-22.1336	-11.66	-22.7782	-24.0672	-16.8485
	0.01745		-22.1336	-11.66	-22.7137	-24.0672	-16.8485
	0.0175		-22.1336	-11.66	-22.5848	-24.035	-16.8485
	0.01755		-21.9081	-11.66	-22.5848	-24.035	-16.8807
	0.0176		-21.7791	-11.5633	-22.5848	-24.0672	-16.8807
	0.01765		-21.6825	-11.5633	-22.5848	-24.0995	-16.8807
	0.0177		-21.618	-11.5633	-22.5848	-24.0995	-16.8807
	0.01775		-21.618	-11.5633	-22.5848	-24.0995	-16.8807
	0.0178		-21.618	-11.5633	-22.5848	-24.0672	-16.8807
	0.01785		-21.618	-11.5633	-22.5848	-24.035	-16.8807
	0.0179		-21.618	-11.4022	-22.5848	-24.0672	-16.9452
	0.01795		-21.618	-11.2733	-22.5848	-24.0672	-16.9452
	0.018		-21.618	-11.2733	-22.5848	-24.035	-16.9452
	0.01805		-21.6825	-11.1444	-22.5848	-24.0028	-16.8807
	0.0181		-21.7469	-11.0477	-22.5848	-23.9706	-16.8485
	0.01815		-21.7469	-11.0477	-22.6815	-23.9706	-16.784
	0.0182		-21.7469	-11.0477	-22.6815	-23.9706	-16.784
	0.01825		-22.1336	-10.9833	-22.6815	-23.9706	-16.784
	0.0183		-22.1336	-10.9833	-22.6815	-24.0028	-16.784
	0.01835		-22.1336	-11.0799	-22.6815	-24.0028	-16.784
	0.0184		-22.1336	-11.1766	-22.6815	-24.0028	-16.784
	0.01845		-22.1336	-11.1766	-22.6815	-23.9706	-16.8485
	0.0185		-22.1336	-11.1766	-22.5848	-23.9706	-16.8807
	0.01855		-22.1336	-11.1766	-22.4559	-23.9706	-16.8807
	0.0186		-22.4237	-11.1766	-22.4559	-23.9061	-16.8807
	0.01865		-22.5204	-11.1766	-22.327	-23.8094	-16.8807
	0.0187		-22.6493	-11.2733	-22.1981	-23.745	-16.8485
	0.01875		-22.6493	-11.4022	-22.1659	-23.7127	-16.784
	0.0188		-22.6493	-11.4022	-22.1659	-23.7127	-16.7518
	0.01885		-22.6493	-11.2733	-22.1659	-23.7127	-16.7518
	0.0189		-22.6493	-11.2733	-22.1659	-23.7127	-16.7518
	0.01895		-22.6493	-11.2733	-22.1981	-23.7127	-16.7518
	0.019		-22.6493	-11.2733	-22.327	-23.7127	-16.7518
	0.01905		-22.6493	-11.2733	-22.4559	-23.7127	-16.7518
	0.0191		-22.5204	-11.4022	-22.5526	-23.7127	-16.7518
	0.01915		-22.4237	-11.4667	-22.6493	-23.7127	-16.6874
	0.0192		-22.4237	-11.5633	-22.6493	-23.7127	-16.6874
	0.01925		-22.4237	-11.66	-22.6493	-23.7127	-16.6229
	0.0193		-22.4237	-11.66	-22.6493	-23.7127	-16.5907
	0.01935		-22.4237	-11.66	-22.6493	-23.7127	-16.5907
	0.0194		-22.4237	-11.66	-22.6493	-23.7127	-16.5907
	0.01945		-22.4237	-11.66	-22.6493	-23.7127	-16.6229
	0.0195		-22.1336	-11.6922	-22.5526	-23.7127	-16.6229
	0.01955		-22.4237	-11.6922	-22.4559	-23.745	-16.6229
	0.0196		-22.5204	-11.66	-22.4559	-23.8094	-16.6874
	0.01965		-22.5204	-11.66	-22.4559	-23.9061	-16.6874
	0.0197		-22.6493	-11.66	-22.4559	-23.9061	-16.6874
	0.01975		-22.7459	-11.66	-22.4559	-23.9061	-16.6874
	0.0198		-22.8426	-11.66	-22.4559	-23.9061	-16.6874
	0.01985		-22.9715	-11.66	-22.4559	-23.9061	-16.6229
	0.0199		-22.9715	-11.66	-22.4559	-23.9061	-16.5907
	0.01995		-22.9715	-11.66	-22.5526	-23.9061	-16.5585
	0.02		-22.9715	-11.66	-22.6493	-23.9061	-16.4618
	0.02005		-23.1327	-11.6922	-22.7137	-23.8094	-16.5585
	0.0201		-23.2293	-11.7889	-22.7137	-23.745	-16.5907
	0.02015		-23.2938	-11.9823	-22.7137	-23.745	-16.5907
	0.0202		-23.2938	-11.9823	-22.7137	-23.8739	-16.6229
	0.02025		-23.2938	-11.9823	-22.7137	-23.745	-16.6229
	0.0203		-23.2938	-12.1756	-22.6493	-23.7127	-16.5907
	0.02035		-23.2938	-12.2723	-22.5526	-23.7127	-16.6229
	0.0204		-23.2938	-12.2723	-22.4559	-23.7127	-16.6874
	0.02045		-23.2938	-12.1756	-22.4559	-23.7127	-16.6874
	0.0205		-23.2938	-12.0467	-22.4559	-23.6805	-16.6874
	0.02055		-23.2938	-11.7889	-22.327	-23.6161	-16.784
	0.0206		-23.2938	-11.6922	-22.327	-23.5516	-16.8485
	0.02065		-23.326	-11.5633	-22.327	-23.5516	-16.8807
	0.0207		-23.326	-11.4667	-22.327	-23.5516	-16.8807
	0.02075		-23.5194	-11.4344	-22.327	-23.5516	-16.8807
	0.0208		-23.5194	-11.4344	-22.327	-23.5516	-16.8807
	0.02085		-23.5194	-11.4344	-22.327	-23.5194	-16.8807
	0.0209		-23.5194	-11.4344	-22.4237	-23.5194	-16.8807
	0.02095		-23.5194	-11.4344	-22.4237	-23.5194	-16.8807
	0.021		-23.5194	-11.4667	-22.4559	-23.5194	-16.8807
	0.02105		-23.5194	-11.4667	-22.5526	-23.5194	-16.8807
	0.0211		-23.326	-11.4667	-22.6493	-23.5194	-16.8807
	0.02115		-23.1649	-11.5633	-22.6493	-23.5194	-17.0096
	0.0212		-23.326	-11.6922	-22.6493	-23.5516	-17.0096
	0.02125		-23.326	-11.6922	-22.6493	-23.5516	-17.1385
	0.0213		-23.326	-11.7889	-22.6493	-23.5516	-17.1385
	0.02135		-23.326	-11.7889	-22.7137	-23.5516	-17.1385
	0.0214		-23.326	-11.7889	-22.7137	-23.5516	-17.1385
	0.02145		-23.326	-11.7889	-22.6493	-23.5516	-17.1708
	0.0215		-23.326	-11.7889	-22.5526	-23.5516	-17.2352
	0.02155		-23.326	-11.7889	-22.5526	-23.5516	-17.2352
	0.0216		-23.5194	-11.7889	-22.6493	-23.5516	-17.1708
	0.02165		-23.5194	-11.8856	-22.6493	-23.5194	-17.1385
	0.0217		-23.745	-11.8856	-22.5526	-23.4549	-17.1708
	0.02175		-23.745	-11.8856	-22.5526	-23.4549	-17.1708
	0.0218		-23.5194	-11.8856	-22.6493	-23.4549	-17.2352
	0.02185		-23.2293	-11.7889	-22.7137	-23.5194	-17.2352
	0.0219		-23.2293	-11.7889	-22.7459	-23.5516	-17.1708
	0.02195		-23.2293	-11.6922	-22.7459	-23.5194	-17.1708
	0.022		-23.2293	-11.6278	-22.7459	-23.5194	-17.1708
	0.02205		-23.0038	-11.6278	-22.7459	-23.5194	-17.1708
	0.0221		-22.9071	-11.6278	-22.7459	-23.5516	-17.2352
	0.02215		-22.8749	-11.7889	-22.7137	-23.5516	-17.2352
	0.0222		-22.8749	-11.8856	-22.7137	-23.6161	-17.1708
	0.02225		-22.8749	-11.8856	-22.7137	-23.6161	-17.2352
	0.0223		-22.9071	-11.7889	-22.6493	-23.5516	-17.2352
	0.02235		-22.9071	-11.7889	-22.5204	-23.4549	-17.2352
	0.0224		-22.9071	-11.8856	-22.5204	-23.4549	-17.2352
	0.02245		-22.9071	-11.9823	-22.5204	-23.4549	-17.2352
	0.0225		-22.9071	-11.9823	-22.5204	-23.4549	-17.2352
	0.02255		-22.9071	-11.8856	-22.5204	-23.4549	-17.0419
	0.0226		-23.0038	-11.8856	-22.4237	-23.3905	-16.8485
	0.02265		-23.2293	-11.9823	-22.327	-23.3905	-16.784
	0.0227		-23.5194	-11.9823	-22.327	-23.4549	-16.784
	0.02275		-23.5194	-11.9823	-22.327	-23.4549	-16.784
	0.0228		-23.5194	-11.8856	-22.327	-23.4549	-16.784
	0.02285		-23.5194	-11.7889	-22.1981	-23.5516	-16.784
	0.0229		-23.5194	-11.8856	-22.1336	-23.4549	-16.7518
	0.02295		-23.5194	-11.8856	-22.1659	-23.4549	-16.7518
	0.023		-23.2293	-11.8856	-22.1659	-23.4549	-16.784
	0.02305		-23.0038	-11.8856	-22.1659	-23.4549	-16.8485
	0.0231		-23.0038	-11.8856	-22.327	-23.4549	-16.8485
	0.02315		-22.9071	-11.9823	-22.327	-23.4549	-16.8807
	0.0232		-22.9071	-12.0467	-22.4237	-23.3905	-16.9774
	0.02325		-22.9071	-12.0467	-22.4237	-23.3582	-17.1385
	0.0233		-22.9071	-11.9823	-22.4237	-23.2616	-17.1385
	0.02335		-22.9071	-11.9823	-22.4237	-23.1327	-17.1385
	0.0234		-22.9071	-11.9823	-22.4237	-23.1327	-17.1385
	0.02345		-22.9071	-11.9823	-22.327	-23.1327	-16.9774
	0.0235		-23.1649	-11.8856	-22.327	-23.2616	-16.8807
	0.02355		-23.5194	-11.7889	-22.327	-23.2616	-16.8807
	0.0236		-23.5194	-11.7889	-22.327	-23.3582	-16.8807
	0.02365		-23.7127	-11.7889	-22.4237	-23.3905	-16.8807
	0.0237		-23.7127	-11.6922	-22.4237	-23.4549	-16.8807
	0.02375		-23.2293	-11.6922	-22.4881	-23.4872	-16.8807
	0.0238		-23.0038	-11.6922	-22.5848	-23.6161	-16.8807
	0.02385		-23.0038	-11.7889	-22.5848	-23.6161	-16.8807
	0.0239		-23.0038	-11.8856	-22.5848	-23.6161	-16.8807
	0.02395		-22.9071	-11.8856	-22.5848	-23.6483	-16.9774
	0.024		-22.8104	-11.8856	-22.6493	-23.6483	-17.1385
	0.02405		-22.6493	-11.8856	-22.6493	-23.6483	-17.1385
	0.0241		-22.6493	-11.9178	-22.6493	-23.6161	-17.203
	0.02415		-22.6493	-11.8212	-22.4881	-23.6161	-17.3641
	0.0242		-22.6493	-11.6922	-22.4881	-23.6161	-17.4286
	0.02425		-22.6493	-11.6278	-22.4881	-23.5838	-17.4286
	0.0243		-22.6493	-11.6278	-22.6493	-23.4872	-17.4286
	0.02435		-22.6493	-11.6278	-22.6493	-23.5838	-17.4286
	0.0244		-22.6493	-11.6278	-22.6493	-23.5838	-17.4286
	0.02445		-22.6493	-11.6278	-22.6493	-23.5838	-17.4286
	0.0245		-22.6493	-11.6278	-22.6493	-23.4872	-17.5252
	0.02455		-22.5526	-11.7889	-22.6493	-23.3905	-17.5252
	0.0246		-22.5526	-11.9178	-22.4881	-23.3905	-17.4286
	0.02465		-22.5526	-11.9178	-22.4237	-23.3905	-17.3641
	0.0247		-22.5526	-11.9178	-22.327	-23.3905	-17.203
	0.02475		-22.5526	-11.9178	-22.327	-23.3905	-17.203
	0.0248		-22.5526	-11.9823	-22.1659	-23.3905	-17.203
	0.02485		-22.5526	-12.0467	-21.9081	-23.4872	-17.3319
	0.0249		-22.5526	-12.0467	-21.9081	-23.5838	-17.3319
	0.02495		-22.5526	-12.0467	-21.9081	-23.5838	-17.3319
	0.025		-22.4237	-12.0467	-21.9081	-23.4872	-17.3641
	0.02505		-22.2625	-12.0467	-21.9081	-23.4872	-17.3641
	0.0251		-22.1981	-11.9823	-22.1659	-23.4872	-17.3641
	0.02515		-22.1336	-11.9178	-22.1659	-23.5516	-17.3641
	0.0252		-22.1336	-11.9823	-21.9081	-23.4549	-17.3641
	0.02525		-22.1336	-12.0467	-21.9081	-23.5516	-17.3319
	0.0253		-22.1981	-12.0467	-21.9081	-23.4549	-17.3641
	0.02535		-22.2625	-11.9823	-21.9081	-23.3905	-17.3319
	0.0254		-22.2625	-11.9823	-21.9081	-23.3905	-17.2352
	0.02545		-22.2625	-11.9823	-21.6825	-23.3905	-17.1063
	0.0255		-22.2625	-11.9823	-21.6825	-23.3905	-17.1063
	0.02555		-22.4237	-11.9823	-21.6825	-23.3905	-16.9774
	0.0256		-22.4237	-11.9823	-21.6825	-23.3905	-16.8807
	0.02565		-22.4237	-11.9823	-21.6502	-23.3905	-16.8163
	0.0257		-22.4237	-11.9823	-21.618	-23.3905	-16.7518
	0.02575		-22.4237	-11.9823	-21.618	-23.3905	-16.7518
	0.0258		-22.4237	-12.0467	-21.618	-23.3905	-16.7518
	0.02585		-22.4237	-12.0467	-21.618	-23.3905	-16.7196
	0.0259		-22.4237	-12.0467	-21.618	-23.3905	-16.6874
	0.02595		-22.4237	-12.0467	-21.618	-23.3582	-16.6874
	0.026		-22.4237	-12.0467	-21.618	-23.2938	-16.6874
	0.02605		-22.2625	-12.0467	-21.618	-23.2293	-16.6874
	0.0261		-22.2625	-12.1112	-21.618	-23.2293	-16.6874
	0.02615		-22.2625	-12.1112	-21.6502	-23.2293	-16.6874
	0.0262		-22.1981	-12.1756	-21.6502	-23.2293	-16.5907
	0.02625		-22.1981	-12.1756	-21.6502	-23.2293	-16.494
	0.0263		-22.1981	-12.1112	-21.618	-23.2293	-16.5907
	0.02635		-22.1659	-12.1112	-21.4569	-23.2293	-16.5907
	0.0264		-22.1659	-12.0467	-21.4569	-23.2293	-16.5907
	0.02645		-22.1659	-12.0467	-21.4569	-23.2293	-16.494
	0.0265		-22.1659	-11.9823	-21.4569	-23.2938	-16.4295
	0.02655		-22.2625	-11.7889	-21.2958	-23.3582	-16.4295
	0.0266		-22.2625	-11.6278	-21.1668	-23.3905	-16.4295
	0.02665		-22.2625	-11.6278	-21.1668	-23.3905	-16.3329
	0.0267		-22.1659	-11.6278	-21.0702	-23.3905	-16.3006
	0.02675		-22.1659	-11.7567	-21.0702	-23.3905	-16.3006
	0.0268		-22.2625	-11.8856	-21.0702	-23.326	-16.3006
	0.02685		-22.2625	-11.9823	-21.0702	-23.2293	-16.3006
	0.0269		-22.2625	-11.9823	-21.0702	-23.1649	-16.2362
	0.02695		-22.2625	-11.9823	-21.0702	-23.1649	-16.1717
	0.027		-22.1659	-11.9823	-21.0702	-23.1649	-16.1717
	0.02705		-22.037	-11.9823	-21.0702	-23.1649	-16.1717
	0.0271		-22.037	-12.0467	-21.0702	-23.1004	-16.1717
	0.02715		-22.037	-12.0467	-21.0702	-23.036	-16.2362
	0.0272		-22.037	-11.9823	-21.0702	-23.036	-16.2362
	0.02725		-22.1981	-11.9823	-21.0702	-22.9715	-16.2362
	0.0273		-22.1981	-11.9823	-21.0702	-23.036	-16.2362
	0.02735		-22.1981	-11.8856	-21.0702	-23.1004	-16.3329
	0.0274		-22.1981	-11.7567	-21.0702	-23.1004	-16.3329
	0.02745		-22.1981	-11.6278	-21.0702	-23.1004	-16.3651
	0.0275		-22.1981	-11.5633	-21.0702	-23.0682	-16.3651
	0.02755		-22.1981	-11.5633	-21.0702	-23.0682	-16.3651
	0.0276		-22.037	-11.6278	-21.1024	-23.036	-16.3651
	0.02765		-22.037	-11.6278	-21.1024	-22.9715	-16.4295
	0.0277		-22.037	-11.6278	-21.1024	-22.8749	-16.4295
	0.02775		-22.037	-11.6278	-21.1024	-22.8749	-16.4295
	0.0278		-22.037	-11.7567	-21.1024	-22.9393	-16.4295
	0.02785		-22.037	-11.8856	-21.1991	-22.8749	-16.4295
	0.0279		-22.037	-11.8856	-21.2958	-22.8749	-16.4295
	0.02795		-22.037	-11.9823	-21.1991	-22.9393	-16.4295
	0.028		-22.1981	-12.1112	-21.1024	-22.9715	-16.4295
	0.02805		-22.3915	-12.1756	-21.1024	-23.036	-16.4295
	0.0281		-22.3915	-12.1756	-21.1024	-23.0682	-16.4295
	0.02815		-22.617	-12.1112	-21.1024	-23.1004	-16.4295
	0.0282		-22.617	-11.9823	-21.1024	-23.1649	-16.4295
	0.02825		-22.617	-12.1112	-21.1024	-23.2293	-16.4295
	0.0283		-22.617	-12.1756	-21.1024	-23.2293	-16.784
	0.02835		-22.617	-12.3046	-21.1024	-23.2293	-17.1063
	0.0284		-22.7137	-12.1756	-21.1991	-23.2293	-17.1063
	0.02845		-22.7459	-12.1112	-21.2958	-23.2293	-17.2352
	0.0285		-22.7459	-12.1756	-21.2958	-23.1649	-17.3319
	0.02855		-22.7459	-12.3046	-21.2958	-23.1004	-17.3319
	0.0286		-22.7459	-12.3046	-21.2958	-23.0682	-17.3319
	0.02865		-22.7137	-12.4335	-21.2958	-23.036	-17.3319
	0.0287		-22.7137	-12.4335	-21.2958	-22.9715	-17.3963
	0.02875		-22.7137	-12.3046	-21.2958	-22.9393	-17.4608
	0.0288		-22.7137	-12.1756	-21.2958	-22.8749	-17.493
	0.02885		-22.7137	-12.1756	-21.2958	-22.8749	-17.5252
	0.0289		-22.7137	-12.2079	-21.2958	-22.8749	-17.5252
	0.02895		-22.7137	-12.2079	-21.2958	-22.8749	-17.5252
	0.029		-22.8104	-12.2079	-21.2958	-22.8749	-17.493
	0.02905		-22.9071	-12.2079	-21.2958	-22.9393	-17.4608
	0.0291		-22.9071	-12.2079	-21.2958	-22.9715	-17.4608
	0.02915		-23.0038	-12.2079	-21.2958	-22.9715	-17.4608
	0.0292		-23.0682	-12.2079	-21.328	-22.9715	-17.4608
	0.02925		-23.1004	-12.2723	-21.3602	-22.9715	-17.4608
	0.0293		-23.1004	-12.2723	-21.3602	-22.9715	-17.4608
	0.02935		-23.1004	-12.2723	-21.328	-22.9393	-17.4608
	0.0294		-23.1004	-12.0467	-21.328	-22.8749	-17.4608
	0.02945		-23.1004	-11.66	-21.328	-22.7782	-17.4286
	0.0295		-23.1004	-11.5311	-21.328	-22.7782	-17.3641
	0.02955		-23.1004	-11.5311	-21.3602	-22.7459	-17.3641
	0.0296		-23.0682	-11.5311	-21.4891	-22.7459	-17.3641
	0.02965		-23.0682	-11.5311	-21.618	-22.7459	-17.3641
	0.0297		-23.0682	-11.5311	-21.6502	-22.7782	-17.4286
	0.02975		-23.0682	-11.5956	-21.6502	-22.7782	-17.4608
	0.0298		-23.036	-11.5311	-21.6502	-22.7782	-17.4608
	0.02985		-23.036	-11.5311	-21.7791	-22.7782	-17.4608
	0.0299		-23.036	-11.5311	-21.7791	-22.7459	-17.493
	0.02995		-23.0682	-11.5311	-21.7791	-22.7459	-17.5252
	0.03		-23.1004	-11.5311	-21.7791	-22.7782	-17.5252
	0.03005		-23.1327	-11.5311	-21.6502	-22.8749	-17.5252
	0.0301		-23.1327	-11.5311	-21.6502	-22.8749	-17.5252
	0.03015		-23.1327	-11.5311	-21.6502	-22.8749	-17.5252
	0.0302		-23.1327	-11.4344	-21.6502	-22.8749	-17.5252
	0.03025		-23.1327	-11.37	-21.6502	-22.8749	-17.5575
	0.0303		-23.1327	-11.3055	-21.6502	-22.9393	-17.5897
	0.03035		-23.1327	-11.3055	-21.6502	-22.9393	-17.5897
	0.0304		-23.1327	-11.3055	-21.6502	-22.9393	-17.5897
	0.03045		-23.1327	-11.37	-21.6825	-22.9715	-17.5897
	0.0305		-23.1327	-11.4344	-21.8114	-23.036	-17.5897
	0.03055		-23.1004	-11.4344	-21.8114	-23.1004	-17.5897
	0.0306		-23.0682	-11.5311	-21.6825	-23.1649	-17.5897
	0.03065		-23.036	-11.5956	-21.8114	-23.2616	-17.5897
	0.0307		-22.9715	-11.7245	-21.9403	-23.2616	-17.5897
	0.03075		-22.9071	-11.7245	-21.9403	-23.3905	-17.5575
	0.0308		-22.9071	-11.5956	-21.9403	-23.4872	-17.5575
	0.03085		-22.9071	-11.5633	-21.9403	-23.5194	-17.5897
	0.0309		-22.9071	-11.4989	-21.9403	-23.5516	-17.5897
	0.03095		-22.9071	-11.4344	-21.9403	-23.6161	-17.5897
	0.031		-22.9715	-11.37	-21.9403	-23.6805	-17.5575
	0.03105		-23.036	-11.3055	-21.9403	-23.7127	-17.5575
	0.0311		-22.9715	-11.2733	-21.9403	-23.6805	-17.5575
	0.03115		-22.9715	-11.2733	-21.9403	-23.6805	-17.5575
	0.0312		-23.036	-11.2733	-21.9403	-23.6805	-17.5575
	0.03125		-23.0682	-11.2733	-21.9403	-23.6161	-17.5575
	0.0313		-23.0682	-11.3055	-21.9403	-23.6161	-17.5575
	0.03135		-23.0682	-11.3055	-21.9403	-23.5516	-17.5575
	0.0314		-23.0682	-11.37	-21.9403	-23.4872	-17.5575
	0.03145		-23.0682	-11.37	-21.9403	-23.3905	-17.5575
	0.0315		-23.0682	-11.37	-21.9403	-23.2616	-17.5575
	0.03155		-23.0682	-11.4344	-21.9725	-23.2616	-17.5575
	0.0316		-23.036	-11.4667	-21.9725	-23.2616	-17.5575
	0.03165		-22.9715	-11.4667	-21.9725	-23.2616	-17.5575
	0.0317		-22.9715	-11.4344	-22.0047	-23.3905	-17.5897
	0.03175		-22.8104	-11.37	-22.2303	-23.4872	-17.5897
	0.0318		-22.8104	-11.3055	-22.2625	-23.5516	-17.5897
	0.03185		-22.8104	-11.2733	-22.2625	-23.6161	-17.5897
	0.0319		-22.8104	-11.2733	-22.2625	-23.6805	-17.5897
	0.03195		-22.8104	-11.2733	-22.2625	-23.7127	-17.7831
	0.032		-22.9715	-11.2733	-22.5526	-23.7772	-17.7831
	0.03205		-23.036	-11.2733	-22.6815	-23.9061	-17.5897
	0.0321		-23.0682	-11.2733	-22.7459	-24.0028	-17.5897
	0.03215		-23.1004	-11.2411	-22.7459	-24.0028	-17.5897
	0.0322		-23.1004	-11.2733	-22.7459	-23.9061	-17.5575
	0.03225		-23.0682	-11.2733	-22.7782	-23.9061	-17.493
	0.0323		-23.0682	-11.3055	-22.7782	-23.7772	-17.4286
	0.03235		-23.0682	-11.37	-22.7782	-23.7772	-17.3963
	0.0324		-23.0682	-11.4344	-22.7782	-23.7772	-17.3963
	0.03245		-23.0682	-11.4344	-22.8426	-23.7772	-17.3963
	0.0325		-23.0682	-11.4344	-22.8426	-23.8739	-17.3963
	0.03255		-23.0682	-11.4667	-22.7782	-23.9383	-17.3963
	0.0326		-23.0682	-11.4667	-22.7782	-23.9706	-17.3963
	0.03265		-23.0682	-11.4667	-22.7782	-24.0028	-17.3641
	0.0327		-23.0682	-11.4667	-22.7782	-24.0028	-17.2674
	0.03275		-23.0682	-11.4667	-22.7782	-24.035	-17.2674
	0.0328		-23.1004	-11.4344	-22.7782	-24.0672	-17.2674
	0.03285		-23.1004	-11.37	-22.7782	-24.0995	-17.2674
	0.0329		-23.1004	-11.3055	-22.7782	-24.0995	-17.2674
	0.03295		-23.1004	-11.2733	-22.8426	-24.1317	-17.2674
	0.033		-23.1004	-11.2733	-22.9715	-24.2606	-17.2674
	0.03305		-23.1004	-11.2411	-22.9715	-24.2606	-17.2674
	0.0331		-23.1004	-11.2733	-22.8426	-24.3895	-17.2674
	0.03315		-23.1004	-11.2733	-22.7782	-24.3895	-17.2674
	0.0332		-23.1004	-11.3055	-22.7782	-24.3895	-17.2674
	0.03325		-23.1004	-11.3055	-22.7782	-24.2606	-17.1063
	0.0333		-23.1004	-11.3055	-22.7782	-24.2928	-16.9774
	0.03335		-23.1004	-11.2733	-22.8426	-24.3895	-16.9452
	0.0334		-23.1004	-11.3055	-22.8426	-24.3895	-16.9452
	0.03345		-23.036	-11.3378	-22.8426	-24.2928	-16.9129
	0.0335		-23.036	-11.3378	-22.8426	-24.3895	-16.9129
	0.03355		-23.0038	-11.3378	-22.9715	-24.4217	-16.9129
	0.0336		-22.9715	-11.3378	-23.0682	-24.4217	-16.9129
	0.03365		-22.9715	-11.3378	-23.0682	-24.454	-16.9129
	0.0337		-22.8426	-11.3378	-23.1327	-24.5829	-16.9129
	0.03375		-22.8426	-11.3378	-23.1327	-24.7118	-16.9129
	0.0338		-22.8426	-11.3378	-23.1327	-24.7118	-16.9129
	0.03385		-22.8426	-11.3378	-23.1327	-24.744	-16.9129
	0.0339		-22.8426	-11.3378	-23.1327	-24.7118	-16.8485
	0.03395		-22.8426	-11.3378	-23.1971	-24.5829	-16.784
	0.034		-22.8426	-11.3378	-23.1327	-24.4862	-16.784
	0.03405		-22.8426	-11.3378	-23.0682	-24.4862	-16.8485
	0.0341		-22.9715	-11.37	-23.0682	-24.4862	-16.8485
	0.03415		-22.9715	-11.4344	-23.0682	-24.454	-16.784
	0.0342		-22.9715	-11.4667	-23.0682	-24.4217	-16.7196
	0.03425		-22.9715	-11.4667	-22.9715	-24.3895	-16.7196
	0.0343		-22.9715	-11.4667	-22.8104	-24.3895	-16.7196
	0.03435		-22.9715	-11.4667	-22.8104	-24.3895	-16.6874
	0.0344		-22.9715	-11.4667	-22.8104	-24.4217	-16.6551
	0.03445		-23.0038	-11.4667	-22.9715	-24.4217	-16.6551
	0.0345		-23.0038	-11.4667	-23.0682	-24.4217	-16.6551
	0.03455		-23.0038	-11.4667	-23.0682	-24.4217	-16.6551
	0.0346		-23.0038	-11.4667	-22.9715	-24.4217	-16.6551
	0.03465		-23.0038	-11.4667	-22.8104	-24.454	-16.6551
	0.0347		-22.8749	-11.4667	-22.9715	-24.454	-16.5907
	0.03475		-22.7137	-11.4022	-23.0682	-24.454	-16.494
	0.0348		-22.8749	-11.4022	-23.0682	-24.454	-16.494
	0.03485		-22.8749	-11.4022	-23.0682	-24.4217	-16.494
	0.0349		-22.8749	-11.4022	-23.0682	-24.454	-16.3329
	0.03495		-22.8749	-11.4022	-23.0682	-24.4862	-16.204
	0.035		-22.8749	-11.4667	-22.9715	-24.4862	-16.204
	0.03505		-22.7137	-11.4667	-23.0682	-24.4862	-16.204
	0.0351		-22.8749	-11.4989	-23.1327	-24.454	-16.0751
	0.03515		-23.0038	-11.4989	-23.1327	-24.4217	-15.9784
	0.0352		-23.0038	-11.4989	-23.1327	-24.4217	-15.9461
	0.03525		-23.0038	-11.5311	-23.1327	-24.3895	-15.9139
	0.0353		-23.0038	-11.5633	-23.1327	-24.3895	-15.9139
	0.03535		-23.0038	-11.6922	-23.1327	-24.3895	-15.8817
	0.0354		-23.0038	-11.6922	-23.1327	-24.2928	-15.8172
	0.03545		-23.0038	-11.6922	-23.1327	-24.1961	-15.8172
	0.0355		-23.0038	-11.6922	-23.1971	-24.1317	-15.7528
	0.03555		-23.0038	-11.6922	-23.2293	-24.0995	-15.7528
	0.0356		-23.0038	-11.5633	-23.2938	-24.0995	-15.7528
	0.03565		-23.0682	-11.5311	-23.2938	-24.0672	-15.7528
	0.0357		-23.0682	-11.4989	-23.2938	-24.0672	-15.8495
	0.03575		-23.1327	-11.5311	-23.2938	-24.035	-15.7528
	0.0358		-23.1327	-11.5633	-23.2938	-24.035	-15.6883
	0.03585		-23.1327	-11.6922	-23.2293	-24.035	-15.6561
	0.0359		-23.1327	-11.7889	-23.1971	-24.0028	-15.6561
	0.03595		-23.1327	-11.7889	-23.1971	-23.9706	-15.6883
	0.036		-23.1327	-11.7889	-23.1327	-23.9383	-15.6883
	0.03605		-23.1327	-11.8212	-23.0682	-23.9061	-15.6561
	0.0361		-23.1649	-11.8856	-22.9071	-23.9061	-15.5917
	0.03615		-23.1971	-11.9178	-22.7459	-23.9061	-15.5917
	0.0362		-23.1971	-11.9178	-22.7459	-23.9061	-15.5917
	0.03625		-23.1971	-11.9178	-22.7459	-23.9061	-15.5917
	0.0363		-23.1971	-11.9178	-22.7459	-23.9061	-15.6561
	0.03635		-23.1971	-11.9178	-22.7459	-23.9061	-15.6561
	0.0364		-23.1971	-11.9178	-22.7459	-23.9061	-15.5917
	0.03645		-23.1971	-11.9178	-22.7459	-23.9061	-15.495
	0.0365		-23.1971	-11.9178	-22.7459	-23.9061	-15.495
	0.03655		-23.1971	-11.9178	-22.7459	-23.9061	-15.495
	0.0366		-23.1971	-11.9178	-22.7459	-23.9061	-15.5917
	0.03665		-23.2616	-11.9178	-22.7459	-23.9061	-15.5917
	0.0367		-23.2938	-11.9178	-22.7459	-23.9061	-15.495
	0.03675		-23.326	-11.9178	-22.7459	-23.8739	-15.3983
	0.0368		-23.2938	-12.0145	-22.7459	-23.8739	-15.3338
	0.03685		-23.2938	-12.0145	-22.7459	-23.8739	-15.3338
	0.0369		-23.2938	-12.0145	-22.6815	-23.8094	-15.3338
	0.03695		-23.2938	-12.1112	-22.5848	-23.7772	-15.3338
	0.037		-23.2938	-12.1112	-22.5526	-23.745	-15.3338
	0.03705		-23.2938	-12.1112	-22.5526	-23.6805	-15.3983
	0.0371		-23.2938	-12.1112	-22.4237	-23.6483	-15.3983
	0.03715		-23.2938	-12.1112	-22.4237	-23.6483	-15.3983
	0.0372		-23.2938	-12.1112	-22.4237	-23.6483	-15.3338
	0.03725		-23.2938	-12.0145	-22.2625	-23.6805	-15.3338
	0.0373		-23.2938	-11.9178	-22.2625	-23.745	-15.2694
	0.03735		-23.2938	-11.9178	-22.4237	-23.6805	-15.3338
	0.0374		-23.2938	-11.9178	-22.4237	-23.6483	-15.3338
	0.03745		-23.2938	-11.9178	-22.2625	-23.6483	-15.3338
	0.0375		-23.2938	-11.9178	-22.2625	-23.6161	-15.3338
	0.03755		-23.326	-11.9178	-22.3915	-23.5838	-15.3338
	0.0376		-23.326	-11.9178	-22.3915	-23.5838	-15.3338
	0.03765		-23.2938	-11.9178	-22.2625	-23.5838	-15.3983
	0.0377		-23.2938	-11.9178	-22.2625	-23.6161	-15.3338
	0.03775		-23.2616	-11.9178	-22.2625	-23.6161	-15.3338
	0.0378		-23.1971	-11.9178	-22.2625	-23.6161	-15.3338
	0.03785		-23.1971	-11.9178	-22.2625	-23.5838	-15.3338
	0.0379		-23.1971	-11.9178	-22.2625	-23.5838	-15.3338
	0.03795		-23.1971	-11.9178	-22.2625	-23.5838	-15.3338
	0.038		-23.1971	-11.9178	-22.2625	-23.5838	-15.2372
	0.03805		-23.0682	-11.9178	-22.2625	-23.5838	-15.1405
	0.0381		-23.0038	-12.0145	-22.0692	-23.5838	-15.1405
	0.03815		-23.0038	-12.0145	-22.0692	-23.5838	-15.0116
	0.0382		-23.0038	-12.0145	-22.3592	-23.5838	-14.8182
	0.03825		-23.0682	-11.9178	-22.5204	-23.6161	-14.7215
	0.0383		-23.0682	-11.9178	-22.5204	-23.6161	-14.6571
	0.03835		-23.0682	-11.9178	-22.5204	-23.6161	-14.6249
	0.0384		-23.0682	-11.9178	-22.5204	-23.6483	-14.6249
	0.03845		-23.0682	-11.9178	-22.5204	-23.6483	-14.6249
	0.0385		-23.0038	-11.9178	-22.5526	-23.6483	-14.6249
	0.03855		-23.0038	-11.9178	-22.5204	-23.6483	-14.6571
	0.0386		-23.0038	-11.9178	-22.3592	-23.6483	-14.7215
	0.03865		-23.0038	-11.9178	-22.2303	-23.6483	-14.786
	0.0387		-23.0038	-11.9178	-22.1336	-23.6483	-14.6571
	0.03875		-22.9715	-11.9178	-22.1336	-23.6161	-14.6571
	0.0388		-22.9715	-11.9178	-22.1336	-23.6161	-14.6571
	0.03885		-22.8426	-11.9178	-22.1336	-23.5838	-14.6571
	0.0389		-22.8426	-11.9178	-22.1336	-23.5838	-14.6571
	0.03895		-22.8426	-11.9178	-22.1336	-23.6161	-14.786
	0.039		-22.8426	-11.9178	-22.2303	-23.6483	-14.786
	0.03905		-22.8426	-11.8856	-22.327	-23.6483	-14.6571
	0.0391		-22.8426	-11.8856	-22.327	-23.6483	-14.6249
	0.03915		-22.8426	-11.8856	-22.327	-23.6483	-14.6249
	0.0392		-22.7137	-11.8856	-22.327	-23.6483	-14.6249
	0.03925		-22.5848	-11.8856	-22.327	-23.6483	-14.6249
	0.0393		-22.4559	-11.8856	-22.327	-23.6483	-14.6249
	0.03935		-22.4559	-11.8856	-22.327	-23.6483	-14.6249
	0.0394		-22.4559	-11.9178	-22.327	-23.6483	-14.6249
	0.03945		-22.3592	-11.9178	-22.2303	-23.6483	-14.6571
	0.0395		-22.3592	-11.9178	-22.1659	-23.6483	-14.786
	0.03955		-22.3592	-11.8534	-22.0692	-23.6483	-14.9471
	0.0396		-22.3592	-11.8856	-22.1659	-23.6483	-14.9471
	0.03965		-22.327	-11.8856	-22.2303	-23.6483	-14.9471
	0.0397		-22.3915	-11.8856	-22.2303	-23.6161	-14.9471
	0.03975		-22.4559	-11.8856	-22.2303	-23.5838	-14.9471
	0.0398		-22.4559	-11.8856	-22.2303	-23.5838	-14.8182
	0.03985		-22.4559	-11.8212	-22.2303	-23.5838	-14.8182
	0.0399		-22.4559	-11.8856	-22.2303	-23.5838	-14.8182
	0.03995		-22.4559	-11.8856	-22.2303	-23.5838	-14.9471
	0.04		-22.4559	-11.8856	-22.1659	-23.5516	-14.9471
	0.04005		-22.4559	-11.8212	-22.0692	-23.5838	-14.9471
	0.0401		-22.3915	-11.8856	-22.037	-23.6161	-14.9471
	0.04015		-22.1336	-11.9178	-22.037	-23.6483	-15.076
	0.0402		-21.8114	-12.0145	-22.037	-23.6483	-14.9471
	0.04025		-21.7147	-11.9178	-22.037	-23.6483	-14.9471
	0.0403		-21.7147	-11.8856	-22.037	-23.6483	-14.9471
	0.04035		-21.7147	-11.8856	-21.9725	-23.6483	-14.8504
	0.0404		-21.7147	-11.8856	-21.9725	-23.6483	-14.8504
	0.04045		-21.7147	-11.8856	-21.9725	-23.6483	-14.9471
	0.0405		-21.7147	-11.9178	-21.9725	-23.6483	-15.076
	0.04055		-21.7147	-11.9178	-21.9725	-23.6483	-15.076
	0.0406		-21.7147	-12.0145	-21.9725	-23.6483	-15.076
	0.04065		-21.7147	-12.0145	-21.9725	-23.6805	-15.076
	0.0407		-22.037	-12.0145	-21.9725	-23.745	-15.076
	0.04075		-22.037	-11.9178	-21.9725	-23.7772	-15.076
	0.0408		-22.037	-11.8856	-21.9725	-23.8094	-15.1405
	0.04085		-22.037	-11.8212	-22.037	-23.8094	-15.1405
	0.0409		-22.037	-11.7889	-22.037	-23.8094	-15.1405
	0.04095		-22.037	-11.7889	-22.037	-23.8739	-15.1405
	0.041		-22.037	-11.8212	-22.0692	-23.9383	-15.1405
	0.04105		-22.037	-11.8212	-22.1336	-24.0028	-15.1405
	0.0411		-21.618	-11.8212	-22.1981	-24.0028	-15.1405
	0.04115		-21.4569	-11.8212	-22.1981	-23.9383	-15.1405
	0.0412		-21.3602	-11.8212	-22.1981	-24.0028	-15.076
	0.04125		-21.3602	-11.8212	-22.2303	-24.035	-15.1405
	0.0413		-21.3602	-11.8212	-22.2948	-24.035	-15.1405
	0.04135		-21.2958	-11.8212	-22.3915	-24.035	-15.1405
	0.0414		-21.2635	-11.8212	-22.4559	-24.035	-15.1405
	0.04145		-21.2635	-11.7889	-22.4881	-24.035	-15.2049
	0.0415		-21.2635	-11.7889	-22.4881	-24.0672	-15.3338
	0.04155		-21.2635	-11.7889	-22.5204	-24.0672	-15.3338
	0.0416		-21.2635	-11.8212	-22.5526	-24.0995	-15.2049
	0.04165		-21.1991	-11.8212	-22.5526	-24.0995	-15.1405
	0.0417		-21.1991	-11.8212	-22.5526	-24.0995	-15.2049
	0.04175		-21.1991	-11.8212	-22.5204	-24.0995	-15.3338
	0.0418		-21.1991	-11.8212	-22.4881	-24.0672	-15.3338
	0.04185		-21.1991	-11.8856	-22.5204	-24.0028	-15.2049
	0.0419		-21.1991	-12.079	-22.5204	-24.0028	-15.1405
	0.04195		-21.1991	-11.9501	-22.5204	-24.0028	-15.1405
	0.042		-21.1991	-11.9501	-22.5204	-24.0028	-15.1405
	0.04205		-21.1991	-11.9501	-22.5526	-24.0672	-15.1405
	0.0421		-21.1991	-11.8856	-22.5526	-24.0995	-15.1405
	0.04215		-21.1991	-11.8856	-22.5204	-24.1317	-15.1405
	0.0422		-21.1024	-11.8856	-22.4881	-24.1961	-15.1405
	0.04225		-21.1024	-11.8856	-22.5204	-24.2606	-15.2049
	0.0423		-21.1024	-11.9501	-22.5204	-24.2606	-15.3338
	0.04235		-21.1024	-11.9501	-22.4881	-24.325	-15.2049
	0.0424		-21.1024	-11.9501	-22.4881	-24.3573	-15.2049
	0.04245		-21.1024	-11.9501	-22.5204	-24.3573	-15.2049
	0.0425		-21.1024	-11.8856	-22.6493	-24.3895	-15.2049
	0.04255		-21.1024	-11.8534	-22.7459	-24.4217	-15.3338
	0.0426		-21.1024	-11.8212	-22.7459	-24.4217	-15.3338
	0.04265		-21.1991	-11.8212	-22.7459	-24.4217	-15.2049
	0.0427		-21.2635	-11.8212	-22.6493	-24.4217	-15.2049
	0.04275		-21.2958	-11.8212	-22.6493	-24.4217	-15.3338
	0.0428		-21.2958	-11.8534	-22.6493	-24.4217	-15.3338
	0.04285		-21.2635	-11.8856	-22.6493	-24.454	-15.3338
	0.0429		-21.1991	-11.9501	-22.6493	-24.4862	-15.2049
	0.04295		-21.1991	-11.8856	-22.6493	-24.4862	-15.1405
	0.043		-21.1991	-11.8534	-22.5204	-24.4862	-15.1405
	0.04305		-21.1991	-11.8534	-22.5204	-24.4862	-15.2049
	0.0431		-21.2635	-11.8212	-22.5204	-24.4862	-15.3338
	0.04315		-21.2635	-11.8212	-22.5204	-24.4862	-15.4305
	0.0432		-21.1991	-11.7889	-22.5204	-24.4862	-15.4305
	0.04325		-21.1024	-11.7889	-22.4559	-24.5184	-15.4305
	0.0433		-20.9413	-11.8212	-22.4559	-24.5506	-15.4305
	0.04335		-20.9413	-11.7889	-22.4237	-24.5506	-15.4305
	0.0434		-20.9413	-11.7889	-22.4237	-24.5506	-15.4628
	0.04345		-20.9413	-11.7889	-22.4559	-24.5506	-15.495
	0.0435		-21.1024	-11.7889	-22.4559	-24.5506	-15.5272
	0.04355		-21.1991	-11.7567	-22.617	-24.5506	-15.4628
	0.0436		-21.1991	-11.66	-22.617	-24.5506	-15.4305
	0.04365		-21.2635	-11.5956	-22.617	-24.5506	-15.3338
	0.0437		-21.2958	-11.66	-22.617	-24.5506	-15.3338
	0.04375		-21.4247	-11.7567	-22.617	-24.6151	-15.2372
	0.0438		-21.5536	-11.7889	-22.7459	-24.744	-15.1727
	0.04385		-21.7469	-11.7889	-22.7459	-24.8407	-15.1727
	0.0439		-21.7469	-11.8212	-22.7459	-24.8407	-15.1727
	0.04395		-21.7469	-11.8534	-22.5848	-24.8407	-15.076
	0.044		-21.7469	-11.8856	-22.3915	-24.8407	-15.076
	0.04405		-21.7469	-11.9501	-22.3915	-24.8407	-15.076
	0.0441		-21.7469	-11.9501	-22.5848	-24.8407	-15.1727
	0.04415		-21.7469	-11.9501	-22.7459	-24.744	-15.2372
	0.0442		-22.037	-11.9501	-22.7459	-24.6151	-15.3338
	0.04425		-22.037	-11.9501	-22.7459	-24.744	-15.3338
	0.0443		-22.037	-11.8856	-22.7459	-24.744	-15.3338
	0.04435		-22.037	-11.8534	-22.7459	-24.8407	-15.4305
	0.0444		-22.037	-11.8212	-22.7459	-24.9051	-15.4628
	0.04445		-22.037	-11.8212	-22.8104	-25.0663	-15.4305
	0.0445		-22.037	-11.8212	-22.8749	-25.1952	-15.3338
	0.04455		-22.037	-11.8212	-22.9393	-25.1952	-15.3016
	0.0446		-22.2625	-11.8212	-22.8749	-25.1952	-15.3016
	0.04465		-22.3915	-11.7889	-22.8104	-25.2274	-15.1727
	0.0447		-22.3915	-11.7889	-22.8749	-25.3241	-15.1727
	0.04475		-22.3915	-11.8212	-22.8749	-25.4852	-15.1727
	0.0448		-22.3915	-11.8856	-22.8749	-25.4852	-15.3016
	0.04485		-22.3915	-11.9501	-22.8749	-25.4852	-15.1727
	0.0449		-22.3915	-11.9501	-22.8104	-25.4852	-15.1727
	0.04495		-22.3915	-11.9823	-22.7459	-25.4852	-15.1405
	0.045		-22.3915	-11.9501	-22.7459	-25.4852	-15.1405
	0.04505		-22.7782	-11.9501	-22.7782	-25.4852	-15.0438
	0.0451		-22.7782	-11.9501	-22.7782	-25.3241	-15.0438
	0.04515		-22.7782	-11.9501	-22.7782	-25.3241	-15.0438
	0.0452		-22.7782	-11.9501	-22.7782	-25.4852	-15.1727
	0.04525		-22.7782	-11.9501	-22.7782	-25.5819	-15.1727
	0.0453		-22.7782	-11.9823	-22.8426	-25.6141	-15.1727
	0.04535		-23.0038	-11.9823	-22.8749	-25.6141	-15.3016
	0.0454		-23.0038	-11.9823	-22.8749	-25.6141	-15.3016
	0.04545		-23.1327	-11.9501	-22.8749	-25.6141	-15.1727
	0.0455		-23.326	-11.9178	-22.8749	-25.6141	-15.076
	0.04555		-23.4227	-11.9178	-22.8426	-25.6141	-15.1727
	0.0456		-23.2938	-11.8212	-22.7782	-25.6141	-15.1727
	0.04565		-23.2938	-11.8212	-22.7782	-25.6141	-15.076
	0.0457		-23.2938	-11.8212	-22.7782	-25.6141	-15.076
	0.04575		-23.2938	-11.8212	-22.7782	-25.6141	-15.076
	0.0458		-23.1327	-11.9178	-22.7782	-25.6141	-15.076
	0.04585		-23.0038	-11.9823	-22.7782	-25.6786	-15.076
	0.0459		-22.7782	-12.0467	-22.7459	-25.7108	-15.1727
	0.04595		-22.3915	-12.0467	-22.7459	-25.6786	-15.1727
	0.046		-22.1659	-12.0467	-22.7137	-25.6141	-15.1727
	0.04605		-22.1336	-12.0467	-22.617	-25.6141	-15.2049
	0.0461		-22.1336	-11.9823	-22.7137	-25.6141	-15.3338
	0.04615		-22.1659	-11.9178	-22.7137	-25.6141	-15.4628
	0.0462		-22.3915	-11.8212	-22.7459	-25.6141	-15.4628
	0.04625		-22.7782	-11.7567	-22.7782	-25.6141	-15.5594
	0.0463		-22.8426	-11.66	-22.7137	-25.6141	-15.5594
	0.04635		-22.8426	-11.5956	-22.617	-25.6141	-15.5594
	0.0464		-22.9715	-11.5311	-22.4881	-25.6786	-15.495
	0.04645		-23.036	-11.5311	-22.3915	-25.7108	-15.495
	0.0465		-23.036	-11.5311	-22.3592	-25.7108	-15.495
	0.04655		-23.036	-11.5311	-22.3592	-25.7108	-15.5917
	0.0466		-23.036	-11.5311	-22.3592	-25.743	-15.6883
	0.04665		-23.1327	-11.5311	-22.3592	-25.8075	-15.785
	0.0467		-23.2938	-11.5311	-22.3592	-25.8719	-15.6883
	0.04675		-23.2938	-11.5311	-22.3592	-25.9364	-15.6883
	0.0468		-23.2938	-11.5311	-22.3592	-26.0008	-15.785
	0.04685		-23.1327	-11.5311	-22.327	-26.0653	-15.9784
	0.0469		-23.036	-11.5311	-22.327	-26.0653	-16.1395
	0.04695		-22.9715	-11.5311	-22.327	-26.0653	-16.1395
	0.047		-22.9071	-11.5956	-22.327	-26.0653	-15.9139
	0.04705		-22.9071	-11.66	-22.2303	-26.0653	-16.1395
	0.0471		-22.8426	-11.7567	-22.327	-26.033	-16.1073
	0.04715		-22.8426	-11.7567	-22.3592	-25.9364	-16.1073
	0.0472		-22.8426	-11.7889	-22.4559	-25.9364	-16.1073
	0.04725		-22.8426	-11.8212	-22.4559	-25.9364	-16.1073
	0.0473		-22.8426	-11.8212	-22.617	-25.8719	-16.1073
	0.04735		-22.8426	-11.8212	-22.7459	-25.8075	-16.1073
	0.0474		-22.8426	-11.8212	-22.7459	-25.743	-16.1395
	0.04745		-22.9071	-11.8212	-22.7459	-25.7108	-16.1395
	0.0475		-22.9071	-11.8212	-22.617	-25.7108	-16.1395
	0.04755		-22.9071	-11.8212	-22.617	-25.6786	-16.1073
	0.0476		-22.9071	-11.8212	-22.617	-25.6141	-16.1073
	0.04765		-22.9071	-11.8212	-22.617	-25.5174	-16.1073
	0.0477		-22.8426	-11.8212	-22.617	-25.5174	-16.1395
	0.04775		-22.7782	-11.8856	-22.5526	-25.5174	-16.1395
	0.0478		-22.4559	-11.8856	-22.5526	-25.5174	-16.1395
	0.04785		-22.7782	-11.8856	-22.4237	-25.5174	-16.1395
	0.0479		-22.8426	-11.8856	-22.4237	-25.5174	-16.1395
	0.04795		-22.7782	-11.9501	-22.4237	-25.4207	-16.1395
	0.048		-22.4559	-11.9823	-22.5526	-25.3563	-16.1395
	0.04805		-22.1659	-12.0467	-22.5526	-25.3241	-16.1073
	0.0481		-22.1336	-12.1112	-22.5848	-25.2274	-16.1073
	0.04815		-22.1336	-12.2401	-22.6493	-25.1307	-16.1073
	0.0482		-22.1336	-12.4335	-22.5848	-25.1307	-16.1073
	0.04825		-22.1659	-12.4979	-22.6493	-25.0985	-16.1073
	0.0483		-22.4559	-12.4335	-22.7459	-24.9696	-16.1073
	0.04835		-22.4559	-12.4335	-22.7459	-24.8084	-16.1073
	0.0484		-22.4559	-12.4335	-22.6493	-24.8084	-16.1073
	0.04845		-22.7782	-12.4335	-22.5848	-24.9696	-16.1073
	0.0485		-22.7782	-12.4335	-22.5526	-24.9696	-16.1073
	0.04855		-22.7782	-12.4335	-22.5526	-24.8084	-16.1073
	0.0486		-22.7782	-12.4335	-22.5848	-24.8084	-16.1073
	0.04865		-22.8426	-12.4335	-22.5848	-24.8084	-16.1073
	0.0487		-22.8426	-12.4335	-22.5848	-24.8084	-16.1073
	0.04875		-22.7782	-12.4012	-22.5526	-24.744	-16.1395
	0.0488		-22.7459	-12.4012	-22.4881	-24.744	-16.1717
	0.04885		-22.4559	-12.4012	-22.4881	-24.744	-16.1717
	0.0489		-22.2948	-12.4012	-22.5526	-24.7118	-16.3006
	0.04895		-22.2948	-12.4012	-22.5848	-24.7118	-16.4618
	0.049		-22.1659	-12.4012	-22.5848	-24.6795	-16.5262
	0.04905		-22.1336	-12.4012	-22.5848	-24.6795	-16.5907
	0.0491		-22.1336	-12.4012	-22.5526	-24.5829	-16.5907
	0.04915		-22.1336	-12.4012	-22.4881	-24.6151	-16.5907
	0.0492		-22.1014	-12.4012	-22.5526	-24.6795	-16.5907
	0.04925		-22.1014	-12.4012	-22.5848	-24.6795	-16.5907
	0.0493		-22.1336	-12.4012	-22.617	-24.6795	-16.5907
	0.04935		-22.1659	-12.4012	-22.6493	-24.6151	-16.5907
	0.0494		-22.1659	-12.4012	-22.6493	-24.5184	-16.5907
	0.04945		-22.2948	-12.4012	-22.617	-24.5184	-16.6229
	0.0495		-22.5848	-12.4012	-22.617	-24.454	-16.6551
	0.04955		-22.5848	-12.4012	-22.617	-24.3895	-16.7196
	0.0496		-22.5848	-12.4012	-22.6493	-24.3895	-16.7518
	0.04965		-22.5848	-12.4657	-22.7137	-24.3573	-16.784
	0.0497		-22.5848	-12.4657	-22.7137	-24.2928	-16.8163
	0.04975		-22.2948	-12.4657	-22.617	-24.2284	-16.8807
	0.0498		-22.2625	-12.4657	-22.617	-24.1961	-16.9774
	0.04985		-22.2625	-12.4657	-22.617	-24.1317	-17.1063
	0.0499		-22.1659	-12.4657	-22.7137	-24.1317	-17.1063
	0.04995		-22.1336	-12.4657	-22.8104	-24.1961	-17.1708
	0.05		-22.1014	-12.4979	-22.8104	-24.1961	-17.1708
	0.05005		-22.1014	-12.5624	-22.8104	-24.1317	-17.1708
	0.0501		-22.1336	-12.5624	-22.8104	-24.1961	-17.0741
	0.05015		-22.1659	-12.5624	-22.8104	-24.1961	-16.9774
	0.0502		-22.2625	-12.6268	-22.8749	-24.1317	-16.9774
	0.05025		-22.3915	-12.659	-22.8749	-24.0672	-16.9774
	0.0503		-22.3915	-12.6268	-22.8749	-24.035	-16.8807
	0.05035		-22.3592	-12.5624	-22.8749	-24.0028	-16.8807
	0.0504		-22.3915	-12.4979	-22.9393	-24.035	-16.9774
	0.05045		-22.3915	-12.4979	-22.9393	-24.035	-17.0741
	0.0505		-22.3915	-12.4979	-22.9715	-24.035	-17.1708
	0.05055		-22.3592	-12.4979	-23.0038	-24.0672	-17.1708
	0.0506		-22.3915	-12.4979	-23.0038	-24.0672	-17.1708
	0.05065		-22.3592	-12.4979	-23.0038	-24.0672	-17.2352
	0.0507		-22.2625	-12.5624	-23.0038	-24.035	-17.2352
	0.05075		-22.1336	-12.6268	-23.0038	-24.035	-17.2352
	0.0508		-22.2625	-12.6268	-22.9715	-24.035	-17.2352
	0.05085		-22.2625	-12.6268	-22.9393	-24.035	-17.2997
	0.0509		-22.2625	-12.6268	-22.9393	-24.0028	-17.2997
	0.05095		-22.2625	-12.6268	-22.9715	-23.9383	-17.3641
	0.051		-22.2625	-12.6268	-23.0038	-23.9706	-17.3641
	0.05105		-22.2625	-12.6268	-23.036	-23.9706	-17.3641
	0.0511		-22.2625	-12.659	-23.036	-23.9706	-17.3641
	0.05115		-22.1336	-12.7557	-23.036	-23.9706	-17.3641
	0.0512		-22.037	-12.9491	-23.0682	-23.9706	-17.3641
	0.05125		-22.037	-13.1424	-23.0038	-23.9706	-17.3641
	0.0513		-22.037	-13.1424	-23.0682	-23.9706	-17.3641
	0.05135		-22.037	-13.2069	-23.0682	-23.9706	-17.2674
	0.0514		-22.037	-13.3036	-23.0682	-23.9061	-17.3641
	0.05145		-22.037	-13.3036	-23.0682	-23.9061	-17.3963
	0.0515		-22.1336	-13.3036	-23.1971	-23.8739	-17.3963
	0.05155		-22.2625	-13.3036	-23.1971	-23.8094	-17.3963
	0.0516		-22.1336	-13.3036	-23.0682	-23.7772	-17.3963
	0.05165		-22.0692	-13.3036	-23.0038	-23.7772	-17.3963
	0.0517		-22.0047	-13.3036	-23.0682	-23.745	-17.3963
	0.05175		-21.9725	-13.2069	-23.1971	-23.6805	-17.5252
	0.0518		-21.9725	-13.1424	-23.2616	-23.6805	-17.5252
	0.05185		-22.0047	-13.078	-23.2938	-23.6805	-17.5252
	0.0519		-22.0692	-13.078	-23.3582	-23.6805	-17.3963
	0.05195		-22.0692	-13.078	-23.3905	-23.745	-17.3963
	0.052		-22.0692	-13.1424	-23.3905	-23.7772	-17.5252
	0.05205		-22.0047	-13.2069	-23.4227	-23.7772	-17.5252
	0.0521		-22.0692	-13.2069	-23.4227	-23.7772	-17.5252
	0.05215		-22.0692	-13.2069	-23.4227	-23.7772	-17.6542
	0.0522		-22.0692	-13.2069	-23.3905	-23.745	-17.6542
	0.05225		-22.1336	-13.2069	-23.3905	-23.6805	-17.6542
	0.0523		-22.2303	-13.2069	-23.3582	-23.5838	-17.6864
	0.05235		-22.2303	-13.3036	-23.2938	-23.5838	-17.6864
	0.0524		-22.2303	-13.3036	-23.2938	-23.5194	-17.6542
	0.05245		-22.2303	-13.3036	-23.3582	-23.5194	-17.6542
	0.0525		-22.2303	-13.3036	-23.3582	-23.5838	-17.6542
	0.05255		-22.0692	-13.3036	-23.3582	-23.6161	-17.6864
	0.0526		-22.037	-13.3036	-23.3582	-23.6161	-17.6864
	0.05265		-22.037	-13.3036	-23.3905	-23.6161	-17.6542
	0.0527		-22.0692	-13.3036	-23.3905	-23.6161	-17.5252
	0.05275		-22.0692	-13.3036	-23.4227	-23.5194	-17.7186
	0.0528		-22.0692	-13.1424	-23.4549	-23.4549	-17.8153
	0.05285		-22.037	-13.078	-23.4549	-23.4549	-17.7186
	0.0529		-22.0047	-13.0458	-23.4549	-23.4549	-17.7186
	0.05295		-22.0047	-13.0458	-23.4549	-23.4549	-17.7186
	0.053		-22.0047	-13.078	-23.4549	-23.4549	-17.7186
	0.05305		-22.0047	-13.078	-23.4549	-23.4549	-17.7186
	0.0531		-22.037	-13.078	-23.4549	-23.4549	-17.7186
	0.05315		-22.037	-13.078	-23.4549	-23.4549	-17.8153
	0.0532		-22.037	-13.078	-23.4872	-23.4549	-17.8153
	0.05325		-22.037	-13.078	-23.6483	-23.4549	-17.8153
	0.0533		-22.037	-13.1424	-23.6483	-23.4549	-17.8153
	0.05335		-22.037	-13.3036	-23.8094	-23.4549	-17.8153
	0.0534		-22.0692	-13.4325	-23.8739	-23.4549	-17.7186
	0.05345		-22.0692	-13.4325	-23.9383	-23.4549	-17.5252
	0.0535		-22.037	-13.4325	-23.9383	-23.4549	-17.5252
	0.05355		-22.037	-13.4325	-23.9383	-23.4549	-17.5252
	0.0536		-22.037	-13.4325	-23.9383	-23.4549	-17.5252
	0.05365		-22.0047	-13.4325	-24.0028	-23.4549	-17.7186
	0.0537		-21.9725	-13.4325	-24.0028	-23.4549	-17.8153
	0.05375		-21.9725	-13.4325	-24.0028	-23.5194	-17.8153
	0.0538		-22.0047	-13.3036	-24.0028	-23.6161	-17.8153
	0.05385		-22.037	-13.3036	-24.0995	-23.745	-17.7186
	0.0539		-22.037	-13.3036	-24.0995	-23.745	-17.7186
	0.05395		-22.037	-13.3036	-24.1961	-23.745	-17.7186
	0.054		-22.037	-13.3036	-24.2284	-23.8416	-17.7186
	0.05405		-22.0692	-13.3036	-24.2284	-23.8416	-17.5252
	0.0541		-22.0692	-13.3036	-24.2284	-23.745	-17.3963
	0.05415		-22.037	-13.3036	-24.2284	-23.6161	-17.2674
	0.0542		-22.037	-13.3036	-24.2284	-23.5194	-17.2674
	0.05425		-22.1336	-13.4325	-24.1961	-23.4549	-17.0419
	0.0543		-22.037	-13.4647	-24.0995	-23.4549	-16.9452
	0.05435		-22.037	-13.4647	-24.0995	-23.4549	-16.8807
	0.0544		-22.037	-13.5292	-24.0995	-23.4549	-16.784
	0.05445		-22.037	-13.5292	-24.1961	-23.4549	-16.784
	0.0545		-22.037	-13.5292	-24.2284	-23.4549	-16.7196
	0.05455		-22.037	-13.5292	-24.2284	-23.4549	-16.7196
	0.0546		-22.037	-13.4647	-24.2284	-23.4549	-16.7196
	0.05465		-22.037	-13.4647	-24.2928	-23.5194	-16.6874
	0.0547		-22.037	-13.4647	-24.4217	-23.6161	-16.6874
	0.05475		-22.037	-13.4647	-24.4217	-23.6483	-16.6874
	0.0548		-22.0047	-13.4325	-24.4217	-23.6483	-16.6874
	0.05485		-22.0047	-13.3036	-24.4217	-23.6483	-16.6874
	0.0549		-22.037	-13.1424	-24.4217	-23.6483	-16.6874
	0.05495		-22.037	-13.1424	-24.4217	-23.5516	-16.6551
	0.055		-22.1336	-13.1424	-24.4862	-23.5516	-16.6874
	0.05505		-22.037	-13.1424	-24.4862	-23.5516	-16.7196
	0.0551		-22.037	-13.1424	-24.4862	-23.5194	-16.7196
	0.05515		-22.037	-13.1424	-24.4862	-23.5194	-16.7196
	0.0552		-22.037	-13.1424	-24.4862	-23.5194	-16.784
	0.05525		-22.0047	-13.1424	-24.5506	-23.5194	-16.8807
	0.0553		-22.0047	-13.3358	-24.6151	-23.5194	-16.8807
	0.05535		-21.9725	-13.4647	-24.6151	-23.5194	-16.784
	0.0554		-21.9725	-13.4647	-24.6151	-23.5194	-16.7196
	0.05545		-21.9725	-13.4647	-24.6151	-23.5194	-16.6874
	0.0555		-21.9725	-13.4647	-24.5506	-23.5194	-16.6551
	0.05555		-21.9725	-13.4647	-24.5506	-23.5194	-16.6551
	0.0556		-21.9725	-13.4647	-24.5506	-23.5194	-16.6874
	0.05565		-22.0047	-13.4647	-24.5506	-23.4549	-16.6551
	0.0557		-22.0047	-13.4647	-24.5506	-23.5194	-16.5907
	0.05575		-22.0047	-13.4647	-24.5506	-23.5516	-16.5907
	0.0558		-22.0047	-13.4647	-24.5506	-23.5194	-16.5907
	0.05585		-22.037	-13.4647	-24.5506	-23.5194	-16.5907
	0.0559		-22.037	-13.4647	-24.6151	-23.5194	-16.5907
	0.05595		-22.037	-13.4647	-24.6151	-23.4549	-16.5907
	0.056		-22.037	-13.4647	-24.5506	-23.3582	-16.6551
	0.05605		-22.1014	-13.4647	-24.4862	-23.326	-16.6551
	0.0561		-22.1981	-13.4647	-24.4862	-23.2293	-16.6551
	0.05615		-22.2303	-13.4647	-24.4862	-23.1327	-16.6551
	0.0562		-22.2625	-13.4969	-24.4862	-23.1327	-16.6551
	0.05625		-22.2303	-13.4647	-24.4862	-23.1327	-16.5907
	0.0563		-22.1981	-13.4647	-24.4862	-23.1327	-16.5262
	0.05635		-22.1981	-13.4647	-24.4862	-23.1327	-16.5262
	0.0564		-22.1014	-13.2713	-24.4862	-23.2293	-16.494
	0.05645		-22.1014	-13.2713	-24.5184	-23.2293	-16.4618
	0.0565		-22.1014	-13.2713	-24.5184	-23.326	-16.4295
	0.05655		-22.1014	-13.2713	-24.4862	-23.4227	-16.3973
	0.0566		-22.1981	-13.2713	-24.5184	-23.5516	-16.3973
	0.05665		-22.2303	-13.2713	-24.5829	-23.5838	-16.4295
	0.0567		-22.2303	-13.2713	-24.5506	-23.6483	-16.4295
	0.05675		-22.2303	-13.2713	-24.5184	-23.8094	-16.3973
	0.0568		-22.1981	-13.4969	-24.4862	-23.8094	-16.3651
	0.05685		-22.1336	-13.5614	-24.4862	-23.8094	-16.3651
	0.0569		-22.1336	-13.6258	-24.4217	-23.8094	-16.3973
	0.05695		-22.1981	-13.6581	-24.3573	-23.6483	-16.4295
	0.057		-22.1981	-13.6258	-24.2928	-23.5838	-16.4295
	0.05705		-22.1981	-13.5614	-24.1639	-23.5516	-16.4295
	0.0571		-22.1981	-13.4969	-24.1639	-23.4549	-16.4295
	0.05715		-22.2303	-13.2713	-24.035	-23.4549	-16.4295
	0.0572		-22.2625	-13.2713	-24.035	-23.4549	-16.4295
	0.05725		-22.2303	-13.2713	-24.1639	-23.4549	-16.3973
	0.0573		-22.1981	-13.2713	-24.2928	-23.4549	-16.3651
	0.05735		-22.1981	-12.9813	-24.3573	-23.4549	-16.3651
	0.0574		-22.1981	-12.9813	-24.3573	-23.4549	-16.3651
	0.05745		-22.1981	-12.9813	-24.3573	-23.4549	-16.3651
	0.0575		-22.1981	-12.9813	-24.3573	-23.4549	-16.3651
	0.05755		-22.1981	-12.9813	-24.2928	-23.4549	-16.3329
	0.0576		-22.1981	-13.1747	-24.2928	-23.4549	-16.3329
	0.05765		-22.1981	-13.1747	-24.1639	-23.4549	-16.3329
	0.0577		-22.1981	-13.1747	-23.9706	-23.4549	-16.3651
	0.05775		-22.2303	-13.1747	-23.8094	-23.5838	-16.3651
	0.0578		-22.2625	-13.368	-23.7127	-23.6483	-16.3651
	0.05785		-22.2625	-13.4647	-23.7127	-23.6483	-16.3973
	0.0579		-22.2625	-13.4969	-23.7127	-23.5838	-16.4295
	0.05795		-22.2625	-13.4969	-23.7127	-23.5838	-16.4295
	0.058		-22.2948	-13.4969	-23.7127	-23.6483	-16.4618
	0.05805		-22.327	-13.4969	-23.7127	-23.6483	-16.4618
	0.0581		-22.3592	-13.4969	-23.8094	-23.6483	-16.4618
	0.05815		-22.3915	-13.4969	-23.7127	-23.6483	-16.4618
	0.0582		-22.3915	-13.4647	-23.6483	-23.6483	-16.4618
	0.05825		-22.3592	-13.368	-23.6483	-23.6483	-16.4618
	0.0583		-22.327	-13.1747	-23.6483	-23.6483	-16.4618
	0.05835		-22.327	-13.078	-23.5838	-23.5838	-16.4295
	0.0584		-22.2948	-12.8524	-23.4872	-23.3905	-16.4295
	0.05845		-22.2948	-12.8524	-23.4227	-23.3905	-16.4295
	0.0585		-22.327	-12.8524	-23.4227	-23.3905	-16.4295
	0.05855		-22.327	-12.8524	-23.4227	-23.3905	-16.4295
	0.0586		-22.327	-13.078	-23.3905	-23.3905	-16.4295
	0.05865		-22.3592	-13.078	-23.3582	-23.3905	-16.4295
	0.0587		-22.3915	-13.078	-23.3582	-23.3905	-16.4295
	0.05875		-22.4237	-13.1424	-23.3905	-23.3905	-16.4295
	0.0588		-22.3915	-13.2391	-23.4227	-23.3905	-16.4295
	0.05885		-22.3592	-13.1424	-23.4227	-23.3905	-16.4295
	0.0589		-22.3915	-13.1424	-23.3905	-23.3905	-16.4295
	0.05895		-22.3915	-13.1424	-23.3582	-23.3905	-16.4295
	0.059		-22.4559	-13.1424	-23.3582	-23.1649	-16.4295
	0.05905		-22.3915	-13.1424	-23.3582	-23.1649	-16.4295
	0.0591		-22.3915	-13.1424	-23.3582	-23.1649	-16.4618
	0.05915		-22.3915	-13.1424	-23.3582	-23.1649	-16.494
	0.0592		-22.327	-13.1424	-23.3582	-23.1649	-16.494
	0.05925		-22.327	-13.1424	-23.3582	-23.0682	-16.494
	0.0593		-22.327	-13.078	-23.3905	-23.0682	-16.494
	0.05935		-22.327	-12.8524	-23.3905	-23.3905	-16.494
	0.0594		-22.327	-12.5946	-23.3905	-23.3905	-16.494
	0.05945		-22.2303	-12.5946	-23.3582	-23.3905	-16.494
	0.0595		-22.1336	-12.5946	-23.326	-23.3905	-16.494
	0.05955		-22.1336	-12.5946	-23.3582	-23.3905	-16.494
	0.0596		-22.1336	-12.5946	-23.3582	-23.3905	-16.494
	0.05965		-22.1336	-12.8202	-23.3582	-23.3905	-16.494
	0.0597		-22.2303	-13.0458	-23.3582	-23.3905	-16.494
	0.05975		-22.327	-13.0458	-23.3582	-23.3905	-16.494
	0.0598		-22.3915	-13.0458	-23.2938	-23.6483	-16.494
	0.05985		-22.3915	-13.078	-23.2293	-23.7127	-16.494
	0.0599		-22.3915	-13.1424	-23.2293	-23.7127	-16.494
	0.05995		-22.3915	-13.1424	-23.2293	-23.7127	-16.494
	0.06		-22.3915	-13.1424	-23.1971	-23.7127	-16.494
	0.06005		-22.4237	-13.1424	-23.1649	-23.7127	-16.4618
	0.0601		-22.4237	-13.1424	-23.1971	-23.7127	-16.4618
	0.06015		-22.4237	-13.1424	-23.1971	-23.745	-16.4618
	0.0602		-22.3915	-13.1424	-23.1649	-23.8416	-16.4295
	0.06025		-22.3915	-13.1424	-23.1004	-24.1639	-16.3973
	0.0603		-22.3915	-13.0458	-23.1004	-24.1639	-16.3973
	0.06035		-22.3915	-12.7879	-23.1649	-24.4217	-16.3973
	0.0604		-22.4237	-12.5624	-23.1971	-24.4217	-16.3973
	0.06045		-22.4237	-12.5624	-23.2293	-24.4217	-16.3973
	0.0605		-22.3915	-12.5624	-23.2293	-24.4217	-16.4295
	0.06055		-22.327	-12.5624	-23.2616	-24.4217	-16.4618
	0.0606		-22.327	-12.5624	-23.2616	-24.4217	-16.4618
	0.06065		-22.327	-12.7879	-23.2616	-24.4862	-16.494
	0.0607		-22.3915	-13.0458	-23.2616	-24.5506	-16.5262
	0.06075		-22.4237	-12.7879	-23.2616	-24.5829	-16.5262
	0.0608		-22.4237	-12.5624	-23.2616	-24.8729	-16.5262
	0.06085		-22.4237	-12.5624	-23.2293	-25.1952	-16.5262
	0.0609		-22.4237	-12.4979	-23.1649	-25.2596	-16.494
	0.06095		-22.4237	-12.4335	-23.1649	-25.2918	-16.4618
	0.061		-22.6815	-12.4335	-23.1004	-25.3241	-16.4618
	0.06105		-22.9393	-12.4335	-23.1004	-25.3241	-16.494
	0.0611		-22.9393	-12.4335	-23.1649	-25.4207	-16.494
	0.06115		-22.6815	-12.4335	-23.1971	-25.5497	-16.4618
	0.0612		-22.4237	-12.4335	-23.1649	-25.5819	-16.4295
	0.06125		-22.4237	-12.4335	-23.1649	-25.6786	-16.4618
	0.0613		-22.6815	-12.4979	-23.1971	-25.6786	-16.4618
	0.06135		-22.9715	-12.5624	-23.1649	-25.8075	-16.494
	0.0614		-22.9715	-12.5624	-23.1004	-25.8719	-16.5262
	0.06145		-22.7137	-12.5624	-23.1004	-25.8719	-16.5262
	0.0615		-22.7137	-12.5624	-23.036	-25.8719	-16.5907
	0.06155		-22.7137	-12.5624	-23.036	-25.8719	-16.6874
	0.0616		-22.7137	-12.5624	-23.0038	-25.8719	-16.784
	0.06165		-22.7137	-12.5624	-23.0038	-25.9041	-16.8163
	0.0617		-22.9715	-12.5624	-23.0038	-25.8719	-16.8163
	0.06175		-23.0682	-12.5624	-22.9715	-25.8075	-16.8163
	0.0618		-23.2293	-12.5624	-23.0038	-25.6786	-16.9129
	0.06185		-23.3905	-12.5624	-23.0038	-25.6463	-16.8163
	0.0619		-23.5194	-12.5624	-23.0038	-25.6463	-16.8163
	0.06195		-23.7127	-12.5624	-23.0038	-25.743	-16.8163
	0.062		-23.7127	-12.5624	-23.0038	-25.743	-16.8163
	0.06205		-23.7127	-12.4979	-22.9715	-25.743	-16.784
	0.0621		-23.5194	-12.4979	-22.9393	-25.743	-16.6874
	0.06215		-23.3905	-12.6268	-22.9393	-25.743	-16.6551
	0.0622		-23.1649	-12.6268	-22.9393	-25.743	-16.7196
	0.06225		-23.3905	-12.4979	-22.9393	-25.743	-16.7196
	0.0623		-23.5194	-12.4335	-22.9071	-25.743	-16.7196
	0.06235		-23.5194	-12.4979	-22.8426	-25.743	-16.7196
	0.0624		-23.5194	-12.6268	-22.7782	-25.743	-16.7196
	0.06245		-23.3905	-12.6268	-22.7459	-25.8075	-16.784
	0.0625		-23.1649	-12.6268	-22.7782	-25.8075	-16.8163
	0.06255		-23.1649	-12.6268	-22.7782	-25.8075	-16.8163
	0.0626		-23.2938	-12.4979	-22.7782	-25.8075	-16.8163
	0.06265		-23.2938	-12.4979	-22.8426	-25.743	-16.8163
	0.0627		-23.2938	-12.6268	-22.9071	-25.6463	-16.8163
	0.06275		-23.1327	-12.8524	-22.9071	-25.5497	-16.8163
	0.0628		-22.9715	-12.8524	-22.9071	-25.5497	-16.8163
	0.06285		-22.9715	-12.8524	-22.8426	-25.5497	-16.8163
	0.0629		-22.9715	-12.8524	-22.8426	-25.5497	-16.8163
	0.06295		-23.1327	-12.8524	-22.7782	-25.4207	-16.8163
	0.063		-23.2938	-12.8524	-22.7459	-25.4207	-16.8163
	0.06305		-23.2938	-12.8524	-22.7137	-25.4207	-16.8163
	0.0631		-23.2938	-12.8202	-22.6493	-25.4207	-16.784
	0.06315		-23.1327	-12.6268	-22.5848	-25.4207	-16.784
	0.0632		-23.1327	-12.6268	-22.5526	-25.4207	-16.7196
	0.06325		-23.1327	-12.659	-22.3915	-25.4207	-16.7196
	0.0633		-23.1327	-12.659	-22.1981	-25.4207	-16.7196
	0.06335		-23.1327	-12.659	-22.1981	-25.4207	-16.7196
	0.0634		-23.2938	-12.659	-22.3915	-25.5497	-16.7196
	0.06345		-23.1327	-12.659	-22.5526	-25.6463	-16.784
	0.0635		-22.9715	-12.659	-22.5848	-25.6463	-16.8163
	0.06355		-22.9715	-12.659	-22.6493	-25.6463	-16.8163
	0.0636		-23.1327	-12.5946	-22.6815	-25.5497	-16.8163
	0.06365		-23.1004	-12.5946	-22.7137	-25.4207	-16.8163
	0.0637		-22.9715	-12.5946	-22.7137	-25.3241	-16.8163
	0.06375		-22.9715	-12.5301	-22.7137	-25.2918	-16.8163
	0.0638		-23.1004	-12.5301	-22.7137	-25.4207	-16.8163
	0.06385		-23.2293	-12.5946	-22.7137	-25.2918	-16.7518
	0.0639		-23.2293	-12.5946	-22.7137	-25.2596	-16.6551
	0.06395		-23.2293	-12.5946	-22.7137	-25.2596	-16.5907
	0.064		-23.2293	-12.5946	-22.6815	-25.2596	-16.5907
	0.06405		-23.2938	-12.5946	-22.6815	-25.2596	-16.6551
	0.0641		-23.2938	-12.5946	-22.7137	-25.2596	-16.6551
	0.06415		-23.2938	-12.5946	-22.7137	-25.2596	-16.6551
	0.0642		-23.2938	-12.5301	-22.7137	-25.2596	-16.7518
	0.06425		-23.2938	-12.4657	-22.7137	-25.2596	-16.8163
	0.0643		-23.3905	-12.4657	-22.7137	-25.2596	-16.8163
	0.06435		-23.3905	-12.5301	-22.7137	-25.2596	-16.8163
	0.0644		-23.3905	-12.5301	-22.6815	-25.2596	-16.8163
	0.06445		-23.3905	-12.5301	-22.6815	-25.2596	-16.8485
	0.0645		-23.3905	-12.5301	-22.7137	-25.2918	-16.9129
	0.06455		-23.2938	-12.5301	-22.7137	-25.4207	-16.8485
	0.0646		-23.2293	-12.5301	-22.6815	-25.4207	-16.8163
	0.06465		-23.2293	-12.4657	-22.6493	-25.4207	-16.8163
	0.0647		-23.2293	-12.4657	-22.5848	-25.4207	-16.8163
	0.06475		-23.2293	-12.5301	-22.5848	-25.4207	-16.7518
	0.0648		-23.2293	-12.5301	-22.5848	-25.2918	-16.7518
	0.06485		-23.2293	-12.4657	-22.5848	-25.2596	-16.8163
	0.0649		-23.3582	-12.4012	-22.5526	-25.2596	-16.8163
	0.06495		-23.3582	-12.369	-22.4237	-25.2596	-16.7518
	0.065		-23.3582	-12.369	-22.5526	-25.2596	-16.784
	0.06505		-23.2616	-12.369	-22.5526	-25.2596	-16.8163
	0.0651		-23.2616	-12.369	-22.4237	-25.2596	-16.8163
	0.06515		-23.2616	-12.369	-22.5526	-25.2274	-16.8163
	0.0652		-23.2616	-12.369	-22.5526	-25.1629	-16.8163
	0.06525		-23.2616	-12.369	-22.5526	-25.0663	-16.8485
	0.0653		-23.2616	-12.369	-22.5204	-25.0663	-16.9129
	0.06535		-23.2616	-12.369	-22.5204	-24.9696	-16.9452
	0.0654		-23.2616	-12.369	-22.5204	-24.9696	-16.9452
	0.06545		-23.2293	-12.369	-22.5204	-24.9696	-16.9452
	0.0655		-23.2293	-12.369	-22.5526	-24.9696	-16.9774
	0.06555		-23.2616	-12.369	-22.5526	-24.9696	-16.9774
	0.0656		-23.2616	-12.3368	-22.5526	-24.9696	-16.9774
	0.06565		-23.2616	-12.3046	-22.5526	-24.9696	-16.9774
	0.0657		-23.2616	-12.3046	-22.5526	-24.9696	-16.9774
	0.06575		-23.2616	-12.3046	-22.5526	-24.8084	-17.0741
	0.0658		-23.2616	-12.3046	-22.5526	-24.8084	-17.0741
	0.06585		-23.2616	-12.3368	-22.5526	-24.6151	-17.1385
	0.0659		-23.2616	-12.369	-22.5204	-24.5184	-17.203
	0.06595		-23.2616	-12.369	-22.3915	-24.3573	-17.2674
	0.066		-23.2616	-12.369	-22.5204	-24.1961	-17.2674
	0.06605		-23.2616	-12.369	-22.5204	-24.0995	-17.2674
	0.0661		-23.2616	-12.4012	-22.3915	-24.0028	-17.2674
	0.06615		-23.4227	-12.4012	-22.327	-23.9383	-17.2674
	0.0662		-23.6805	-12.369	-22.4237	-23.7772	-17.2674
	0.06625		-23.6805	-12.369	-22.5204	-23.745	-17.2674
	0.0663		-23.4227	-12.3368	-22.4237	-23.745	-17.2674
	0.06635		-23.4227	-12.3046	-22.327	-23.745	-17.203
	0.0664		-23.4227	-12.2723	-22.327	-23.745	-17.1385
	0.06645		-23.4227	-12.2723	-22.2948	-23.745	-17.203
	0.0665		-23.2616	-12.2723	-22.2948	-23.745	-17.203
	0.06655		-23.2293	-12.2723	-22.2948	-23.745	-17.203
	0.0666		-23.2293	-12.2723	-22.327	-23.745	-17.203
	0.06665		-23.2293	-12.2723	-22.327	-23.745	-17.1385
	0.0667		-23.2293	-12.2723	-22.327	-23.8416	-17.0741
	0.06675		-23.0038	-12.2723	-22.4237	-23.8739	-16.9774
	0.0668		-23.0038	-12.2723	-22.4237	-23.8416	-16.9774
	0.06685		-22.7782	-12.2723	-22.5204	-23.8416	-17.0741
	0.0669		-22.5204	-12.2723	-22.5526	-23.6483	-17.1385
	0.06695		-22.5204	-12.2723	-22.5848	-23.6161	-17.203
	0.067		-22.5204	-12.2079	-22.6493	-23.4227	-17.203
	0.06705		-22.7782	-12.2079	-22.7137	-23.4227	-17.3319
	0.0671		-23.0038	-12.2079	-22.7782	-23.4227	-17.3319
	0.06715		-23.1327	-12.1756	-22.8104	-23.4227	-17.3319
	0.0672		-23.1327	-12.1434	-22.8104	-23.4227	-17.2674
	0.06725		-22.9393	-12.0145	-22.8749	-23.3905	-17.3963
	0.0673		-22.7782	-12.0145	-22.9715	-23.3905	-17.3963
	0.06735		-22.7782	-11.8212	-22.9715	-23.5838	-17.3963
	0.0674		-22.7782	-11.7567	-22.9715	-23.8094	-17.3963
	0.06745		-22.7782	-11.7567	-23.0038	-23.8094	-17.3963
	0.0675		-22.7782	-11.7567	-23.0038	-23.8094	-17.3963
	0.06755		-22.8426	-11.7567	-22.9715	-23.8094	-17.3963
	0.0676		-22.7782	-11.8212	-22.9715	-23.8094	-17.3963
	0.06765		-22.4559	-12.0145	-22.9715	-23.8094	-17.3963
	0.0677		-22.1659	-12.0145	-22.9393	-23.8416	-17.3963
	0.06775		-22.4559	-12.0145	-22.9393	-23.8416	-17.3963
	0.0678		-22.7782	-12.0145	-22.9393	-23.8416	-17.3963
	0.06785		-22.8426	-11.8212	-22.9393	-23.8416	-17.3963
	0.0679		-22.9715	-11.8212	-22.9071	-23.8416	-17.3963
	0.06795		-22.9715	-11.8212	-22.9393	-23.8416	-17.4286
	0.068		-22.9715	-11.8212	-22.9715	-23.8416	-17.4608
	0.06805		-22.9715	-11.8212	-23.0038	-23.8416	-17.5252
	0.0681		-22.9715	-11.8212	-23.0038	-23.8416	-17.5252
	0.06815		-22.9715	-12.0145	-23.0682	-23.8416	-17.5252
	0.0682		-22.9715	-11.7889	-23.1649	-23.8416	-17.5252
	0.06825		-22.9715	-11.66	-23.2616	-23.8416	-17.5252
	0.0683		-22.9715	-11.66	-23.326	-23.8416	-17.5252
	0.06835		-22.9715	-11.4667	-23.326	-23.8094	-17.5252
	0.0684		-22.8426	-11.4667	-23.2616	-23.8094	-17.5252
	0.06845		-22.8426	-11.4667	-23.2616	-23.8094	-17.4608
	0.0685		-22.8426	-11.4667	-23.2616	-23.8094	-17.4608
	0.06855		-22.8426	-11.2733	-23.2616	-23.8094	-17.4286
	0.0686		-22.7782	-11.2733	-23.1649	-23.8094	-17.3963
	0.06865		-22.5204	-11.2733	-23.0682	-23.8094	-17.4286
	0.0687		-22.7782	-11.4667	-23.0682	-23.8094	-17.5252
	0.06875		-22.7782	-11.2733	-23.0682	-23.745	-17.5897
	0.0688		-22.7782	-11.2088	-23.0682	-23.5516	-17.5897
	0.06885		-22.7782	-11.2088	-23.0682	-23.5516	-17.7186
	0.0689		-22.7782	-11.2088	-23.1649	-23.5516	-17.8797
	0.06895		-22.7782	-11.2088	-23.2616	-23.5516	-17.9442
	0.069		-22.7782	-11.2088	-23.2616	-23.5516	-18.0086
	0.06905		-22.7782	-11.2088	-23.2616	-23.745	-18.0086
	0.0691		-22.7782	-11.2088	-23.1649	-23.8094	-17.9442
	0.06915		-22.7782	-11.2088	-23.2616	-23.8416	-17.8797
	0.0692		-22.7782	-11.2733	-23.326	-23.8416	-17.7186
	0.06925		-22.5526	-11.4667	-23.2616	-24.0028	-17.5897
	0.0693		-22.1659	-11.2733	-23.1649	-24.0028	-17.5897
	0.06935		-22.1659	-11.2088	-23.1327	-24.0028	-17.5897
	0.0694		-22.1659	-11.2088	-23.1327	-23.9383	-17.5897
	0.06945		-22.1659	-11.2088	-23.1327	-23.9383	-17.5252
	0.0695		-22.1659	-11.2088	-23.1327	-23.8416	-17.5252
	0.06955		-22.1659	-11.2088	-23.1327	-23.8416	-17.5897
	0.0696		-22.5526	-11.2088	-23.1649	-23.8416	-17.5897
	0.06965		-22.5526	-11.2088	-23.2616	-23.8094	-17.5897
	0.0697		-22.5526	-11.2088	-23.326	-23.745	-17.5897
	0.06975		-22.5526	-11.2088	-23.326	-23.5516	-17.7186
	0.0698		-22.5526	-11.2088	-23.3582	-23.5516	-17.7186
	0.06985		-22.5526	-11.2088	-23.3582	-23.745	-17.7186
	0.0699		-22.5526	-11.2088	-23.3582	-23.8094	-17.7186
	0.06995		-22.5526	-11.2088	-23.3582	-23.8416	-17.8797
	0.07		-22.5526	-11.2088	-23.3582	-23.8416	-17.9442
	0.07005		-22.5526	-11.2088	-23.3582	-23.8416	-17.9442
	0.0701		-22.7459	-11.2088	-23.3582	-23.8416	-17.8797
	0.07015		-22.7459	-11.2088	-23.326	-23.8416	-17.7186
	0.0702		-22.7459	-11.2088	-23.3582	-23.8416	-17.7186
	0.07025		-22.7459	-11.2088	-23.3582	-23.8416	-17.8797
	0.0703		-22.7459	-11.2088	-23.4872	-23.8416	-17.8797
	0.07035		-22.7459	-11.2088	-23.4872	-23.8416	-17.8797
	0.0704		-22.7459	-11.2088	-23.4872	-23.8094	-17.7186
	0.07045		-22.7459	-11.2088	-23.3582	-23.8094	-17.8797
	0.0705		-22.7459	-11.2411	-23.326	-23.7772	-17.7186
	0.07055		-22.4881	-11.2411	-23.326	-23.745	-17.5897
	0.0706		-22.0692	-11.2411	-23.326	-23.745	-17.5575
	0.07065		-22.0692	-11.2411	-23.326	-23.745	-17.5575
	0.0707		-22.0692	-11.4344	-23.3582	-23.745	-17.5575
	0.07075		-22.0692	-11.5956	-23.3582	-23.745	-17.5575
	0.0708		-22.0692	-11.5956	-23.3582	-23.745	-17.493
	0.07085		-22.0692	-11.5956	-23.4227	-23.745	-17.493
	0.0709		-22.0692	-11.4344	-23.5194	-23.7772	-17.493
	0.07095		-22.0692	-11.4344	-23.5838	-23.8094	-17.493
	0.071		-22.0692	-11.4344	-23.5838	-23.8094	-17.493
	0.07105		-22.0692	-11.4344	-23.6161	-23.8094	-17.493
	0.0711		-21.5858	-11.2411	-23.6483	-23.8416	-17.493
	0.07115		-21.1346	-11.2411	-23.6805	-23.8416	-17.5575
	0.0712		-20.9413	-11.2411	-23.6483	-23.8416	-17.5897
	0.07125		-20.9413	-11.4344	-23.6161	-23.8416	-17.5575
	0.0713		-20.9413	-11.66	-23.6483	-23.8094	-17.5575
	0.07135		-20.9413	-11.7889	-23.6805	-23.7772	-17.5897
	0.0714		-20.9413	-11.8534	-23.6805	-23.7772	-17.7186
	0.07145		-20.9413	-11.8534	-23.6805	-23.7772	-17.6542
	0.0715		-21.1346	-11.8534	-23.6483	-23.7772	-17.6542
	0.07155		-21.5858	-11.8534	-23.6483	-23.7772	-17.6542
	0.0716		-21.3924	-11.8534	-23.6483	-23.7772	-17.6542
	0.07165		-21.1346	-11.9178	-23.6805	-23.7772	-17.7831
	0.0717		-21.1346	-11.9178	-23.7772	-23.7772	-17.8475
	0.07175		-21.1346	-11.9178	-23.7772	-23.7772	-17.9442
	0.0718		-21.1346	-11.8534	-23.7772	-23.7772	-17.9442
	0.07185		-21.3924	-11.8534	-23.7772	-23.8094	-17.9442
	0.0719		-21.6502	-11.7889	-23.7772	-23.8094	-17.9442
	0.07195		-21.6502	-11.66	-23.7772	-23.8094	-18.0731
	0.072		-21.9725	-11.4989	-23.7772	-23.8094	-18.0731
	0.07205		-21.9725	-11.66	-23.7772	-23.8094	-18.0731
	0.0721		-21.9725	-11.7889	-23.7772	-23.8094	-18.0731
	0.07215		-21.9725	-11.8534	-23.7772	-23.8094	-18.0731
	0.0722		-21.7791	-11.8534	-23.7772	-23.8094	-18.0731
	0.07225		-21.7791	-11.8534	-23.7772	-23.8094	-18.0731
	0.0723		-21.7791	-11.8534	-23.6805	-23.8094	-18.1698
	0.07235		-21.7791	-11.8534	-23.6805	-23.8094	-18.2342
	0.0724		-21.7791	-11.9178	-23.6805	-23.8094	-18.2342
	0.07245		-21.7791	-12.0145	-23.6161	-23.8094	-18.2342
	0.0725		-22.1981	-12.079	-23.5516	-23.8094	-18.2987
	0.07255		-21.7791	-12.1434	-23.5516	-23.8094	-18.4598
	0.0726		-22.1981	-12.1434	-23.5516	-23.8094	-18.5565
	0.07265		-22.2948	-12.1112	-23.4872	-23.8094	-18.5565
	0.0727		-22.2948	-12.079	-23.4872	-23.8094	-18.4598
	0.07275		-22.2948	-12.0145	-23.5516	-23.745	-18.5565
	0.0728		-22.2948	-11.9178	-23.6161	-23.745	-18.5887
	0.07285		-22.2948	-12.0145	-23.6161	-23.7772	-18.5887
	0.0729		-22.2948	-12.0145	-23.6805	-23.8094	-18.5565
	0.07295		-22.2948	-11.9178	-23.6161	-23.8416	-18.4598
	0.073		-22.2948	-11.8534	-23.6161	-23.9383	-18.2987
	0.07305		-22.2948	-11.8534	-23.6805	-23.9383	-18.2342
	0.0731		-22.2625	-11.8534	-23.7772	-23.9383	-18.2342
	0.07315		-22.2625	-11.8534	-23.6805	-23.9383	-18.2342
	0.0732		-22.2625	-11.8534	-23.5838	-23.9383	-18.2342
	0.07325		-22.2625	-11.8534	-23.5838	-23.9383	-18.2342
	0.0733		-22.2625	-11.8534	-23.4872	-24.0672	-18.2987
	0.07335		-22.2625	-11.9178	-23.4872	-24.1317	-18.4598
	0.0734		-22.2625	-11.9178	-23.4872	-24.1317	-18.5565
	0.07345		-22.2948	-11.9178	-23.4549	-24.1317	-18.5887
	0.0735		-22.2948	-11.9178	-23.4549	-24.0672	-18.6854
	0.07355		-22.2948	-11.9178	-23.4872	-24.0672	-18.7499
	0.0736		-22.2948	-11.9178	-23.5838	-24.0672	-18.7499
	0.07365		-22.2625	-11.9178	-23.5838	-24.0672	-18.7499
	0.0737		-22.1659	-11.9178	-23.5838	-24.0672	-18.7499
	0.07375		-22.1659	-11.9178	-23.5838	-24.0995	-18.7499
	0.0738		-22.1659	-11.9178	-23.5838	-24.1317	-18.6854
	0.07385		-22.1659	-11.8534	-23.5838	-24.1317	-18.5887
	0.0739		-22.1659	-11.8534	-23.4872	-24.1317	-18.5565
	0.07395		-22.037	-11.8534	-23.4549	-24.1317	-18.4598
	0.074		-21.9725	-11.8534	-23.4549	-24.1317	-18.2987
	0.07405		-21.8758	-11.8534	-23.4872	-24.0995	-18.2987
	0.0741		-21.8758	-11.8534	-23.5838	-24.0672	-18.2987
	0.07415		-21.9725	-11.8534	-23.5838	-23.9383	-18.2987
	0.0742		-22.037	-11.8534	-23.5838	-23.8416	-18.2987
	0.07425		-22.037	-11.9178	-23.6805	-23.8094	-18.2987
	0.0743		-22.037	-12.0145	-23.7127	-23.7772	-18.1698
	0.07435		-22.037	-12.0145	-23.7127	-23.8094	-18.1376
	0.0744		-22.037	-12.0145	-23.7127	-23.8094	-18.2987
	0.07445		-22.1659	-12.0145	-23.7127	-23.8094	-18.492
	0.0745		-22.2625	-12.0145	-23.7127	-23.9706	-18.2987
	0.07455		-22.2625	-12.0145	-23.7127	-24.0995	-18.2987
	0.0746		-22.1659	-12.079	-23.7127	-24.1317	-18.2987
	0.07465		-22.037	-12.1112	-23.7127	-24.1639	-18.2987
	0.0747		-21.9725	-12.1434	-23.7127	-24.2606	-18.2987
	0.07475		-21.9725	-12.1434	-23.7127	-24.3895	-18.2342
	0.0748		-21.9725	-12.079	-23.7127	-24.454	-18.1376
	0.07485		-21.8758	-12.079	-23.7127	-24.454	-17.9442
	0.0749		-21.7147	-12.079	-23.745	-24.3895	-17.8153
	0.07495		-21.7147	-12.079	-23.8416	-24.2606	-17.7508
	0.075		-21.7147	-12.079	-23.9061	-24.2606	-17.6864
	0.07505		-21.7147	-12.079	-23.9383	-24.2606	-17.5897
	0.0751		-21.7147	-12.079	-24.0028	-24.2606	-17.5897
	0.07515		-21.8758	-12.079	-24.0995	-24.2606	-17.6864
	0.0752		-21.8758	-12.1434	-24.0028	-24.2606	-17.7508
	0.07525		-21.8758	-12.0467	-24.0995	-24.2606	-17.7508
	0.0753		-21.8758	-12.0467	-24.0995	-24.3895	-17.7508
	0.07535		-21.8758	-12.0467	-24.1639	-24.4217	-17.7508
	0.0754		-21.8758	-12.0467	-24.1639	-24.454	-17.8153
	0.07545		-21.8758	-11.9178	-24.1639	-24.454	-17.7508
	0.0755		-21.8758	-11.8534	-24.1639	-24.4862	-17.8153
	0.07555		-21.8758	-11.8534	-24.0995	-24.5184	-17.8797
	0.0756		-21.8758	-11.8534	-24.0028	-24.5829	-18.0409
	0.07565		-21.7147	-11.8534	-24.0028	-24.5829	-17.8797
	0.0757		-21.7147	-11.8534	-24.0995	-24.5829	-17.8475
	0.07575		-21.7147	-11.8534	-24.0995	-24.5829	-17.8475
	0.0758		-21.7147	-11.8212	-24.1639	-24.5829	-17.8797
	0.07585		-21.7147	-11.7245	-24.1961	-24.5829	-17.8475
	0.0759		-21.7147	-11.8212	-24.1961	-24.5829	-17.8153
	0.07595		-21.7147	-11.8212	-24.1961	-24.5184	-17.8153
	0.076		-21.7147	-11.8212	-24.2284	-24.5184	-17.8153
	0.07605		-21.7147	-11.8212	-24.2928	-24.5184	-17.7508
	0.0761		-21.7147	-11.8534	-24.3895	-24.4862	-17.7508
	0.07615		-21.7147	-11.8534	-24.2928	-24.454	-17.6864
	0.0762		-21.7147	-11.8534	-24.2928	-24.454	-17.6864
	0.07625		-21.7147	-11.8534	-24.3895	-24.454	-17.6864
	0.0763		-21.7147	-11.8534	-24.3895	-24.454	-17.7186
	0.07635		-21.7147	-11.8212	-24.2928	-24.454	-17.7186
	0.0764		-21.7147	-11.7245	-24.3895	-24.4862	-17.7186
	0.07645		-21.7147	-11.8212	-24.454	-24.4862	-17.6864
	0.0765		-21.5536	-11.8212	-24.5829	-24.4862	-17.6542
	0.07655		-21.4569	-11.8212	-24.5829	-24.454	-17.6542
	0.0766		-21.4247	-11.7245	-24.5829	-24.3895	-17.6542
	0.07665		-21.5536	-11.5311	-24.5829	-24.3895	-17.5897
	0.0767		-21.5536	-11.5311	-24.7118	-24.3895	-17.5897
	0.07675		-21.5536	-11.4022	-24.7118	-24.3895	-17.3319
	0.0768		-21.5536	-11.4022	-24.5829	-24.2606	-17.1063
	0.07685		-21.5536	-11.4022	-24.454	-24.1639	-17.0419
	0.0769		-21.5536	-11.4022	-24.454	-24.1639	-17.0419
	0.07695		-21.5536	-11.5311	-24.454	-24.1639	-17.0419
	0.077		-21.5536	-11.7245	-24.454	-24.1639	-17.0419
	0.07705		-21.5536	-11.7245	-24.454	-24.1639	-17.0419
	0.0771		-21.5536	-11.7245	-24.454	-24.1639	-17.1063
	0.07715		-21.4247	-11.7245	-24.5829	-24.1639	-17.3319
	0.0772		-21.4247	-11.8212	-24.7118	-24.1639	-17.3319
	0.07725		-21.4247	-11.8534	-24.744	-24.1639	-17.3319
	0.0773		-21.4247	-11.9823	-24.8084	-24.1639	-17.1063
	0.07735		-21.4247	-11.9823	-24.8729	-24.1639	-17.1063
	0.0774		-21.4247	-11.8534	-24.8729	-24.1639	-17.0419
	0.07745		-21.4247	-11.8212	-24.8729	-24.1639	-17.0419
	0.0775		-21.2313	-11.7245	-24.8729	-24.1639	-17.0096
	0.07755		-21.2635	-11.5311	-24.8729	-24.1639	-16.9452
	0.0776		-21.2635	-11.37	-24.9373	-24.1639	-16.7518
	0.07765		-21.2635	-11.3055	-25.034	-24.1639	-16.7518
	0.0777		-21.2635	-11.37	-25.034	-24.1639	-16.9452
	0.07775		-21.2635	-11.37	-25.0663	-24.2606	-16.9452
	0.0778		-21.2635	-11.37	-25.0985	-24.3573	-16.9452
	0.07785		-21.2635	-11.3055	-25.1629	-24.2606	-16.9774
	0.0779		-21.2635	-11.2411	-25.1952	-24.1639	-16.9774
	0.07795		-21.2635	-11.3055	-25.1952	-24.1317	-17.0096
	0.078		-21.2635	-11.3378	-25.1952	-24.035	-17.0419
	0.07805		-21.2635	-11.3378	-25.1952	-24.035	-17.0419
	0.0781		-21.5536	-11.4022	-25.3241	-24.035	-17.0419
	0.07815		-21.2313	-11.4022	-25.5819	-24.035	-17.0419
	0.0782		-21.0057	-11.3378	-25.5819	-24.035	-17.0419
	0.07825		-20.9735	-11.3378	-25.5819	-24.035	-17.0096
	0.0783		-20.9735	-11.3378	-25.5819	-23.8416	-16.9774
	0.07835		-20.9735	-11.2411	-25.5819	-23.8416	-16.9129
	0.0784		-20.9735	-11.1766	-25.5819	-23.8416	-16.7518
	0.07845		-20.9735	-11.1766	-25.5819	-23.8416	-16.5907
	0.0785		-20.8768	-11.1766	-25.5819	-24.035	-16.5585
	0.07855		-20.8768	-11.1766	-25.3241	-24.0672	-16.5262
	0.0786		-20.8768	-11.2411	-25.3241	-24.0672	-16.494
	0.07865		-20.9735	-11.3378	-25.3241	-24.0672	-16.494
	0.0787		-21.1346	-11.3378	-25.3241	-23.8416	-16.494
	0.07875		-21.1024	-11.2411	-25.3241	-23.6805	-16.494
	0.0788		-21.1024	-11.3378	-25.1952	-23.6161	-16.494
	0.07885		-21.1024	-11.3378	-25.3241	-23.6805	-16.5262
	0.0789		-21.1024	-11.3378	-25.5819	-23.8094	-16.5585
	0.07895		-21.1024	-11.3378	-25.5819	-23.8094	-16.5907
	0.079		-21.2313	-11.3378	-25.5819	-23.8094	-16.5907
	0.07905		-21.4569	-11.3378	-25.5819	-23.8094	-16.5907
	0.0791		-22.0047	-11.2411	-25.3885	-23.8094	-16.5907
	0.07915		-21.4569	-11.1766	-25.3885	-23.8094	-16.5907
	0.0792		-21.2313	-11.1766	-25.3885	-23.8094	-16.6551
	0.07925		-21.2313	-11.1766	-25.2596	-23.8094	-16.784
	0.0793		-21.2313	-11.1766	-25.1952	-23.9061	-16.9129
	0.07935		-21.2313	-11.2411	-25.1952	-23.9061	-16.9774
	0.0794		-21.2313	-11.1766	-25.2596	-23.9061	-16.9129
	0.07945		-21.0702	-11.1766	-25.4207	-23.9061	-16.784
	0.0795		-20.8768	-11.1766	-25.6141	-23.9061	-16.6229
	0.07955		-21.0702	-11.1766	-25.743	-23.9061	-16.5585
	0.0796		-21.2313	-11.0799	-25.6141	-23.9061	-16.5262
	0.07965		-21.2635	-11.0799	-25.4207	-23.9061	-16.5262
	0.0797		-21.2635	-11.0799	-25.2596	-23.9061	-16.5585
	0.07975		-21.2635	-10.951	-25.1952	-23.9061	-16.5585
	0.0798		-21.2635	-10.951	-25.0985	-23.9061	-16.6229
	0.07985		-21.2635	-11.0799	-24.9373	-23.9061	-16.8163
	0.0799		-21.8114	-11.0799	-24.8084	-23.9061	-16.8163
	0.07995		-21.8114	-11.0799	-24.744	-23.9061	-16.9774
	0.08		-21.8114	-11.0799	-24.744	-23.9061	-17.0096
	0.08005		-21.8114	-11.0799	-24.7118	-23.9061	-17.0096
	0.0801		-21.2635	-11.0799	-24.6473	-23.9061	-17.0096
	0.08015		-21.2313	-11.0799	-24.6473	-23.9061	-17.0096
	0.0802		-21.2313	-11.0799	-24.7118	-23.9061	-17.0096
	0.08025		-21.2313	-11.0799	-24.7118	-23.9061	-17.0096
	0.0803		-21.2313	-11.1766	-24.7118	-23.9061	-17.0096
	0.08035		-21.2313	-11.1766	-24.744	-23.9061	-17.0096
	0.0804		-21.2313	-11.1766	-24.8084	-23.9061	-17.0096
	0.08045		-21.2313	-11.1766	-24.8084	-23.9061	-17.2352
	0.0805		-21.2635	-11.3055	-24.9373	-23.9061	-17.1063
	0.08055		-21.2635	-11.4344	-25.0985	-23.9061	-17.1063
	0.0806		-21.8114	-11.4989	-25.0985	-23.9061	-17.0096
	0.08065		-22.4237	-11.6278	-24.9373	-23.9061	-16.9774
	0.0807		-22.4237	-11.6278	-24.8407	-23.9061	-17.0096
	0.08075		-22.4237	-11.7567	-24.7762	-23.8094	-17.0096
	0.0808		-22.4237	-11.8212	-24.744	-23.6805	-17.0096
	0.08085		-22.4237	-11.8856	-24.744	-23.6161	-17.0096
	0.0809		-22.4237	-11.8212	-24.744	-23.5838	-17.1063
	0.08095		-22.4237	-11.8212	-24.744	-23.5516	-17.1063
	0.081		-22.4237	-11.8212	-24.744	-23.5516	-17.1063
	0.08105		-22.4237	-11.8212	-24.7118	-23.5516	-17.3319
	0.0811		-22.5204	-11.8212	-24.6473	-23.5516	-17.493
	0.08115		-22.5204	-11.8212	-24.6473	-23.5838	-17.5252
	0.0812		-22.5204	-11.7567	-24.6473	-23.6161	-17.5252
	0.08125		-22.5204	-11.7245	-24.5829	-23.7772	-17.5575
	0.0813		-22.5204	-11.7245	-24.5829	-23.9061	-17.5575
	0.08135		-22.5204	-11.7567	-24.5829	-23.9061	-17.5575
	0.0814		-22.5204	-11.8212	-24.4862	-23.9061	-17.5575
	0.08145		-22.5204	-11.7567	-24.4862	-23.9061	-17.5575
	0.0815		-22.5204	-11.7567	-24.4862	-23.9061	-17.5575
	0.08155		-22.5204	-11.7567	-24.4217	-24.0028	-17.493
	0.0816		-22.617	-11.7567	-24.3895	-24.0028	-17.493
	0.08165		-22.617	-11.7567	-24.3573	-23.9061	-17.5575
	0.0817		-22.617	-11.7245	-24.2928	-23.9061	-17.5575
	0.08175		-22.617	-11.7245	-24.1961	-23.9061	-17.5897
	0.0818		-22.617	-11.7245	-24.1961	-23.9061	-17.7508
	0.08185		-22.617	-11.7245	-24.2928	-23.9061	-17.9442
	0.0819		-22.617	-11.7567	-24.2928	-24.0028	-17.9442
	0.08195		-22.617	-11.7245	-24.2928	-24.0995	-17.9442
	0.082		-22.617	-11.6278	-24.1961	-24.0995	-17.9442
	0.08205		-22.5526	-11.6278	-24.0028	-24.0995	-17.9442
	0.0821		-22.5526	-11.6278	-24.0028	-24.1639	-17.9442
	0.08215		-22.5526	-11.6278	-23.9383	-24.2606	-17.9442
	0.0822		-22.5526	-11.6278	-23.8416	-24.2606	-18.0086
	0.08225		-22.5526	-11.6278	-23.8416	-24.2606	-18.1053
	0.0823		-22.5526	-11.6278	-23.8416	-24.325	-18.2342
	0.08235		-22.5526	-11.6278	-23.8416	-24.325	-18.2342
	0.0824		-22.5526	-11.7245	-23.8416	-24.325	-18.3309
	0.08245		-22.5526	-11.7245	-23.8416	-24.325	-18.5243
	0.0825		-22.5526	-11.7245	-23.8416	-24.325	-18.7176
	0.08255		-22.5526	-11.7245	-23.8416	-24.325	-18.7499
	0.0826		-22.5526	-11.7245	-23.8416	-24.325	-18.7821
	0.08265		-22.5526	-11.7245	-23.8416	-24.325	-18.8465
	0.0827		-22.5526	-11.7245	-23.8416	-24.325	-18.8465
	0.08275		-22.5526	-11.7245	-23.8416	-24.2606	-18.8465
	0.0828		-22.5526	-11.7567	-23.8094	-24.1639	-18.8465
	0.08285		-22.5526	-11.8212	-23.8094	-24.1639	-18.8465
	0.0829		-22.5526	-11.8534	-23.7772	-24.2606	-18.8465
	0.08295		-22.5526	-11.8212	-23.745	-24.325	-18.7821
	0.083		-22.5526	-11.8212	-23.745	-24.325	-18.7499
	0.08305		-22.5204	-11.7567	-23.6805	-24.3895	-18.7499
	0.0831		-22.0692	-11.7245	-23.6483	-24.7118	-18.7821
	0.08315		-22.0692	-11.7245	-23.6483	-25.034	-18.8465
	0.0832		-22.0692	-11.7567	-23.6483	-25.0663	-18.8465
	0.08325		-22.0692	-11.8212	-23.6483	-25.0663	-18.8465
	0.0833		-22.0692	-11.8534	-23.6483	-25.1307	-18.911
	0.08335		-22.0692	-11.8856	-23.6483	-25.1307	-18.9754
	0.0834		-22.0692	-11.9178	-23.6483	-25.1307	-19.0721
	0.08345		-22.0692	-11.9178	-23.6483	-25.1307	-19.1688
	0.0835		-22.0692	-11.9178	-23.6483	-25.1307	-19.2655
	0.08355		-22.4881	-11.9178	-23.6161	-25.1307	-19.2655
	0.0836		-22.5204	-11.8856	-23.6161	-25.1307	-19.2655
	0.08365		-22.5204	-11.8534	-23.6161	-25.1307	-19.1688
	0.0837		-22.5204	-11.8212	-23.6483	-25.1307	-19.201
	0.08375		-22.5526	-11.8212	-23.6483	-25.2274	-19.2655
	0.0838		-22.5526	-11.8212	-23.6483	-25.2274	-19.4266
	0.08385		-22.5526	-11.8212	-23.6483	-25.2274	-19.4266
	0.0839		-22.5526	-11.8212	-23.6483	-25.2274	-19.4266
	0.08395		-22.5526	-11.8534	-23.6483	-25.3241	-19.6522
	0.084		-22.5526	-11.8534	-23.6483	-25.3241	-19.6522
	0.08405		-22.5526	-11.8534	-23.6483	-25.3241	-19.6844
	0.0841		-22.5526	-11.8856	-23.6483	-25.3241	-19.7811
	0.08415		-22.6493	-11.9823	-23.6483	-25.4207	-19.7811
	0.0842		-22.6493	-12.0467	-23.6483	-25.4207	-19.7811
	0.08425		-22.6493	-11.9823	-23.6483	-25.4207	-19.7811
	0.0843		-22.6493	-11.8856	-23.6483	-25.4207	-19.8133
	0.08435		-22.6493	-11.8856	-23.6483	-25.4207	-19.8456
	0.0844		-22.6493	-11.8856	-23.6161	-25.4207	-19.8456
	0.08445		-22.6493	-11.8856	-23.6161	-25.4207	-19.8778
	0.0845		-22.6493	-11.8856	-23.5194	-25.3241	-20.0067
	0.08455		-22.6493	-11.8856	-23.4227	-25.3241	-20.1034
	0.0846		-22.6493	-11.8856	-23.4227	-25.2274	-20.1356
	0.08465		-22.7782	-11.8856	-23.4227	-25.2274	-20.2
	0.0847		-22.8749	-11.8856	-23.4227	-25.2274	-20.2323
	0.08475		-22.8749	-11.8856	-23.5194	-25.1629	-20.2323
	0.0848		-22.8749	-11.8856	-23.5194	-25.1629	-20.2967
	0.08485		-22.8749	-11.8856	-23.5194	-25.1629	-20.2967
	0.0849		-22.8749	-11.8856	-23.5194	-25.1629	-20.2323
	0.08495		-22.8749	-11.8856	-23.6161	-25.1629	-20.2
	0.085		-22.7782	-11.8856	-23.6483	-25.1629	-20.1356
	0.08505		-22.7782	-11.8534	-23.6161	-25.1629	-20.1356
	0.0851		-22.7782	-11.7889	-23.6161	-25.1629	-20.2
	0.08515		-22.7782	-11.7889	-23.6161	-25.0985	-20.2323
	0.0852		-22.7782	-11.8534	-23.5194	-25.0985	-20.2323
	0.08525		-22.7782	-11.7889	-23.326	-25.0985	-20.2967
	0.0853		-22.7782	-11.66	-23.1971	-25.0985	-20.3934
	0.08535		-22.7782	-11.66	-23.1971	-25.0985	-20.4579
	0.0854		-22.7782	-11.66	-23.1971	-25.0985	-20.5223
	0.08545		-22.7782	-11.66	-23.1971	-25.0985	-20.619
	0.0855		-22.6493	-11.5956	-23.1971	-25.0985	-20.619
	0.08555		-22.7782	-11.5633	-23.1971	-25.0985	-20.619
	0.0856		-22.7782	-11.4989	-23.1971	-25.0985	-20.619
	0.08565		-22.7782	-11.4667	-23.1327	-25.034	-20.7157
	0.0857		-22.7782	-11.4667	-23.1971	-25.0018	-20.9413
	0.08575		-22.7782	-11.4667	-23.1971	-25.0018	-21.2313
	0.0858		-22.7782	-11.4667	-23.326	-25.0018	-21.4247
	0.08585		-22.7782	-11.4667	-23.326	-25.0018	-21.5213
	0.0859		-22.7782	-11.4667	-23.326	-25.0018	-21.5213
	0.08595		-22.7782	-11.4667	-23.326	-25.0018	-21.5213
	0.086		-22.7782	-11.4667	-23.1971	-25.0018	-21.5213
	0.08605		-22.7782	-11.4667	-23.1971	-25.0018	-21.5213
	0.0861		-22.6493	-11.4667	-23.326	-25.0018	-21.5536
	0.08615		-22.6493	-11.4667	-23.4549	-25.0018	-21.6502
	0.0862		-22.6493	-11.4667	-23.4549	-25.0018	-21.6502
	0.08625		-22.6493	-11.4989	-23.4549	-24.9696	-21.7147
	0.0863		-22.6493	-11.4989	-23.326	-24.8407	-21.7147
	0.08635		-22.6493	-11.4667	-23.326	-24.744	-21.7147
	0.0864		-22.6493	-11.3378	-23.1971	-24.744	-21.7147
	0.08645		-22.6493	-11.3378	-23.1971	-24.7118	-21.7147
	0.0865		-22.6493	-11.3378	-23.1971	-24.6473	-21.7147
	0.08655		-22.6493	-11.4667	-23.1971	-24.5829	-21.7147
	0.0866		-22.6815	-11.4989	-23.1971	-24.5829	-21.7147
	0.08665		-22.6815	-11.4989	-23.326	-24.5829	-21.6502
	0.0867		-22.6815	-11.4989	-23.4549	-24.5829	-21.5858
	0.08675		-22.6815	-11.4989	-23.4872	-24.5829	-21.5858
	0.0868		-22.6815	-11.4989	-23.4872	-24.5829	-21.6502
	0.08685		-22.6815	-11.5633	-23.4549	-24.5184	-21.5858
	0.0869		-22.6815	-11.5633	-23.4549	-24.454	-21.5536
	0.08695		-22.6815	-11.5956	-23.4872	-24.454	-21.5213
	0.087		-22.6815	-11.5956	-23.5516	-24.454	-21.5213
	0.08705		-22.9715	-11.5956	-23.5516	-24.454	-21.5213
	0.0871		-22.9715	-11.5956	-23.5516	-24.454	-21.5213
	0.08715		-22.9715	-11.5956	-23.4872	-24.454	-21.5213
	0.0872		-22.9715	-11.5956	-23.4872	-24.454	-21.5213
	0.08725		-22.9715	-11.5956	-23.4872	-24.454	-21.5213
	0.0873		-22.9715	-11.5956	-23.4549	-24.454	-21.4891
	0.08735		-22.9715	-11.5956	-23.4549	-24.454	-21.5213
	0.0874		-22.9715	-11.5956	-23.3582	-24.454	-21.5213
	0.08745		-23.1327	-11.5956	-23.2293	-24.454	-21.5213
	0.0875		-23.1649	-11.5956	-23.1971	-24.325	-21.5213
	0.08755		-23.1649	-11.5956	-23.1971	-24.1639	-21.4891
	0.0876		-23.1649	-11.5956	-23.1971	-24.1639	-21.3924
	0.08765		-23.1649	-11.5956	-23.1971	-24.1317	-21.2635
	0.0877		-23.1649	-11.5956	-23.1971	-24.0995	-21.2635
	0.08775		-23.1649	-11.5956	-23.1971	-24.0995	-21.2635
	0.0878		-23.1649	-11.5956	-23.1971	-24.1317	-21.2635
	0.08785		-23.1327	-11.5956	-23.1971	-24.1961	-21.2635
	0.0879		-23.1327	-11.5956	-23.2293	-24.1961	-21.2635
	0.08795		-23.1327	-11.5633	-23.2293	-24.1317	-21.3924
	0.088		-22.9715	-11.4022	-23.2293	-24.1317	-21.4891
	0.08805		-22.9715	-11.5633	-23.3582	-24.0995	-21.4891
	0.0881		-22.9715	-11.5956	-23.4549	-24.0672	-21.4891
	0.08815		-22.9715	-11.5633	-23.4872	-24.035	-21.5536
	0.0882		-22.9715	-11.4022	-23.5838	-23.9706	-21.6502
	0.08825		-22.9715	-11.4022	-23.4872	-23.9706	-21.6502
	0.0883		-22.9715	-11.2733	-23.4872	-23.9706	-21.8114
	0.08835		-22.9715	-11.2411	-23.5194	-23.9706	-21.8114
	0.0884		-22.9715	-11.2088	-23.5194	-23.9706	-21.6502
	0.08845		-23.1327	-11.2088	-23.5194	-23.9706	-21.5536
	0.0885		-23.1327	-11.2088	-23.5194	-23.9706	-21.5536
	0.08855		-23.1649	-11.2411	-23.5194	-23.9706	-21.5536
	0.0886		-23.1649	-11.2733	-23.4872	-23.9706	-21.5536
	0.08865		-23.1649	-11.2733	-23.4549	-23.9706	-21.6502
	0.0887		-23.2616	-11.4022	-23.4549	-23.9706	-21.8114
	0.08875		-23.2616	-11.5633	-23.4872	-23.9706	-21.8114
	0.0888		-23.2616	-11.4022	-23.4549	-23.745	-21.9403
	0.08885		-23.2616	-11.5633	-23.4227	-23.745	-22.0692
	0.0889		-23.2616	-11.5633	-23.326	-23.745	-22.0692
	0.08895		-23.2616	-11.4022	-23.2616	-23.5516	-22.1659
	0.089		-23.1649	-11.4022	-23.2616	-23.5516	-22.1981
	0.08905		-23.1649	-11.4022	-23.326	-23.5516	-22.2625
	0.0891		-23.1327	-11.4022	-23.4227	-23.745	-22.2625
	0.08915		-23.036	-11.4022	-23.4872	-23.745	-22.327
	0.0892		-23.036	-11.2733	-23.5194	-23.745	-22.327
	0.08925		-23.036	-11.2733	-23.5194	-23.745	-22.327
	0.0893		-23.036	-11.2733	-23.5194	-23.5516	-22.327
	0.08935		-23.036	-11.4022	-23.5194	-23.5516	-22.2303
	0.0894		-23.036	-11.4022	-23.5194	-23.5516	-22.1659
	0.08945		-23.1327	-11.4022	-23.4872	-23.5516	-22.0692
	0.0895		-23.2293	-11.4022	-23.4872	-23.745	-21.9403
	0.08955		-23.2293	-11.4022	-23.4872	-23.745	-21.7791
	0.0896		-23.1327	-11.4022	-23.4872	-23.745	-21.5536
	0.08965		-23.1327	-11.4022	-23.4227	-23.745	-21.4891
	0.0897		-23.1327	-11.2733	-23.326	-23.745	-21.3924
	0.08975		-23.1327	-11.2411	-23.326	-23.745	-21.3924
	0.0898		-23.1327	-11.2088	-23.326	-23.745	-21.3924
	0.08985		-23.1327	-11.2088	-23.326	-23.745	-21.2635
	0.0899		-23.1327	-11.1766	-23.326	-23.5516	-21.3924
	0.08995		-23.1327	-11.1766	-23.326	-23.4872	-21.4891
	0.09		-23.2293	-11.1766	-23.326	-23.4227	-21.5536
	0.09005		-23.3582	-11.2088	-23.326	-23.3905	-21.5536
	0.0901		-23.3582	-11.2088	-23.326	-23.3582	-21.5536
	0.09015		-23.3582	-11.2088	-23.4227	-23.3582	-21.5536
	0.0902		-23.3582	-11.2088	-23.4872	-23.3582	-21.5536
	0.09025		-23.3582	-11.2411	-23.4872	-23.3582	-21.4891
	0.0903		-23.3582	-11.2733	-23.4872	-23.3905	-21.3924
	0.09035		-23.3582	-11.2733	-23.4872	-23.3905	-21.2635
	0.0904		-23.3582	-11.2733	-23.4549	-23.3905	-21.1991
	0.09045		-23.3582	-11.2733	-23.326	-23.3905	-21.1668
	0.0905		-23.3582	-11.2733	-23.2616	-23.3905	-21.1668
	0.09055		-23.2293	-11.2733	-23.2616	-23.3905	-21.1668
	0.0906		-23.2293	-11.2733	-23.1971	-23.3905	-21.1668
	0.09065		-23.2293	-11.2733	-23.1971	-23.4227	-21.0702
	0.0907		-23.2293	-11.2733	-23.1971	-23.3905	-20.8446
	0.09075		-23.2293	-11.2733	-23.1971	-23.3582	-20.6834
	0.0908		-23.036	-11.2733	-23.1971	-23.326	-20.6834
	0.09085		-22.8426	-11.2411	-23.1971	-23.326	-20.6834
	0.0909		-22.8426	-11.2411	-23.1971	-23.326	-20.6834
	0.09095		-22.8426	-11.2411	-23.1971	-23.326	-20.6834
	0.091		-22.8426	-11.1766	-23.2616	-23.326	-20.6834
	0.09105		-22.8426	-10.9188	-23.2616	-23.326	-20.6834
	0.0911		-22.8426	-10.9188	-23.2616	-23.326	-20.6834
	0.09115		-22.8426	-10.9188	-23.2616	-23.326	-20.5868
	0.0912		-22.8426	-10.9188	-23.2616	-23.2293	-20.2967
	0.09125		-22.8426	-10.9188	-23.2616	-23.2293	-19.9745
	0.0913		-22.8426	-10.9188	-23.2616	-23.326	-19.9745
	0.09135		-22.8426	-11.1766	-23.2616	-23.3582	-19.9745
	0.0914		-23.036	-11.1766	-23.2616	-23.326	-19.9745
	0.09145		-23.2293	-11.1766	-23.1971	-23.326	-19.9745
	0.0915		-23.3582	-11.1766	-23.1004	-23.3582	-19.9745
	0.09155		-23.3905	-10.9188	-23.1004	-23.4227	-19.9745
	0.0916		-23.3905	-10.661	-23.1004	-23.4227	-19.9745
	0.09165		-23.3582	-10.9188	-23.1004	-23.3582	-19.9745
	0.0917		-23.2293	-10.661	-23.1004	-23.4227	-20.2967
	0.09175		-23.2293	-10.661	-23.1004	-23.5194	-20.5868
	0.0918		-23.036	-10.661	-23.1971	-23.4872	-20.5868
	0.09185		-22.9393	-10.6288	-23.2616	-23.4872	-20.5868
	0.0919		-22.9393	-10.6288	-23.2616	-23.6161	-20.6834
	0.09195		-22.9393	-10.6288	-23.2616	-23.8416	-20.7801
	0.092		-22.9393	-10.6288	-23.2616	-23.8416	-20.7801
	0.09205		-22.8426	-10.6288	-23.2616	-23.8416	-20.6834
	0.0921		-22.8426	-10.6288	-23.2616	-23.8739	-20.5868
	0.09215		-22.9393	-10.6288	-23.2616	-23.8739	-20.2967
	0.0922		-22.9393	-10.6288	-23.2616	-23.8739	-20.2967
	0.09225		-23.036	-10.6288	-23.2616	-23.8739	-20.2967
	0.0923		-23.2616	-10.6288	-23.2616	-23.6805	-20.2967
	0.09235		-23.2616	-10.6288	-23.2616	-23.6805	-19.8133
	0.0924		-23.2616	-10.661	-23.2616	-23.6805	-19.5233
	0.09245		-23.3905	-10.661	-23.2616	-23.6805	-19.4266
	0.0925		-23.3905	-10.661	-23.2616	-23.6805	-19.4266
	0.09255		-23.1649	-10.661	-23.2616	-23.6161	-19.4266
	0.0926		-23.1649	-10.8866	-23.1971	-23.6161	-19.4266
	0.09265		-23.1649	-11.1122	-23.1971	-23.6161	-19.4266
	0.0927		-23.1649	-11.1766	-23.2616	-23.6161	-19.4266
	0.09275		-23.1649	-11.1766	-23.2616	-23.6161	-19.4266
	0.0928		-22.9393	-11.1122	-23.2616	-23.4872	-19.5233
	0.09285		-23.1649	-11.1122	-23.2616	-23.3582	-19.8133
	0.0929		-23.1649	-11.1766	-23.2616	-23.2938	-20.0067
	0.09295		-23.1649	-11.2411	-23.2616	-23.2293	-19.5233
	0.093		-23.4227	-11.2733	-23.1971	-23.2293	-19.4266
	0.09305		-23.4227	-11.2733	-23.1971	-23.2293	-19.5233
	0.0931		-23.4227	-11.2733	-23.1971	-23.2293	-19.5233
	0.09315		-23.4227	-11.2733	-23.1004	-23.326	-19.4266
	0.0932		-23.4227	-11.3055	-22.9393	-23.326	-19.2655
	0.09325		-23.4227	-11.3055	-23.1004	-23.326	-19.2655
	0.0933		-23.4227	-11.4022	-23.1971	-23.326	-19.1688
	0.09335		-23.4227	-11.4022	-23.1004	-23.326	-19.0399
	0.0934		-23.5838	-11.4022	-23.1004	-23.326	-19.0399
	0.09345		-23.5838	-11.4022	-23.1004	-23.326	-19.0399
	0.0935		-23.745	-11.4022	-23.1004	-23.326	-19.0399
	0.09355		-23.745	-11.3055	-23.1971	-23.2293	-19.0399
	0.0936		-23.745	-11.2733	-23.1971	-23.1327	-18.8788
	0.09365		-23.745	-11.2733	-23.1004	-23.1004	-18.7821
	0.0937		-23.5838	-11.2733	-23.1004	-23.1004	-18.6532
	0.09375		-23.5838	-11.2088	-23.1004	-23.1004	-18.6209
	0.0938		-23.5838	-11.2088	-23.1649	-23.1004	-18.6209
	0.09385		-23.4227	-11.1122	-23.2616	-23.1004	-18.6209
	0.0939		-23.3582	-11.1122	-23.326	-23.1004	-18.6209
	0.09395		-23.3582	-11.2088	-23.4549	-23.036	-18.6209
	0.094		-23.4227	-11.2088	-23.4549	-23.1004	-18.6209
	0.09405		-23.4227	-11.2088	-23.326	-23.1004	-18.6209
	0.0941		-23.4227	-11.2088	-23.326	-23.036	-18.6209
	0.09415		-23.4227	-11.2088	-23.326	-22.9715	-18.6209
	0.0942		-23.4227	-11.2733	-23.326	-23.036	-18.6209
	0.09425		-23.4227	-11.3055	-23.326	-23.1004	-18.6209
	0.0943		-23.4227	-11.4022	-23.326	-23.1004	-18.5243
	0.09435		-23.4227	-11.4022	-23.326	-23.1004	-18.3309
	0.0944		-23.4227	-11.4989	-23.326	-23.1004	-18.1053
	0.09445		-23.3582	-11.5633	-23.4549	-23.1004	-18.1053
	0.0945		-23.2938	-11.5633	-23.5838	-23.1004	-18.1053
	0.09455		-23.2938	-11.5633	-23.6805	-23.1004	-18.1053
	0.0946		-23.3582	-11.5633	-23.7127	-23.1004	-18.1053
	0.09465		-23.3582	-11.4989	-23.745	-23.1004	-18.0409
	0.0947		-23.3582	-11.4989	-23.7772	-23.1004	-18.0409
	0.09475		-23.3582	-11.4989	-23.8094	-23.1004	-18.0086
	0.0948		-23.3582	-11.4989	-23.8094	-23.1004	-18.0086
	0.09485		-23.2938	-11.4989	-23.8094	-23.1004	-18.0086
	0.0949		-23.2938	-11.4989	-23.8094	-23.1004	-18.0086
	0.09495		-23.2938	-11.4989	-23.7772	-23.1649	-18.0086
	0.095		-23.2938	-11.4989	-23.7772	-23.1649	-18.0086
	0.09505		-23.1004	-11.4989	-23.8094	-23.1649	-18.0086
	0.0951		-23.1004	-11.5311	-23.9383	-23.1971	-18.0086
	0.09515		-23.1004	-11.5311	-23.9383	-23.1971	-18.0086
	0.0952		-23.1004	-11.5311	-23.9061	-23.2293	-17.8797
	0.09525		-23.1004	-11.5311	-23.9061	-23.326	-17.7508
	0.0953		-23.1004	-11.5633	-23.9061	-23.2293	-17.7508
	0.09535		-23.1004	-11.5633	-23.9061	-23.1971	-17.7508
	0.0954		-23.1004	-11.5633	-23.9061	-23.1649	-17.7186
	0.09545		-23.2938	-11.5633	-23.9061	-23.1649	-17.6864
	0.0955		-23.3582	-11.5633	-23.9061	-23.1649	-17.6864
	0.09555		-23.3582	-11.5633	-23.9061	-23.1004	-17.493
	0.0956		-23.3582	-11.5633	-23.9061	-23.036	-17.493
	0.09565		-23.3582	-11.5633	-23.9061	-22.9715	-17.6864
	0.0957		-23.3582	-11.5633	-23.7772	-22.9715	-17.7186
	0.09575		-23.3582	-11.5633	-23.7772	-22.9715	-17.7186
	0.0958		-23.4227	-11.5633	-23.7772	-23.0038	-17.7186
	0.09585		-23.4872	-11.5633	-23.7772	-23.036	-17.7186
	0.0959		-23.4872	-11.4022	-23.745	-23.1004	-17.7186
	0.09595		-23.4872	-11.5311	-23.745	-23.1649	-17.7186
	0.096		-23.4872	-11.7567	-23.745	-23.1971	-17.7186
	0.09605		-23.4227	-11.8212	-23.745	-23.1649	-17.7186
	0.0961		-23.4227	-11.8212	-23.745	-23.1004	-17.7186
	0.09615		-23.4227	-11.8212	-23.6805	-23.1004	-17.6864
	0.0962		-23.4227	-11.8212	-23.6805	-23.1004	-17.6864
	0.09625		-23.4227	-11.7567	-23.6805	-23.1004	-17.6864
	0.0963		-23.4227	-11.5311	-23.6805	-23.036	-17.6864
	0.09635		-23.4227	-11.5311	-23.6805	-23.036	-17.6864
	0.0964		-23.3582	-11.5311	-23.6805	-23.1004	-17.6864
	0.09645		-23.3582	-11.5311	-23.6805	-23.036	-17.6864
	0.0965		-23.3582	-11.5311	-23.6805	-23.0038	-17.6864
	0.09655		-23.3582	-11.5311	-23.6805	-23.0038	-17.6864
	0.0966		-23.3582	-11.5311	-23.5838	-23.036	-17.493
	0.09665		-23.4227	-11.5311	-23.4549	-23.1004	-17.493
	0.0967		-23.4872	-11.5311	-23.4549	-23.1004	-17.493
	0.09675		-23.4872	-11.5956	-23.4549	-23.036	-17.2997
	0.0968		-23.6483	-11.7567	-23.4549	-23.036	-17.2674
	0.09685		-23.8416	-11.7567	-23.4549	-23.1004	-17.2674
	0.0969		-23.6483	-11.5956	-23.4549	-23.1004	-17.2352
	0.09695		-23.4872	-11.5956	-23.1971	-23.036	-17.2352
	0.097		-23.4227	-11.5956	-23.0038	-23.036	-17.2352
	0.09705		-23.4227	-11.5956	-23.0038	-23.036	-17.2674
	0.0971		-23.4227	-11.5956	-23.0038	-23.0038	-17.2674
	0.09715		-23.4227	-11.5956	-23.1971	-22.9715	-17.2674
	0.0972		-23.4872	-11.5956	-23.4549	-22.9715	-17.2352
	0.09725		-23.4872	-11.5956	-23.4549	-22.9715	-17.2352
	0.0973		-23.4227	-11.5956	-23.4549	-22.9393	-17.2352
	0.09735		-23.4227	-11.5956	-23.4549	-22.9393	-17.203
	0.0974		-23.4227	-11.4022	-23.4549	-22.9393	-17.203
	0.09745		-23.4227	-11.4022	-23.4549	-22.9393	-17.203
	0.0975		-23.4227	-11.4022	-23.4549	-22.9393	-17.203
	0.09755		-23.4872	-11.4022	-23.5838	-22.9393	-17.203
	0.0976		-23.4227	-11.4022	-23.5838	-22.9071	-17.1385
	0.09765		-23.3582	-11.3378	-23.5838	-22.9071	-17.0741
	0.0977		-23.2938	-11.3055	-23.5194	-22.9393	-17.1385
	0.09775		-23.1649	-11.2411	-23.5194	-22.9715	-17.1385
	0.0978		-23.1649	-11.2411	-23.5194	-23.0038	-17.1385
	0.09785		-22.9715	-11.0477	-23.4549	-23.036	-17.1385
	0.0979		-22.9715	-10.8221	-23.4549	-23.1004	-17.1385
	0.09795		-22.9715	-10.8221	-23.4549	-23.1649	-17.2352
	0.098		-22.9715	-10.7577	-23.5194	-23.1649	-17.2674
	0.09805		-22.9715	-10.7577	-23.4549	-23.1649	-17.2674
	0.0981		-23.1649	-10.7577	-23.4549	-23.1649	-17.2674
	0.09815		-23.326	-10.7577	-23.5194	-23.0682	-17.2674
	0.0982		-23.3582	-10.7577	-23.5838	-23.0682	-17.2997
	0.09825		-23.4227	-10.7577	-23.5838	-23.0682	-17.3641
	0.0983		-23.4227	-10.7577	-23.5194	-22.9715	-17.3641
	0.09835		-23.4227	-10.8221	-23.5194	-22.9071	-17.3641
	0.0984		-23.3582	-10.8221	-23.5194	-22.9071	-17.2997
	0.09845		-23.2938	-10.8221	-23.5194	-22.9071	-17.2997
	0.0985		-23.1649	-10.8221	-23.5194	-22.9071	-17.2997
	0.09855		-22.9715	-10.8221	-23.2616	-22.9393	-17.2997
	0.0986		-22.7782	-10.8221	-23.2616	-22.9715	-17.2997
	0.09865		-22.6815	-11.0155	-23.3582	-22.9715	-17.2997
	0.0987		-22.6493	-10.8221	-23.3582	-22.9715	-17.2997
	0.09875		-22.4559	-10.951	-23.3582	-22.9393	-17.2674
	0.0988		-22.2625	-10.951	-23.3582	-22.9393	-17.2674
	0.09885		-22.2625	-10.951	-23.3582	-22.9393	-17.2674
	0.0989		-22.4559	-10.951	-23.3582	-22.9393	-17.2674
	0.09895		-22.4559	-10.951	-23.3582	-22.9393	-17.2674
	0.099		-22.4559	-10.951	-23.3582	-22.9393	-17.2674
	0.09905		-22.4559	-10.951	-23.5194	-22.9715	-17.2674
	0.0991		-22.6493	-10.7577	-23.5194	-22.9715	-17.2674
	0.09915		-22.6815	-10.7577	-23.4549	-23.0038	-17.2674
	0.0992		-22.8749	-10.7577	-23.2938	-23.0038	-17.2674
	0.09925		-23.1971	-10.7577	-23.2938	-23.0038	-17.2997
	0.0993		-23.1971	-10.7255	-23.2938	-23.1004	-17.2997
	0.09935		-23.1971	-10.7255	-23.2938	-23.1004	-17.2997
	0.0994		-23.1971	-10.7255	-23.2938	-23.1004	-17.2997
	0.09945		-23.1971	-10.7255	-23.1971	-23.0038	-17.2997
	0.0995		-23.1971	-10.7255	-23.1004	-22.9715	-17.2997
	0.09955		-23.3582	-10.7255	-23.0038	-22.9393	-17.2997
	0.0996		-23.1971	-10.7255	-23.0038	-22.8749	-17.2997
	0.09965		-22.9071	-10.7255	-22.9715	-22.8749	-17.3641
	0.0997		-22.9071	-10.7577	-22.9393	-22.8749	-17.5575
	0.09975		-22.7137	-10.7577	-22.9393	-22.9393	-17.8153
	0.0998		-22.6815	-10.8866	-22.9393	-22.9715	-17.8153
	0.09985		-22.7137	-10.8866	-22.9393	-22.9715	-17.8153
	0.0999		-22.7137	-10.8866	-22.9393	-23.0038	-17.8153
[truncated: 198,003+ more rows]
