# Supplementary material for: Dopaminergic regulation of vestibulo-cerebellar circuits through unipolar brush cells
Source: eLife journal article supplement (doi:10.7554/elife.76912), 2022-04-27
Supplement: supp [file elife-76912-supp-v1.zip]

Archive with 17 entries (17 files):
- elife_poa_e76912_Transparent_Reporting_File.pdf
- elife_poa_e76912_Figure_1_Figure_supplement_1.ai
- elife_poa_e76912_Figure_2_figure_supplement_1.ai
- elife_poa_e76912_Figure_3_figure_supplement_1.ai
- elife_poa_e76912_Figure_5_figure_supplement_1.ai
- elife_poa_e76912_Figure_7_figure_supplement_1.ai
- elife_poa_e76912_Figure_1_source_data_1.xlsx
- elife_poa_e76912_Figure_1_figure_supplement_1_source_data_1.xlsx
- elife_poa_e76912_Figure_2_source_data_1.xlsx
- elife_poa_e76912_Figure_2_figure_supplement_1_source_data_1.xlsx
- elife_poa_e76912_Figure_3_source_data_1.xlsx
- elife_poa_e76912_Figure_3_figure_supplement_1_source_data_1.xlsx
- elife_poa_e76912_Figure_4_source_data_1.xlsx
- elife_poa_e76912_Figure_5_source_data_1.xlsx
- elife_poa_e76912_Figure_5_figure_supplement_1_source_data_1.xlsx
- elife_poa_e76912_Figure_6_source_data_1.xlsx
- elife_poa_e76912_Figure_7_source_data_1.xlsx
