# Supplementary material for: Dopaminergic regulation of vestibulo-cerebellar circuits through unipolar brush cells
Source: eLife journal article supplement (doi:10.7554/elife.76912), 2022-04-27
Supplement: supp [file elife-76912-supp-v1.zip › elife_poa_e76912_Figure_1_figure_supplement_1_source_data_1.xlsx]

## Sheet: Fig 1 S1 A
tdT cells with Tbr2	Tbr2 cells with tdT		tdT cells with mGlur1	Mglur1 cells with tdT		tdT cells with CR	CR cells with tdT
178/510	510/510		401/609	401/571		48/384	48/899

## Sheet: Fig 1 S1 B
	Sex	Postnatal days
			proportion expressing Drd1 mRNA	Total number of Tdt+ cells counted
Mouse 1	Female	55	0.84	622
Mouse 2	Female	55	0.71	328
Mouse 3	Female	25	0.7	818
Mouse 4	Male	25	0.65	767

## Sheet: Fig 1 S1 C
Number of Puncta	Numbe of tdT+ cells
0	608
1	684
2	481
3	329
4+	253

## Sheet: Fig 1 S1 D
puncta_in_cell_per_micron	puncta_out_of_cell_per_micron
0.00108651	8.51654e-05
0.00280931	8.51654e-05
0.0117521	5.18118e-05
0	5.18118e-05
0	0.000118315
0	5.89065e-05
0.000701947	7.75977e-05
0.00344336	5.16816e-05
0.0013832	4.80366e-05
0.00713055	4.80366e-05
0.0102982	0.000224624
0	1.84245e-05
0.0134329	2.20909e-05
0.00322246	9.30111e-05
0.00242054	9.30111e-05
0.00124103	9.30111e-05
0.00899006	4.80596e-05
0.00100236	4.80596e-05
0.00442433	3.32478e-05
0.00747136	7.39156e-06
0.0031513	0.000118912
0	0.000118912
0.00356334	0.000118912
0.00100892	0
0	0
0.00256595	1.47906e-05
0	1.47906e-05
0.00263591	7.0439e-05
0.00205668	7.0439e-05
0.00187028	7.0439e-05
0	0.000173465
0.00570754	0.000173465
0.0040684	0.00012224
0.00185363	0.00012224
0.00369784	0.00012224
0.00732955	0.00012224
0	3.68592e-06
0.00125678	3.68982e-06
0	3.68982e-06
0.000939413	2.62439e-05
0.000426683	0.000115733
0.000540801	0.000115733
0.00501909	2.98746e-05
0.00287435	2.98746e-05
0	2.98746e-05
0.00358203	2.98746e-05
0.00439815	4.06156e-05
0.00372249	4.06156e-05
0.0031604	5.5641e-05
0.00113181	5.5641e-05
0.000647809	8.93696e-05
0.00117352	8.93696e-05
0.00361153	8.93696e-05
0.00280039	6.67614e-05
0	6.67614e-05
0	6.67614e-05
0.0105867	9.59879e-05
0.00124099	9.59879e-05
0.0185408	1.84154e-05
0.00470654	3.32557e-05
0.00248251	3.32557e-05
0.00134986	2.58007e-05
0	1.12516e-05
0.00335111	1.12516e-05
0	1.12516e-05
0	1.12516e-05
0	1.12516e-05
0.000632391	1.12516e-05
0.00136208	1.12516e-05
0.00378428	3.31832e-05
0	3.31832e-05
0.00297076	3.31832e-05
0.00286218	1.4741e-05
0.00230402	7.79959e-05
0.00164178	7.79959e-05
0.00086704	7.79959e-05
0.00164018	7.79959e-05
0.00139336	2.9484e-05
0.00759967	1.84056e-05
0.0025394	6.2688e-05
0.0042301	6.2688e-05
0.00550082	0.000211071
0	1.8455e-05
0.00307276	2.59208e-05
0.00287403	2.59208e-05
0.00354964	6.2683e-05
0.00717129	5.88728e-05
0	0.00015523
0.00550515	0.00015523
0.000423089	5.95807e-05
0.00156642	5.95807e-05
0	5.95807e-05
0.0044256	8.95866e-05
0	8.95866e-05
0.00155429	8.95866e-05
0.000869329	8.95866e-05
0	0
0.00116156	0
0	2.20791e-05
0.0158442	6.2843e-05
0.0139245	6.2843e-05
0	6.2843e-05
0.021161	5.89148e-05
0.00211982	4.08411e-05
0.00338111	4.08411e-05
0.00382106	4.08411e-05
0.00354719	4.08411e-05
0.00551934	6.31621e-05
0	6.31621e-05
0.003493	6.31621e-05
0.00308601	6.31621e-05
0	0.000111083
0.00650002	0.000111083
0	0.000111083
0	0.000111083
0.0131975	9.71825e-05
0.00152194	9.71825e-05
0.0020575	9.71825e-05
0.00383781	9.71825e-05
0	9.71825e-05
0	9.71825e-05
0	7.02502e-05
0.00161245	7.02502e-05
0	4.78871e-05
0.00525259	0.000156521
0	0.000156521
0.000873329	0.000156521
0.00275435	0.000156521
0.00718701	0.000103345
0.0084723	4.78266e-05
0.00651357	0.000111216
0.00273975	0.000111216
0.00179257	0.000111216
0.00428467	8.84653e-05
0	8.84653e-05
0.00230333	0.000209854
0.0078452	0.000111071
0	0.000111071
0.00276218	0.000111071
0	4.46447e-05
0.0012918	4.46447e-05
0.00340015	4.46447e-05
0	4.46447e-05
0.00965028	0.000106801
0.00422964	7.47247e-05
0	7.47247e-05
0.00360764	7.47247e-05
0.00455573	7.47247e-05
0.00534861	7.47247e-05
0.00509947	7.47247e-05
0.00214174	7.47247e-05
0	7.47247e-05
0	8.8355e-05
0.00244784	6.65665e-05
0	6.65665e-05
0.00321708	9.30356e-05
0.000752114	9.30356e-05
0	9.30356e-05
0.00215751	9.30356e-05
0.00272918	5.99449e-05
0	5.99449e-05
0.000575377	5.99449e-05
0.000583967	5.99449e-05
0	5.99449e-05
0.00458419	0.000136222
0.00503928	0.000106903
0.00786121	0.000106903
0.00219519	0.000122345
0.00123309	0.000122345
0.00189344	0.000122345
0.0276879	7.36968e-05
0.00335126	7.36968e-05
0	0.000125417
0.00229824	0.000125417
0	9.58675e-05
0.00401289	9.58675e-05
0.00271093	9.58675e-05
0.0167629	8.1255e-05
0	8.1255e-05
0.0137374	4.79352e-05
0.0081974	4.79352e-05
0.00405684	9.57438e-05
0.0117481	8.46489e-05
0.00146088	3.68505e-05
0.00355177	0.000106819
0	7.38505e-05
0	6.61995e-05
0.00190129	4.08799e-05
0	4.08799e-05
0.00124355	4.08799e-05
0.00290469	9.56914e-05
0.00160827	9.24676e-05
0.0022593	9.24676e-05
0	0.000152001
0.00182698	0.000152001
0.00424993	6.25965e-05
0.00433156	7.74595e-05
0.00802579	7.74595e-05
0.00605561	4.05912e-05
0.00356524	4.05912e-05
0.00769478	5.88687e-05
0.00212263	5.15502e-05
0	6.62946e-05
0.00110306	0.000103266
0.00135034	2.58007e-05
0.00184617	2.95839e-05
0.030773	2.95839e-05
0.00322166	2.95839e-05
0	2.95839e-05
0.00462444	1.10858e-05
0.00254586	1.10858e-05
0.00279045	0.000101107
0.00524902	0.000101107
0.00598536	0.000101107
0.00111798	0.000101107
0	0.000101107
0.00159813	0.000101107
0	5.5646e-05
0.00372801	5.5646e-05
0.00409271	5.5646e-05
0	5.5646e-05
0.00915004	6.33792e-05
0.00777868	6.33792e-05
0.00143136	6.33792e-05
0	6.33792e-05
0.00128994	6.33792e-05
0.00834537	6.99322e-05
0.00345458	4.46727e-05
0.000967476	4.46727e-05
0.00203501	4.46727e-05
0.00732537	4.46727e-05
0	3.33442e-05
0	3.33442e-05
0	3.33442e-05
0	3.33442e-05
0.0133975	3.33442e-05
0	3.33442e-05
0.00240153	8.49254e-05
0.00494501	8.49254e-05
0.0335462	9.21452e-05
0.00587627	9.21452e-05
0.0045254	2.94781e-05
0	6.99734e-05
0.0157213	5.15332e-05
0	7.36078e-06
0.002333	0.000116154
0.000628071	0.000116154
0.000538684	0.000116154
0.00366303	0.000115963
0.0027008	0.000115963
0	0.000115963
0.0011018	0.000115963
0.000616533	5.95616e-05
0.00444528	5.95616e-05
0	9.31577e-05
0.00213675	9.31577e-05
0.00243739	9.31577e-05
0.00610719	9.31577e-05
0.00424705	9.31577e-05
0.00190817	2.97358e-05
0.00120427	2.97358e-05
0.00323471	4.10936e-05
0.00353498	4.10936e-05
0.000437811	4.10936e-05
0.0155762	8.18293e-05
0.0047314	8.18293e-05
0.00127683	8.18293e-05
0	8.18293e-05
0.00595097	4.4246e-05
0.00469347	5.90437e-05
0	5.21842e-05
0	5.21842e-05
0.00372826	5.21842e-05
0.00567698	8.12427e-05
0.00137144	8.12427e-05
0.00242077	7.39767e-05
0.00229975	7.39767e-05
0.00101982	7.77519e-05
0.00244714	6.99449e-05
0.00730606	7.00159e-05
0	7.7616e-05
0.0047622	5.93705e-05
0.00148464	5.93705e-05
0.00159578	5.93705e-05
0.00266764	8.48939e-05
0.0031411	7.07072e-05
0.00450955	7.07072e-05
0	8.10725e-05
0.000907968	0.000129175
0.0028532	0.000147024
0	0.000147024
0.000923684	0.000147024
0.00313395	0.000147024
0.00190959	0.000147024
0	8.11176e-05
0.00759168	8.11176e-05
0.00307902	4.41621e-05
0	7.39791e-05
0.00230471	8.15318e-05
0.00148172	8.15318e-05
0.00098693	9.30303e-05
0.00341983	9.30303e-05
0.00422485	9.30303e-05
0.00168133	0.000108367
0.00195002	0.000108367
0.00108993	0.000108367
0.00250963	0.000108367
0.00326451	9.6846e-05
0	9.6846e-05
0.00317952	9.6846e-05
0.00118456	9.6846e-05
0	7.1403e-05
0.00382457	7.1403e-05
0	7.1403e-05
0.00217168	7.1403e-05
0	7.1403e-05
0.0019768	7.1403e-05
0.00213693	8.57473e-05
0.000932583	8.57473e-05
0.00328782	8.57473e-05
0.00333151	8.57473e-05
0.00103954	8.60468e-05
0.00465101	8.60468e-05
0.00348878	8.60468e-05
0.000900308	8.60468e-05
0.00207317	9.35311e-05
0.00321453	9.35311e-05
0.00311311	9.35311e-05
0	9.35311e-05
0.00248871	9.35311e-05
0.00432039	9.35311e-05
0.00192475	9.35311e-05
0.00282451	7.92164e-05
0.00572592	7.92164e-05
0	7.92164e-05
0.000737685	7.92164e-05
0	7.92164e-05
0.00108759	7.92164e-05
0	7.92164e-05
0.00650719	0.000134248
0.00138684	0.000134248
0.0034665	0.000134248
0.00129986	8.26888e-05
0	8.26888e-05
0	8.26888e-05
0.00127868	8.26888e-05
0.00128001	8.26888e-05
0.006367	8.26888e-05
0.0094382	8.26888e-05
0.00432423	0.000107679
0.00220436	0.000107679
0	0.000107679
0	0.000107679
0.00320397	8.25129e-05
0	8.25129e-05
0.00113698	8.25129e-05
0	8.25129e-05
0.0075867	8.25129e-05
0.0025663	8.25129e-05
0.00179016	8.25129e-05
0.00218442	8.25129e-05
0.00146466	8.25129e-05
0.00535852	0.000119307
0.00503017	0.000119307
0.0019093	0.000119307
0.00120482	0.000119307
0.0082802	0.000119307
0.00155888	0.000119307
0.00532446	0.000119307
0.00445253	7.36372e-05
0.000318506	7.48977e-05
0.000531718	7.48977e-05
0.00267666	6.30023e-05
0.00582431	6.30023e-05
0.00259063	6.30023e-05
0	6.30023e-05
0	6.26905e-05
0.00165327	7.36794e-05
0.000926527	7.38084e-05
0.000737506	0.000175384
0.00112968	7.02237e-05
0.00428563	7.02237e-05
0	7.02237e-05
