# Supplementary material for: Dopaminergic regulation of vestibulo-cerebellar circuits through unipolar brush cells
Source: eLife journal article supplement (doi:10.7554/elife.76912), 2022-04-27
Supplement: supp [file elife-76912-supp-v1.zip › elife_poa_e76912_Figure_1_source_data_1.xlsx]

## Sheet: Fig 1 c_d_e
Figure 1c
All Cells	510
TdT	178
tbr2	510
Both	178
tbr2 only	332
Tdt only	0
Figure 1d
All Cells	779
TdT	571
Mglur1	609
Both	401
Mglur1 only	208
Tdt only	170
Figure 1e
All Cells	1235
TdT	899
CR	384
Both	48
CR only	336
Tdt only	851

## Sheet: Fig 1 f
Number of Puncta	Number of tdT+ cells
0	608
1	684
2	481
3	329
4+	253
Total Cells	2355
