# Supplementary material for: Dopaminergic regulation of vestibulo-cerebellar circuits through unipolar brush cells
Source: eLife journal article supplement (doi:10.7554/elife.76912), 2022-04-27
Supplement: supp [file elife-76912-supp-v1.zip › elife_poa_e76912_Figure_2_figure_supplement_1_source_data_1.xlsx]

## Sheet: Fig 2 S1A
		Cells firing rate
	Time (Seconds)
	20		0	0	0	0.214286	0	5.71429	21.5714	0	0	7.57143	15.4286	0.357143	13.7857
	40		0.142857	0	0	0.357143	0	3.07143	13.5714	0	0	6.21429	10.2857	0	8
	60		0.142857	0	0	0.285714	0	2.07143	19.1429	0	0	5.5	5.21429	0	6.42857
	80		1.71429	0	0	0.357143	0	0	16.6429	0	0	4.42857	3.07143	0	6.14286
	100		0.428571	0	0	1	0	0	13.7143	0	0	5.21429	2.28571	0	7.14286
	120		2	0	0	0.5	0	0	12	0	0	5.78571	1.21429	0	7.35714
	140		2.42857	0	0	1.07143	0	0.714286	11.9286	0	0	6.42857	0.285714	0	7.21429
	160		1.07143	0	0	1	0	1.42857	12.0714	0	0	5.71429	0.428571	0	5.71429
	180		1.28571	0	0	0.714286	0	2.14286	11.5	0	0	5.35714	0.571429	0	6.35714
	200		0.357143	0	0	0.714286	0	4.64286	15	0	0	6.28571	0	0	5.42857
	220		1.21429	0	0	1	0.0714286	5.28571	11.2857	0	0	5.57143	0.285714	0	4.92857
	240		1.64286	0	0	0.142857	0.0714286	6.21429	11.1429	0	0	4.57143	6.64286	0	5
	260		0.214286	0	0	0.642857	0	6.35714	12.3571	0	0	4.85714	0	0	5.14286
	280		0.642857	0	0	0.928571	0	7.14286	14.1429	0	0	3.92857	0	0	5.64286
	300		0.642857	0	0	0.785714	0.142857	8.14286	8.07143	0	0	3.57143	0	0	5
	320		0	0	0	0.928571	0.0714286	8.92857	6.85714	0	0.0714286	3.14286	0	0	4.85714
	340		0	0	0	1.42857	0.285714	9.71429	6.64286	0	0	3.14286	0	0	4.78571
	360		0	0	0	0.714286	0.142857	10.6429	7.5	0	0	2.64286	0	0	4.78571
	380		0	0	0	1.78571	0	10.7143	7.21429	0	0	2.64286	0	0	5.42857
	400		0	0	0	1.78571	0	11.4286	7	0	0	3.85714	0	0	4.92857
	420		0	0	0	0.285714	0.214286	11.7857	6.85714	0	0	2.71429	0	0	4.78571
	440		0.785714	0	0	0	0	12.5	6.14286	0	0	2.85714	0	0	3.85714
	460		0	0	0	0	0.571429	13.2143	5.71429	0	0	3.07143	0.285714	0	5.57143
	480		0.142857	0	0	0	0.357143	14.2857	7.42857	0	0	3.64286	0	0	5.21429
	500		0	0	0	0	0.428571	14.3571	5.64286	0	0	2.78571	0.428571	0	4.78571
	520		0	0	0	0	0.5	14.8571	6	0	0	3.21429	0	0	4.78571
	540		0	0	0	0.642857	0.428571	13.7857	9.35714	0	0	2.14286	0.0714286	0	4.07143
	560		0	0	0	0.142857	0.571429	14.3571	8.42857	0	0	2.64286	0	0	4.64286
	580		0	0	0	0.142857	0.142857	14.6429	9.64286	0	0	2.78571	0	0	7.07143
	600		0	0	0	0.428571	0.142857	14.7857	8.85714	0	0	4	0	0	5.71429
	620		0	0	0	0.142857	0.357143	14.6429	6.71429	0	0	3	0	0	5.21429
	640		0	0	0	0.928571	0.428571	13.2143	7	0	0	2.78571	0	0	5.5
	660		0	0	0	1.42857	0.285714	5.78571	9.07143	0	0	2.92857	0	0	6.28571
	680		0	0	0	2.21429	0.571429	0.928571	7.57143	0	0	3.21429	0	0	4.64286
	700		0	0	0	4	0	0.642857	8.64286	0	0.571429	3.21429	0	0	4.57143
	720		0	0	0	3.21429	0	0.357143	10.4286	0	0	3.14286	0	0	2.5
	740		0	0	0	2.07143	0.0714286	0	8.35714	0	0	3.14286	0	0	3.57143
	760		0.285714	0	0	3.5	0	0	11.7857	0	0	3.14286	0.0714286	0	3.28571
	780		0.214286	0	0	2.78571	0	0	9.14286	0	0	2.64286	0.714286	0	2.85714
	800		0	0	0	3.57143	0.214286	1.07143	8.14286	0	0	2.85714	1.71429	0	1.64286
	820		0	0	0	3.64286	0.357143	1.28571	7.78571	0	0	2.71429	1.92857	0	3.07143
	840		0	0	0	3.35714	1.07143	1.92857	7.78571	0	0	3.21429	0.285714	0	2.85714
	860		0	0	0	4.71429	1.14286	2.71429	9.14286	0	0	3	1.28571	0	2.28571
	880		0	0	0	3.5	1.64286	3.57143	10.1429	0	0	3	0.357143	0	3.57143
	900		0	0	0	3.57143	1.07143	4.28571	10	0	0	2.92857	0.142857	0	2.42857
	920		0	0	0	4.64286	1.57143	4.85714	8.57143	0	0	2.78571	1.07143	0	2.71429
	940		0.0714286	0	0	1.21429	1.57143	5.92857	10.7857	0	0	2.78571	0.571429	0	2.35714
	960		0	0	0	1.35714	1.78571	6.92857	6.78571	0	0	2.07143	2.14286	0	2.85714
	980		0	0	0	1.35714	1.64286	8.07143	8.42857	0	0	2.71429	1.14286	0	3.35714
	1000		0	0	0	2.5	1.21429	8.42857	9.14286	0	0	3.21429	1.71429	0	3.57143
	1020		0	0	0	3.42857	1.78571	8.71429	8.5	0	0	3.42857	1.14286	0	2.21429
	1040		0	0	0	3.14286	2.07143	8.92857	9.71429	0	0	3.5	0.714286	0	1.57143
	1060		0	0	0	4.14286	1.5	9.21429	7.92857	0	0	2.71429	1.35714	0	2.42857
	1080		0	0	0	4.57143	1.5	9.71429	6.85714	0	0	2.71429	0.642857	0	2.14286
	1100		0	0	0	4.21429	1	9.92857	9	0	0	2.42857	1.28571	0	1.28571
	1120		0	0	0	5.14286	1.57143	10.1429	7.21429	0	0	3.92857	3.28571	0	1.78571
	1140		0	0	0	5.21429	0.571429	10.7143	7.71429	0	0	3.71429	4.07143	0	1.92857
Drug Application	1160		0	0	0	5.35714	1.78571	10.8571	8.07143	0	0	3.35714	3	0	3.07143
	1180		0	0	0	6.28571	1.71429	10.5	8.07143	0	0.0714286	2.64286	1.14286	0	3
	1200		0	0	0	6.14286	1.35714	10.6429	7.57143	0	0.571429	4.28571	3.35714	0	2.07143
	1220		0	0	0	6.92857	1.14286	9.14286	7.64286	0	0.714286	3.85714	2.92857	0	2.71429
	1240		0	0	0	6.35714	1.5	7.42857	12.5	0	0	3.85714	4.71429	0	6.92857
	1260		0	0	0	6.78571	0.357143	7.35714	12.7143	0	0	3.85714	3.57143	0	7.71429
	1280		0	0	0	7.42857	1.78571	7.07143	15.2143	0	0	4.92857	3	0	7.85714
	1300		0	0	0	8.21429	1.71429	6.5	20.1429	0	0	4.5	2.92857	0	8.64286
	1320		0	0	0	8.42857	1.21429	6.07143	22	0	0	4.14286	1.78571	0	8.85714
	1340		0	0	0	8	1.64286	5.64286	27.1429	0	0	5.57143	1.42857	0	10.5
	1360		0	0	0.285714	8.92857	2.28571	5.57143	23.5	0	0	4.57143	2.64286	0	8.57143
	1380		0.214286	0	0.142857	8.78571	2.14286	5.42857	12.0714	0	0	4.92857	1.42857	0	9.78571
	1400		0.0714286	0	1.07143	10.4286	1.21429	5.21429	8.64286	0	0	5.57143	5.28571	0	10.4286
	1420		2.07143	0	0.785714	10.9286	1.28571	5.42857	8.64286	0	0	4.64286	4.71429	0	10.4286
	1440		2.14286	0	0.785714	11.7857	0.928571	5.28571	10.2857	0	0	5.21429	4.28571	0	9.85714
	1460		2.28571	0	2.64286	10.7857	1.85714	5.71429	11.7143	0	0	4.35714	3.92857	0	9.14286
	1480		2.5	0	2.42857	10.1429	2.07143	5.5	9.28571	0	0	3.57143	14.5	0	8.92857
	1500		2.5	0	3.14286	10.2143	1.64286	5.28571	5.92857	0	0.0714286	4.64286	11.2143	0	8.85714
	1520		5.5	0	2.42857	10.6429	1.71429	5.21429	12.7143	0	0	4.57143	9.14286	0	10
	1540		9.35714	0	3.42857	10.7143	1.57143	5.35714	11	0	0	3.71429	10	0	9.92857
	1560		6.14286	0	3.85714	13.6429	1.07143	5.28571	4.07143	0	0.785714	4.85714	14.7857	0	8.14286
	1580		9.5	0	2.78571	14.4286	1.14286	5.28571	6.92857	0	0.785714	4.07143	12.6429	0	8.78571
	1600		7.5	0	3	15.2857	1.71429	5.21429	8.28571	0	1.42857	4.64286	11.2143	0	9.42857
	1620		5.21429	0	3.5	16.2857	0.857143	5.42857	5.92857	0	2.57143	4.14286	11.6429	0	9.78571
	1640		13.0714	0	2.42857	16.5	1	5.35714	5.5	0	4.28571	4.28571	11.6429	0	9.21429
	1660		14.2143	0	3.14286	16.0714	1.57143	5.71429	4.07143	0	4	3.78571	14.0714	0	8.85714
	1680		7.21429	0	3.85714	16.2143	1.92857	5.64286	5	0	4.64286	4.57143	10.7857	0	8.57143
	1700		7.07143	0	2.78571	16.2857	1.92857	5.57143	5.21429	0	4.21429	4.57143	13.1429	0	9.07143
	1720		8.92857	0	2.78571	15.0714	2.92857	5.78571	4.14286	0	3.64286	4.57143	9.64286	0	8.21429
	1740		13.3571	0	4.07143	15.4286	1.78571	6.14286	4.14286	0	2.85714	4.78571	7.42857	0	8.35714
Washout	1760		12.8571	0	4.21429	16.7143	2.28571	6.71429	5.42857	0	2.42857	4.85714	8.42857	0	8.57143
	1780		15.5	0	3.07143	16.8571	2.21429	6.78571	5.07143	0	1.78571	5.07143	9.64286	0	7.07143
	1800		12.6429	0	4.35714	16.9286	2.07143	6.92857	3.78571	0	2.35714	4.85714	12.8571	0	8.57143
	1820		15.9286	0	3.78571	17	1.5	7.07143	3.71429	0	2.57143	4.28571	10.4286	0	6.07143
	1840		15.8571	0	2.64286	16.7857	2.35714	7.21429	2.42857	0	1.21429	3.71429	3.14286	0	5
	1860		17.5	0	2.57143	16.4286	2.28571	7.21429	2.5	0	0.5	3.64286	4.64286	0	5.64286
	1880		15.7143	0	3.71429	17.0714	3.14286	7.64286	3.21429	0	0.928571	3.14286	5.42857	0	4.64286
	1900		14.4286	0	2.71429	16.0714	2.5	7.71429	2.78571	0	0.5	3.5	6.35714	0	3.71429
	1920		14.2857	0	4.28571	16.6429	2	8.57143	2.28571	0	4.5	3.14286	4.57143	0	3.14286
	1940		11.2857	0	3.57143	16.6429	2.42857	8.78571	2.57143	0	1.92857	3.21429	3.85714	0	2.78571
	1960		8.71429	0	2.85714	16.7857	2.21429	8.85714	2.14286	0	1.71429	3.21429	3.64286	0	2.57143
	1980		1.42857	0	3.35714	15.6429	1.42857	9.14286	0.642857	0	1.42857	3.28571	3.71429	0	2.85714
	2000		0.285714	0	3.57143	15.2857	2.07143	9.42857	1.21429	0	1.35714	3.07143	3	0	3.14286
	2020		0	0	3.28571	15	1	9.28571	2.78571	0	3	3.5	1.92857	0	2.5
	2040		0.5	0	2.71429	15.3571	2.28571	9.64286	2.5	0	3.64286	3.21429	5	0	2.35714
	2060		0.571429	0	4.21429	14.5	2.57143	9.92857	0.571429	0	2.28571	2.92857	3.64286	0	1.42857
	2080		0	0	4.71429	14.2857	2.5	9.78571	1.5	0	2.5	3.64286	1.92857	0	1.5
	2100		1.42857	0	4.28571	15	1.42857	10.2857	1.28571	0	3.64286	3.28571	1.07143	0	0.785714
	2120		0	0	4.14286	12.7143	3.57143	10.2143	1.28571	0	2.64286	3.64286	0.928571	0	2
	2140		0	0	3.5	13.7857	2.5	10.7857	3.35714	0	2.5	3.5	2.71429	0	1.92857
	2160		0	0	4.5	14	2	10.6429	2.07143	0	1.71429	3.07143	2.92857	0	2
	2180		0	0	4.07143	10.9286	2.92857	10.3571	1.92857	0	2.85714	3.5	2.21429	0	1.85714
	2200		0	0	3.35714	11.3571	2.07143	10.2143	3	0	2.28571	3.07143	3.64286	0	0.928571
	2220		0	0	3.07143	9.5	1.92857	10.0714	2.14286	0	1.57143	2.85714	3.85714	0	1
	2240		0	0	3.5	9.35714	2.42857	10.3571	4.57143	0	1	3.21429	5.85714	0	1.21429
	2260		0.5	0	4.57143	3.85714	2.64286	10.9286	2.71429	0	2.57143	3.5	5.07143	0	0.642857
	2280		0	0	2.71429	0.785714	3	10.9286	3.28571	0	2.85714	3.42857	5.64286	0	0.571429
	2300		0	0	3.64286	0.0714286	2.35714	11	3.92857	0	2.5	3.28571	7.35714	0	0.285714
	2320		0	0	3.28571	4.85714	2.85714	10.8571	4	0	2.21429	2.71429	5.85714	0	0.642857
	2340		0	0	2.07143	7.21429	2.64286	10.7143	4.21429	0	2.28571	3.5	4.07143	0	0.5
	2360		0.571429	0	3.57143	6.92857	2.28571	10.7857	5.42857	1.07143	4.28571	3	3.78571	0	0.642857
	2380		0	0	3.5	3.42857	3.57143	10.7143	5.28571	1.57143	4.14286	3.78571	1.42857	0	0.214286

## Sheet: Fig 2 S1B
		Membrane voltage
	Time (Seconds)
	20		-58.9867	-66.9537	-61.5035	-52.4363	-60.3713	-48.6614	-42.7048	-65.2102	-61.6958	-42.8743	-40.3132	-61.9443	-41.897
	40		-59.5295	-66.7809	-62.1811	-50.2319	-60.0231	-50.119	-44.7897	-64.3881	-61.8002	-43.5017	-44.7077	-62.5825	-46.6682
	60		-58.7518	-67.2008	-62.369	-50.6934	-59.9474	-50.3879	-41.9524	-63.822	-61.4941	-45.6715	-48.4491	-62.7731	-48.3128
	80		-58.7145	-66.786	-62.9143	-50.6571	-59.6569	-57.899	-42.8435	-63.6383	-61.3927	-45.1686	-50.2381	-62.8732	-47.8597
	100		-59.7815	-67.7708	-62.8488	-49.1684	-59.1002	-57.7041	-43.0457	-64.2099	-61.1562	-44.0865	-49.7733	-62.7428	-46.1675
	120		-55.4587	-68.3867	-62.6374	-49.7767	-59.2035	-56.0052	-44.3534	-64.4799	-60.0736	-43.5065	-51.0444	-63.103	-47.4462
	140		-57.2107	-68.8775	-62.8145	-49.7146	-58.8424	-53.9392	-44.8901	-64.1268	-61.0336	-43.2854	-53.3869	-63.365	-49.1258
	160		-57.736	-69.7321	-63.2912	-49.8372	-58.3409	-53.0864	-45.239	-64.0667	-60.8677	-43.7022	-54.7068	-63.8067	-50.4712
	180		-58.1595	-70.2879	-62.4042	-50.9407	-58.2905	-52.4487	-45.0319	-63.8289	-60.3486	-43.483	-60.4844	-63.8622	-48.868
	200		-58.6635	-70.7133	-62.3439	-50.191	-58.7266	-50.7576	-43.5335	-63.5762	-60.7481	-42.9982	-55.1266	-63.7051	-49.634
	220		-58.2704	-71.5764	-61.9399	-50.6826	-58.1202	-49.7694	-44.7798	-63.5904	-60.7398	-43.7891	-53.8085	-63.4789	-50.2802
	240		-57.4415	-71.8141	-61.7787	-52.0749	-58.6549	-49.1024	-44.5279	-63.2291	-61.0346	-44.6145	-52.3263	-63.1143	-50.4213
	260		-59.4626	-71.9613	-61.9609	-50.6098	-58.1019	-48.6489	-44.037	-63.1151	-60.8408	-44.3626	-62.2347	-63.8298	-50.9318
	280		-59.4963	-71.7602	-61.7478	-49.7379	-58.2473	-48.9749	-42.9318	-63.3593	-59.9833	-43.8554	-62.7687	-63.9723	-51.6604
	300		-59.9087	-72.4379	-61.9453	-49.4406	-58.248	-48.3573	-45.7853	-63.0542	-60.7168	-46.2934	-61.7284	-63.3269	-51.8548
	320		-60.9574	-72.2379	-61.384	-48.3873	-58.4511	-47.6699	-44.7673	-63.113	-60.0426	-47.473	-62.1219	-63.1246	-52.1775
	340		-61.8548	-72.0936	-61.6077	-47.1031	-58.254	-47.4625	-46.1183	-62.8093	-60.2946	-44.7878	-60.9702	-62.7706	-51.9426
	360		-62.3877	-73.4433	-61.8767	-48.2187	-57.4653	-47.0489	-46.7865	-62.8119	-60.1973	-46.2939	-58.0104	-62.8795	-51.3277
	380		-62.5088	-73.5632	-61.8369	-48.2291	-58.2867	-47.5321	-45.9277	-62.8189	-59.9575	-46.7691	-60.8413	-65.3046	-51.7582
	400		-62.1745	-73.4666	-61.4084	-48.7684	-58.6942	-47.2505	-46.2451	-62.6421	-59.2338	-44.7905	-62.3732	-66.432	-50.9558
	420		-63.0681	-73.6556	-61.608	-53.726	-57.997	-46.8376	-46.0128	-62.6295	-60.0046	-46.8407	-59.4974	-67.1013	-51.245
	440		-62.7372	-74.1667	-61.1872	-57.5322	-58.8501	-46.4513	-45.603	-62.9116	-60.2196	-45.9078	-58.9949	-67.0206	-53.916
	460		-62.9751	-74.4262	-61.7943	-57.5189	-58.1102	-45.9189	-46.5226	-62.558	-60.2702	-44.9657	-55.9178	-67.3971	-51.7754
	480		-62.825	-74.493	-61.3462	-57.8874	-58.5115	-45.4703	-46.4259	-62.406	-59.9962	-46.0493	-62.0946	-67.5225	-51.2882
	500		-64.6488	-74.5251	-61.2464	-57.6784	-57.9364	-44.9606	-48.0798	-61.8869	-60.1236	-46.2068	-60.1587	-66.798	-53.2683
	520		-64.5365	-74.918	-61.2839	-56.8082	-58.2041	-45.117	-46.9417	-62.0379	-59.7549	-45.4027	-60.1619	-67.8755	-52.2794
	540		-64.3443	-74.6164	-61.2284	-57.332	-57.9286	-45.37	-46.2376	-61.9855	-58.4858	-46.6194	-60.954	-67.556	-52.6885
	560		-65.1504	-75.5311	-60.9423	-55.4298	-57.2229	-45.3854	-46.9204	-61.8419	-60.0783	-45.6324	-59.7042	-67.701	-53.3495
	580		-64.8982	-75.0162	-60.6027	-54.4266	-58.852	-44.9922	-46.9768	-61.544	-60.2507	-46.4357	-59.837	-67.0544	-51.0307
	600		-65.2693	-74.4079	-60.4183	-54.0818	-58.9914	-45.324	-47.7921	-61.3906	-59.455	-45.144	-58.537	-67.8151	-52.7632
	620		-64.869	-75.3117	-60.7836	-54.2371	-59.0375	-44.574	-49.1557	-61.768	-59.6543	-44.152	-60.4163	-68.2696	-53.7545
	640		-64.8862	-75.7796	-60.8927	-51.7262	-58.6803	-45.5507	-48.6349	-61.5814	-59.3432	-44.6802	-61.6518	-68.1453	-53.6492
	660		-64.7873	-76.4274	-61.0743	-51.6015	-59.1418	-47.4001	-46.5642	-61.3501	-58.9632	-46.1541	-61.1537	-67.9914	-50.9997
	680		-65.6332	-76.317	-61.1217	-51.1342	-59.2744	-51.569	-49.2522	-61.195	-59.3989	-45.6738	-60.6438	-68.4665	-53.4431
	700		-65.2882	-75.0189	-61.0302	-50.0649	-59.5692	-53.9669	-47.7132	-61.2373	-57.9235	-44.6225	-60.5787	-68.3368	-54.4141
	720		-65.6506	-75.7182	-60.9398	-50.0963	-59.8954	-53.7267	-48.2193	-61.2127	-59.425	-44.9507	-62.5608	-68.2287	-56.4692
	740		-65.7116	-76.2293	-60.9032	-51.9652	-58.8874	-57.5889	-47.9627	-61.1332	-59.3491	-44.8949	-60.532	-68.0653	-55.6298
	760		-65.6352	-76.4338	-60.6964	-50.2473	-59.7163	-57.8956	-46.3586	-60.8734	-59.0021	-46.3892	-57.7737	-68.1203	-55.3382
	780		-63.9977	-76.3278	-61.0202	-49.9496	-60.554	-58.1662	-47.0331	-60.8106	-59.4387	-45.8218	-60.8923	-68.4185	-55.3299
	800		-65.8042	-76.5516	-61.3174	-49.6694	-59.3798	-53.7577	-47.974	-61.0506	-58.223	-46.9222	-54.7854	-68.7405	-58.174
	820		-66.85	-76.312	-61.3632	-48.8999	-58.3969	-53.3273	-47.3947	-60.7894	-59.8131	-48.0047	-51.7334	-69.0263	-55.378
	840		-66.9985	-76.7522	-61.6775	-50.482	-58.0644	-52.2814	-49.1663	-60.8517	-59.3603	-46.6807	-55.5314	-69.1979	-56.794
	860		-66.8577	-76.5685	-61.7783	-50.3567	-56.8339	-51.1319	-46.6562	-60.9593	-59.4944	-46.7798	-52.0382	-69.6146	-56.3624
	880		-66.9021	-76.5331	-61.7995	-50.8419	-56.3732	-50.2355	-46.0887	-61.2417	-59.585	-46.1386	-55.4245	-69.4313	-55.8742
	900		-66.8682	-76.6052	-61.7856	-50.9756	-56.3513	-49.5822	-45.9913	-61.0198	-59.3453	-47.4599	-57.4012	-70.1671	-56.8063
	920		-67.4871	-76.5636	-61.8171	-49.7786	-56.6717	-48.9193	-47.9006	-61.1253	-58.5563	-45.8744	-55.5585	-70.0296	-56.4203
	940		-66.9565	-76.7001	-61.7567	-51.9532	-57.9076	-48.4308	-46.4938	-60.9516	-58.8199	-47.285	-56.6006	-70.0524	-57.0804
	960		-66.4954	-76.3894	-61.5046	-53.4764	-56.8858	-48.169	-47.7963	-60.7427	-59.2147	-47.4931	-50.9961	-69.8564	-56.981
	980		-66.2717	-76.7191	-61.5654	-51.9381	-57.074	-48.0875	-46.802	-60.6612	-58.5593	-47.3741	-54.8563	-70.1686	-58.2618
	1000		-66.0708	-77.0031	-61.3842	-52.0002	-56.4737	-48.0814	-47.27	-60.5457	-58.4043	-47.6176	-51.1649	-70.264	-55.7003
	1020		-66.3235	-77.0863	-61.5006	-50.6919	-57.1626	-47.675	-46.0913	-60.9038	-58.3863	-46.3632	-53.2588	-70.4649	-57.2518
	1040		-66.1324	-76.8193	-61.006	-50.6114	-57.7624	-47.321	-45.5351	-60.6708	-58.9711	-47.6154	-54.5436	-71.121	-59.2949
	1060		-66.4154	-77.0919	-61.0731	-49.735	-57.9373	-47.2199	-46.5576	-60.6263	-59.1102	-47.5001	-51.9523	-70.857	-58.0723
	1080		-67.263	-77.2948	-60.6817	-49.84	-57.2592	-46.9646	-48.7253	-60.7762	-58.4483	-47.7073	-55.5157	-70.98	-59.1004
	1100		-67.1389	-77.5116	-60.858	-50.2267	-58.7152	-46.9784	-47.0418	-60.8531	-58.8185	-47.2609	-57.9246	-71.0391	-60.0984
	1120		-67.0397	-77.3446	-60.3577	-49.8455	-57.6909	-46.8457	-47.2319	-61.0809	-57.8118	-46.7863	-51.1934	-71.0182	-59.8205
	1140		-66.2165	-77.6052	-60.7713	-49.5166	-59.637	-46.4792	-47.672	-60.9469	-58.1542	-45.7245	-48.6552	-70.5735	-58.001
Drug Application	1160		-66.8226	-77.2473	-60.6657	-49.9043	-56.9864	-46.0333	-47.3586	-61.1153	-58.5618	-49.0272	-50.7208	-71.273	-60.057
	1180		-66.3557	-77.2762	-60.7591	-49.7777	-57.7046	-45.9914	-46.8502	-61.2722	-58.6426	-47.5075	-53.1315	-71.4095	-57.1121
	1200		-67.4007	-77.6623	-60.2051	-49.7822	-57.6607	-45.5433	-48.2782	-61.0263	-58.2747	-43.7982	-52.2289	-71.0232	-58.2351
	1220		-67.5083	-77.859	-61.0707	-49.3871	-57.4166	-44.8825	-49.6046	-60.8616	-57.2957	-46.4284	-51.2533	-71.7857	-59.5546
	1240		-66.7953	-77.9922	-60.574	-49.731	-58.8801	-45.2651	-46.5916	-60.8023	-58.9926	-46.5267	-50.911	-72.5704	-55.3574
	1260		-66.8317	-78.3353	-60.1209	-49.2872	-59.8048	-45.872	-46.8946	-61.357	-58.7458	-46.5391	-52.3001	-73.0705	-53.6663
	1280		-66.1148	-78.1037	-60.0256	-49.5305	-58.3973	-45.875	-43.127	-61.2266	-58.6904	-44.2871	-53.3417	-73.8743	-53.2183
	1300		-66.2623	-78.1667	-59.9366	-49.1867	-58.1078	-46.1072	-42.7512	-61.3787	-58.4291	-46.0493	-50.87	-73.9513	-54.151
	1320		-65.5585	-78.1774	-60.0716	-48.1711	-59.6413	-46.1815	-40.4666	-61.5364	-59.1949	-47.1521	-54.8464	-74.2436	-52.7287
	1340		-65.8566	-78.2662	-59.8789	-49.4562	-58.6565	-46.2555	-38.1598	-61.1509	-59.8744	-43.9303	-54.6645	-74.5303	-51.7726
	1360		-65.4756	-77.9323	-57.3516	-49.3594	-58.3533	-46.2352	-35.9844	-61.1899	-59.8714	-45.1455	-53.5445	-72.5478	-52.5519
	1380		-63.9725	-78.0078	-57.3839	-48.7228	-57.6624	-46.1308	-42.112	-61.0992	-59.5606	-44.3275	-56.3617	-72.6134	-51.7324
	1400		-64.5261	-78.1624	-53.1399	-48.2851	-60.1049	-46.4592	-48.0087	-60.8553	-59.2049	-41.8329	-52.3291	-72.3732	-51.4674
	1420		-61.9266	-78.2061	-54.8716	-48.3883	-59.2878	-46.5307	-45.6054	-60.8107	-59.0172	-43.7602	-51.1504	-72.3277	-50.7047
	1440		-62.0767	-77.4517	-53.6288	-47.4898	-59.3864	-46.6696	-48.4375	-60.9842	-58.0549	-44.0266	-53.1066	-72.1315	-50.8004
	1460		-61.6365	-77.6651	-52.662	-47.6418	-58.5655	-46.5227	-44.5554	-60.8692	-57.862	-44.2199	-53.4577	-73.1685	-51.056
	1480		-60.6885	-77.9154	-56.6784	-47.43	-58.2257	-46.1747	-48.3993	-60.6727	-56.8303	-43.8657	-49.7026	-72.653	-51.6307
	1500		-63.018	-77.9843	-52.5787	-47.0228	-57.3127	-46.3311	-50.5553	-60.7169	-55.6479	-44.659	-48.6696	-73.0004	-50.8385
	1520		-59.2848	-78.1326	-52.6756	-46.2155	-59.3909	-46.2609	-47.5687	-60.5138	-56.9814	-42.4717	-50.24	-73.6129	-51.0641
	1540		-55.1554	-78.113	-52.4887	-46.9185	-58.3177	-45.8182	-46.2098	-60.8938	-57.0777	-44.2452	-50.3525	-74.4928	-51.2381
	1560		-56.2942	-78.2388	-51.9808	-45.064	-59.5458	-46.1818	-50.5679	-60.5224	-55.0149	-42.8553	-48.7633	-74.744	-51.3336
	1580		-56.7254	-78.1635	-55.6187	-44.0989	-58.6157	-46.1349	-49.1023	-60.8108	-54.8445	-43.6463	-49.1462	-74.8814	-52.1073
	1600		-51.1074	-78.0583	-53.4634	-43.0592	-58.8875	-45.8254	-48.1135	-60.8481	-55.5794	-44.6275	-48.3257	-74.9097	-52.1168
	1620		-56.3723	-78.2162	-51.8459	-42.7504	-59.4478	-45.8187	-50.3459	-60.5482	-52.9674	-41.9109	-49.5863	-74.9794	-50.3103
	1640		-50.9446	-78.1619	-51.941	-42.3588	-57.9969	-45.1164	-50.1749	-60.3471	-51.3552	-43.3954	-49.8205	-75.6714	-51.8319
	1660		-48.0291	-78.2763	-52.1198	-41.7219	-59.4912	-44.9787	-50.6516	-60.5586	-52.7011	-44.5712	-48.3757	-75.45	-51.8111
	1680		-53.5811	-78.2986	-51.5972	-41.9386	-59.3231	-44.9029	-51.3092	-60.0331	-51.1839	-42.5095	-50.4462	-75.2514	-51.8739
	1700		-50.2686	-78.2359	-51.7913	-42.0566	-58.7233	-45.1778	-51.2152	-60.2336	-51.5482	-42.4925	-47.3619	-75.6228	-52.2383
	1720		-51.9436	-78.3322	-51.7462	-42.4042	-57.9025	-45.1403	-51.2694	-60.1035	-51.4918	-41.6505	-47.435	-75.5865	-51.8644
	1740		-49.6908	-78.1022	-51.3302	-43.6398	-59.5138	-44.8571	-51.1379	-59.7603	-53.2805	-41.6529	-50.9448	-75.5988	-51.8007
Washout	1760		-50.2105	-78.3717	-51.0198	-41.5597	-58.381	-44.9592	-50.7039	-59.9057	-52.6976	-42.9803	-51.0932	-75.4627	-52.0419
	1780		-45.849	-78.2798	-51.7628	-39.5302	-58.1526	-44.7532	-50.9841	-59.9341	-54.0474	-42.0233	-50.2483	-75.7702	-52.975
	1800		-47.4926	-78.3212	-51.2217	-40.4727	-58.1202	-45.1675	-50.9656	-59.355	-52.8322	-41.4611	-50.4231	-75.7976	-52.4458
	1820		-44.6453	-78.4099	-51.3115	-39.5713	-59.6895	-44.8719	-51.428	-59.8195	-52.7697	-41.6369	-48.1861	-75.0946	-54.3555
	1840		-45.0239	-78.2727	-51.734	-38.2813	-58.3398	-45.1093	-52.8402	-59.5054	-54.349	-43.5569	-53.8407	-74.1386	-54.5906
	1860		-43.9966	-78.3549	-52.3233	-38.1389	-58.504	-44.9115	-51.8309	-59.3391	-55.8734	-43.3589	-53.4334	-72.9859	-54.5912
	1880		-46.0757	-78.1243	-52.0347	-39.7049	-57.4701	-44.896	-51.755	-58.4579	-54.7537	-45.0369	-53.3576	-73.1251	-56.2965
	1900		-46.2503	-78.5547	-51.5098	-37.8488	-59.9685	-45.1211	-51.8979	-58.531	-55.3803	-45.2793	-51.328	-74.1843	-56.5264
	1920		-47.8562	-78.8316	-51.1953	-39.3799	-57.7773	-44.8361	-52.9305	-58.3652	-54.8806	-46.9736	-53.2841	-74.0028	-57.5491
	1940		-48.4531	-78.7014	-51.7975	-38.614	-58.8782	-44.7347	-52.9513	-58.3505	-53.408	-46.0266	-55.1164	-74.024	-57.5024
	1960		-48.7737	-78.441	-51.5793	-38.4258	-58.4646	-44.6319	-52.6936	-58.816	-53.8766	-45.9966	-54.6196	-74.4109	-57.699
	1980		-60.0073	-78.4095	-51.7108	-38.196	-60.1461	-44.6118	-53.8787	-58.435	-53.3499	-44.9884	-52.6873	-74.5333	-58.7506
	2000		-62.4081	-78.5512	-51.2302	-37.8285	-59.2272	-44.5452	-54.9883	-58.7856	-55.4332	-47.0466	-54.6148	-74.6731	-57.6479
	2020		-64.6666	-78.2425	-51.3623	-38.5723	-60.8539	-44.7086	-54.228	-57.9633	-52.7745	-46.0499	-57.1323	-74.265	-57.95
	2040		-64.0962	-78.3536	-51.8089	-37.8473	-60.0102	-44.5448	-50.4442	-58.481	-52.6964	-46.8888	-52.8733	-73.4439	-59.1926
	2060		-65.8576	-78.5893	-51.6327	-37.1037	-58.1182	-44.6563	-55.6684	-58.817	-53.4072	-46.7944	-55.2298	-73.9017	-59.8672
	2080		-66.1	-78.5146	-50.9419	-37.54	-58.5416	-44.9157	-54.9335	-59.0546	-52.9667	-45.9966	-58.1729	-74.4059	-60.3935
	2100		-62.8689	-78.2906	-51.1472	-37.4666	-59.2865	-44.8828	-54.8108	-58.7866	-52.331	-47.4946	-58.062	-74.7554	-61.7285
	2120		-65.8879	-78.2756	-51.1145	-36.2186	-57.0946	-44.8828	-55.2343	-58.2244	-52.4796	-46.6601	-56.3765	-74.3093	-59.5769
	2140		-66.6172	-78.0921	-53.0486	-37.2979	-59.351	-44.5122	-53.1038	-58.8395	-53.4386	-46.2226	-56.7939	-74.9956	-59.4718
	2160		-66.3448	-78.3517	-51.0521	-36.4918	-59.504	-44.5039	-52.8417	-58.7525	-53.7537	-46.6634	-54.8098	-74.5941	-59.108
	2180		-66.3451	-78.2047	-51.7148	-35.8192	-59.197	-44.8372	-54.0541	-58.4778	-52.483	-47.4822	-56.4126	-74.2062	-59.8532
	2200		-67.065	-78.3364	-54.6612	-35.7752	-59.0252	-44.7352	-52.8543	-58.8892	-53.1253	-48.8325	-55.991	-75.2239	-62.2602
	2220		-66.8936	-78.1579	-51.8862	-36.2577	-60.1188	-44.7148	-54.2656	-58.6053	-53.9372	-47.8703	-55.0723	-75.3754	-62.5678
	2240		-67.0204	-78.2169	-51.4083	-35.8496	-58.5797	-44.5399	-51.8621	-58.7794	-54.0906	-46.9312	-54.0975	-75.8621	-61.4922
	2260		-65.232	-78.1479	-51.2839	-36.0043	-58.7946	-44.7672	-53.1132	-59.3745	-53.4056	-47.6488	-53.4361	-76.093	-62.1211
	2280		-67.1106	-78.2426	-52.7353	-35.3129	-59.5814	-44.5353	-52.4602	-58.7141	-53.1765	-47.6594	-53.086	-75.6226	-62.1237
	2300		-67.4207	-78.0185	-52.4562	-34.4027	-58.5497	-44.2356	-52.142	-58.4295	-53.7332	-47.1385	-53.5146	-74.9467	-62.9047
	2320		-67.7369	-78.3959	-53.1313	-34.5895	-58.7536	-44.342	-52.8173	-58.5331	-53.5164	-48.7999	-53.2839	-75.2428	-63.469
	2340		-66.5668	-78.3618	-53.1748	-35.0707	-58.0707	-44.5207	-53.0913	-57.6528	-53.4035	-46.4394	-54.6874	-75.3115	-64.9477
	2360		-64.3962	-78.304	-51.2925	-34.1714	-60.2002	-44.5441	-51.817	-55.3223	-53.5229	-47.0428	-53.3004	-75.863	-64.3748
	2380		-64.5039	-78.1638	-51.9101	-33.0347	-56.9813	-44.8139	-52.0189	-53.907	-52.1069	-46.4458	-59.2335	-76.0632	-64.4096
			-64.5039	-78.1638	-51.9101	-33.0347	-56.9813	-44.8139	-52.0189	-53.907	-52.1069	-46.4458	-59.2335	-76.0632	-64.4096

## Sheet: Fig 2 S1C
Delta FR (Hz)
	Male	Female
	6.38485	1.25974
	0	1.3987
	2.24762	6.30498
	8.59719	0
	0.269913	-1.55844
	0	0.883333
	6.0368

## Sheet: Fig 2 S1D
Delta FR (Hz)
	Lobule
	IX	X
	2.24762	6.38485
	8.59719	0
	0.269913	-1.55844
	1.25974	0.883333
	0	0
		1.3987
		6.30498

## Sheet: Fig 2 S1E
	Mouse Age (days)	Delta FR (Hz)
	32	6.38485
	32	0
	21	2.24762
	21	8.59719
	21	0.269913
	23	-1.55844
	23	0.883333
	24	0
	25	1.25974
	25	1.3987
	32	6.30498
	32	0
	40	6.0368

## Sheet: Fig 2 S1F
SKF81297	Half width (ms)			ACSF	Half width (ms)			Antagonists	Half width (ms)
		Baseline	Drug			Baseline	Drug			Baseline	Drug
		1.22163	2.42326			2.22976	2.20754			1.87827	2.41463
		1.45496	1.56213			2.51896	1.63577			1.13437	1.05078
		1.56759	2.44148			1.406	1.43499			1.56482	1.82187
		1.14932	1.17248			1.01842	0.783731			7.32942	3.31395
		1.6914	1.87228			1.27746	1.28188			2.29457	2.78143
		1.44095	1.6204			1.83824	1.817			1.38346	1.34672
		1.29377	1.35942			1.82244	1.8206			1.34004	1.51501
		1.38031	2.04154			1.37671	1.39145			1.23987	1.26709
		1.19608	1.52353							1.18337	1.66807
		1.16379	2.1755

## Sheet: Fig 2 S1G
Peak Amplitude pA
	Baseline	Cpp
	63.2884	16.9065
	47.3734	11.8618
	60.9743	4.1728
	51.4685	10.6248
	35.8754	12.4856
