# Supplementary material for: Dopaminergic regulation of vestibulo-cerebellar circuits through unipolar brush cells
Source: eLife journal article supplement (doi:10.7554/elife.76912), 2022-04-27
Supplement: supp [file elife-76912-supp-v1.zip › elife_poa_e76912_Figure_2_source_data_1.xlsx]

## Sheet: SKF81297
FR				Rin				Vm
	Baseline	Drug	Delta FR		Baseline	Drug	Delta Rin		Baseline	Drug	Delta VM
	0	6.38809	6.38809		727.346	1491.52	764.173		-66.7805	-56.8854	9.89502
	0	0	0		389.338	348.258	-41.0795		-77.0426	-78.1453	-1.10271
	0	2.24762	2.24762		1480.11	2250.84	770.722		-61.1798	-54.1326	7.0472
	4.12662	12.7238	8.59719		1912.86	1904.38	-8.479		-50.4433	-45.0538	5.3895
	1.38961	1.65952	0.269914		1339.96	1435.11	95.15		-57.5384	-58.7782	-1.23976
	7.4513	5.89286	-1.55844		1109.48	1038.48	-70.992		-47.9748	-45.7473	2.2275
	8.60714	9.49048	0.883335		977.324	1452.62	475.292		-47.2317	-47.6548	-0.4231
	0	0	0		1405.08	1597.71	192.627		-60.9011	-60.5847	0.3164
	0.0616883	1.32143	1.25974		1164.76	1474.68	309.919		-58.7555	-55.7235	3.03195
	3.12987	4.52857	1.3987		1150.02	1270.92	120.897		-46.9524	-43.5827	3.36968
	1.74026	8.04524	6.30498		1462.29	1610.22	147.927		-53.2997	-50.9645	2.33524
	0	0	0		1046.69	1136.42	89.725		-70.542	-74.2517	-3.70971
	2.73701	8.77381	6.0368		1667.97	2125.24	457.273		-57.6188	-52.0773	5.54155

## Sheet: Antagonists
FR				Rin				Vm
	Baseline	Drug	Delta FR		Baseline	Drug	Delta Rin		Baseline	Drug	Delta VM
	14.1656	11.3143	-2.85129		1361.78	1387.3	25.517		-51.4563	-48.9398	2.51645
	0	0	0		761.807	712.621	-49.1856		-71.9655	-74.7077	-2.74212
	0.214286	0.0261905	-0.188095		943.236	975.623	32.3869		-66.0715	-66.0093	0.0622
	0	0	0		748.601	849.298	100.697		-66.3431	-66.6569	-0.31379
	0.116883	0	-0.116883		896.884	888.78	-8.1038		-60.503	-60.7396	-0.23662
	0.574675	0.0190476	-0.555628		711.991	594.066	-117.925		-71.9547	-76.1081	-4.15346
	0	0	0		1390.12	1438.42	48.305		-62.4825	-63.3119	-0.82934
	0	0	0		623.207	615.228	-7.9789		-65.7097	-65.9451	-0.23539
	6.97727	2.73333	-4.24394		806.874	977.57	170.696		-54.8138	-56.2241	-1.4103
	0	0.0285714	0.0285714		880.158	1091.58	211.419		-63.8357	-62.6882	1.14755
	3.56818	4.75	1.18182		1393.84	1291.57	-102.267		-52.3308	-51.7792	0.5516
	0.00974026	0.0309524	0.0212121		2280.99	2457.41	176.415		-69.3651	-69.4631	-0.09803
	0.0422078	0	-0.0422078		1280.33	1311.31	30.976		-56.0302	-56.1696	-0.13933
	4.99675	10.9809	5.9842		1483.11	1782.57	299.46		-58.1933	-54.9653	3.22802

## Sheet: ACSF
FR				Rin				Vm
	Baseline	Drug	Delta FR		Baseline	Drug	Delta Rin		Baseline	Drug	Delta VM
	0	0.0142857	0.0142857		1122.47	1301.39	178.921		-58.5026	-59.1933	-0.69063
	13.6526	10.8976	-2.75498		932.947	862.028	-70.9186		-45.1316	-46.1774	-1.04579
	0	0	0		556.983	378.781	-178.202		-74.5388	-77.6513	-3.11247
	0.0909091	0	-0.0909091		903.362	907.865	4.5028		-63.1964	-65.9819	-2.78559
	0	0.647619	0.647619		668.171	836.963	168.792		-72.1122	-71.5395	0.5727
	0	0	0		1159.13	1203.48	44.35		-67.4606	-66.7905	0.67014
	10.9091	10.6929	-0.21623		615.179	643.757	28.5777		-50.1853	-51.3924	-1.20702
	0	0	0		840.479	771.044	-69.4348		-59.3052	-61.5663	-2.26104
	0.266234	0	-0.266234		852.189	661.741	-190.448		-66.6416	-69.9076	-3.266
	0.532467	0.314286	-0.218182		1188.88	1161.51	-27.373		-52.2957	-53.3616	-1.06588
	14.6331	14.8786	0.24545		1453.33	1488.99	35.665		-46.5246	-46.881	-0.35633
	13.2825	13.1048	-0.17771		1525.52	1543.55	18.035		-48.084	-47.9893	0.09469
	5.30844	5.06667	-0.241775		1108.88	1056.09	-52.79		-49.8263	-49.9139	-0.08763

## Sheet: Fig 2 C-D
FR
	Baseline	Drug
	0	6.38809
	0	0
	0	2.24762
	4.12662	12.7238
	1.38961	1.65952
	7.4513	5.89286
	8.60714	9.49048
	0	0
	0.0616883	1.32143
	3.12987	4.52857
	1.74026	8.04524
	0	0
	2.73701	8.77381

## Sheet: Fig 2 E-F
SKF81297				Antagonist				ACSF
	Delta FR	Delta VM	Delta Rin		Delta FR	Delta VM	Delta Rin		Delta FR	Delta VM	Delta Rin
	6.38809	9.89502	764.173		-2.85129	2.51645	25.517		0.0142857	178.921	-0.69063
	0	-1.10271	-41.0795		0	-2.74212	-49.1856		-2.75498	-70.9186	-1.04579
	2.24762	7.0472	770.722		-0.188095	0.0622	32.3869		0	-178.202	-3.11247
	8.59719	5.3895	-8.479		0	-0.31379	100.697		-0.0909091	4.5028	-2.78559
	0.269914	-1.23976	95.15		-0.116883	-0.23662	-8.1038		0.647619	168.792	0.5727
	-1.55844	2.2275	-70.992		-0.555628	-4.15346	-117.925		0	44.35	0.67014
	0.883335	-0.4231	475.292		0	-0.82934	48.305		-0.21623	28.5777	-1.20702
	0	0.3164	192.627		0	-0.23539	-7.9789		0	-69.4348	-2.26104
	1.25974	3.03195	309.919		-4.24394	-1.4103	170.696		-0.266234	-190.448	-3.266
	1.3987	3.36968	120.897		0.0285714	1.14755	211.419		-0.218182	-27.373	-1.06588
	6.30498	2.33524	147.927		1.18182	0.5516	-102.267		0.24545	35.665	-0.35633
	0	-3.70971	89.725		0.0212121	-0.09803	176.415		-0.17771	18.035	0.09469
	6.0368	5.54155	457.273		-0.0422078	-0.13933	30.976		-0.241775	-52.79	-0.08763
					5.9842	3.22802	299.46

## Sheet: Fig 2 K
NMDA currents EPSC amplitude
	Baseline	Drug
	50.3425	70.3089
	35.831	53.1895
	76.5181	94.2576
	71.2817	66.5438
	29.9722	37.4421
	28.3236	32.2446
	37.3728	41.0071
	61.2559	63.5679
	82.9454	85.7141

## Sheet: Fig 2 N
NMDA currents EPSC amplitude
	ACSF group	Drug Group
	6.55748	10.9301
	8.96462	20.7462
	5.48738	9.29107
	7.99811	4.92069
	5.88209	7.13885
	4.20514	11.8996
	7.13885	8.20084
	11.8996	12.6456
	8.20084	12.2127
	4.21213	10.6035
	5.20693	14.2137
	11.9795	11.2113
	5.49767	7.41706
	7.20527
