# Supplementary material for: Dopaminergic regulation of vestibulo-cerebellar circuits through unipolar brush cells
Source: eLife journal article supplement (doi:10.7554/elife.76912), 2022-04-27
Supplement: supp [file elife-76912-supp-v1.zip › elife_poa_e76912_Figure_3_figure_supplement_1_source_data_1.xlsx]

## Sheet: Fig 3_S1 C
	LRN TH	LRN VMAT2
Proportion of cells expressing transcripts	0.14	0.01

## Sheet: Fig 3_S1 D
Puncta per cell (independent across row)	TH puncta per LRN neuron	VMAT2 puncta per LRN neuron	TH Puncta per TH+ SNc neuron	VMAT2 Puncta per TH+ SNc neuron
Cells with zero puncta were not used to calculate avg puncta/cell	35	10	64	9
	1	0	17	36
	0	0	79	1
	0	0	25	2
	1	0	21	99
	0	0	16	37
	0	0	28	36
	0	0	18	52
	1	0	55	7
	1	0	45	22
	0	0	80	31
	0	0	43	8
	0	0	57	10
	0	0	56	9
	0	0	16	21
	0	0	38	35
	0	0	32	28
	0	0	79	28
	0	0	57	31
	0	0	13	17
	0	0	60	9
	0	0	41	36
	0	0	32	16
	0	0	29	36
	2	0	8	25
	1	0	15	41
	0	0	23	35
	1	0	93	5
	0	0	34	21
	0	0	15	37
	0	0	36	11
	0	0	42	11
	0	0	75	16
	0	0	15	33
	0	0	37	26
	0	0	76	13
	0	0	217	11
	0	0	27	5
	0	0	196	11
	0	0	63	56
	0	0	105	6
	0	0	33	21
	0	0	59	10
	0	0	98	11
	0	0	72	42
	0	0	181	14
	0	0	24	6
	0	0	19	41
	0	0	51	68
	0	0	52	16
	1	0	65	36
	0	0	11	20
	0	0	11	94
	1	0	26	33
	0	0	73	40
	0	0	9	19
	2	0	44	33
	0	0	17	48
	0	0	110	47
	0	0	14	16
	3	0	27	22
	3	0	106	26
	2	0	238	39
	1	0	12	27
	2	0	33	17
	0	0	14	31
	0	0	25	1
	0	0	21	36
	0	0	26	6
	0	0	10	59
	0	0	10	12
	0	0	53	4
	0	0	39	56
	0	0	36	13
	0	0	43	20
	51	0	34	4
	0	0	95	14
	10	1	97	8
	1	0	14	2
	0	0	32	7
	0	0	79	15
	2	0	22	15
	0	0	34	0
	0	0	80	30
	2	0	15	1
	1	0	50	1
	16	0	109	0
	2	0	29	4
	0	0	14	7
	0	0	15	16
	0	0	10	1
	0	0	95	34
	0	0	51	2
	1	0	21	18
	0	0	12	1
	0	1	29	7
	2	0	25	8
	0	0	44	23
	0	0	15	17
	0	0	131	5
	1	0	50	8
	0	0	29	0
	0	0	19	10
	2	0	16	2
	0	0	28	2
	0	0	11	19
	0	0	72	10
	1	0	31	13
	0	0	38	6
	0	0	19	12
	2	0	20
	0	0	13
	0	0	25
	0	0	91
	5	0	21
	0	0	34
	0	0	32
	0	0	10
	1	0	10
	0	0	12
	0	0	64
	0	0	43
	0	0	45
	0	0	56
	0	0	14
	0	0	10
	0	0	45
	0	0	45
	0	0	17
	0	0	12
	0	0	23
	1	0	26
	0	0	33
	0	0	35
	1	0	16
	0	0	28
	0	0	13
	0	0	28
	1	0	38
	0	0	44
	0	0	13
	0	0	12
	0	0	98
	0	0	90
	0	0	27
	0	0	81
	0	0	74
	0	0	46
	0	0	69
	0	0	14
	0	0	23
	4	0	70
	0	0	50
	0	0	55
	0	0	11
	1	0	30
	0	0	70
	0	0	105
	0	0	53
	0	0	28
	0	0	50
	0	0	41
	1	0	60
	0	0	74
	0	0	13
	0	0	13
	1	0	16
	0	0	15
	0	0	37
	0	0	21
	0	0	40
	0	0	81
	0	0	50
	1	0	50
	0	0	59
	0	0	9
	0	0	53
	0	0	31
	0	0	77
	0	0	13
	0	0	32
	0	0	87
	0	0	10
	0	0	44
	0	0	38
	1	0	9
	1	0	14
	0	0	95
	0	0	12
	0	0	23
	0	0	18
	0	0	17
	1	0	21
	0	0	11
	0	0	67
	0	0	64
	0	0	37
	2	0	18
	2	0	17
	0	0	29
	0	0	0
	0	0	0
	0	0	4
	0	0	58
	1	0	7
	1	0	17
	1	0	1
	0	0	11
	0	0	22
	1	0	5
	1	0	18
	0	0	11
	0	0	1
	1	0	56
	0	0	21
	0	0	14
	0	0	8
	1	0	5
	1	0	7
	0	0	18
	0	0	10
	0	0	19
	0	0	25
	0	0	0
	0	0	13
	0	0	4
	0	0	10
	0	0	12
	0	0	16
	0	0	4
	0	0	16
	1	0	0
	0	0	6
	0	0	3
	0	0	7
	0	0	2
	0	0	16
	0	0	7
	0	0	6
	0	0	17
	0	0	21
	0	0	22
	0	0	13
	0	0	12
	0	0	10
	0	0	25
	0	0	29
	0	0	8
	0	0	7
	0	0	13
	0	0	30
	0	0	37
	1	0	31
	0	0	9
	0	0	26
	0	0	8
	0	0	24
	0	0	14
	0	0	15
	0	0	17
	0	0	23
	0	0	10
	0	0	9
	19	13	0
	0	0	15
	0	0	1
	2	0	5
	0	0	4
	0	0	4
	0	0	8
	0	0	16
	0	0	14
	1	0	20
	7	0	24
	0	0	21
	0	0	3
	0	0	4
	0	0	3
	4	0	6
	0	0	15
	0	0	6
	0	0	7
	0	0	30
	0	0	11
	0	0	1
	2	0	8
	0	0	5
	0	0	3
	0	0	8
	0	0	4
	1	0	5
	0	0	6
	0	0	7
	0	0	11
	0	0	2
	0	0	17
	0	0	6
	0	0	6
	0	0	8
	0	0	1
	0	0	2
	0	0	9
	0	0	7
	3	0	19
	0	0	1
	0	0	7
	1	0	11
	1	0
	2	0
	0	0
	0	0
	0	0
	0	0
	0	0
	0	0
	0	0
	1	0
	0	0
	0	0
	0	0
	0	0
	0	0
	0	0
	1	0
	0	0
	0	0
	0	0
	0	0
	0	0
	1	0
	0	0
	0	0
	0	0
	2	0
	0	0
	0	0
	1	0
	0	0
	0	0
	0	0
	1	0
	0	0
	0	0
	0	0
	0	0
	1	0
	0	0
	0	0
	0	0
	0	0
	0	0
	0	0
	0	0
	0	0
	0	0
	0	0
	0	0
	0	0
	0	0
	0	0
	0	0
	0	0
	0	0
	0	0
	0	0
	0	0
	0	0
	0	0
	0	0
	0	0
	0	0
	0	0
	0	0
	0	0
	0	0
	0	0
	0	0
	0	0
	0	0
	0	0
	0	0
	0	0
	0	0
	0	0
	0	0
	0	0
	0	0
	0	0
	1	0
	0	0
	0	0
	0	0
	0	0
	0	0
	1	0
	1	0
	0	0
	0	0
	1	0
	0	0
	0	0
	0	0
	0	0
	0	0
	0	0
	0	0
	0	0
	0	0
	0	0
	0	0
	0	0
	0	0
	0	0
	0	0
	2	0
	0	0
	0	0
	0	0
	0	0
	0	0
	0	0
	0	0
	0	0
	1	0
	0	0
	1	0
	0	0
	0	0
	2	0
	1	0
	0	0
	0	0
	0	0
	0	0
	0	0
	0	0
	0	0
	1	0
	0	0
	0	0
	1	0
	0	0
	0	0
	0	0
	0	0
	0	0
	0	0
	0	0
	0	0
	0	0
	0	0
	0	0
	1	0
	0	0
	0	0
	0	0
	0	0
	0	0
	0	0
	1	0
	2	0
	13	13
	0	0
	0	0
	0	0
	0	0
	0	0
	1	0
	0	0
	1	0
	0	0
	0	0
	0	0
	0	0
	0	0
	0	0
	4	2
	1	0
	2	0
	0	0
	0	0
	0	0
	0	0
	0	0
	1	0
	1	0
	0	0
	0	0
	0	0
	0	2
	1	0
	2	0
	0	1
	0	0
	0	0
	1	1
	0	0
	1	0
	0	0
	2	0
	0	0
	0	0
	0	0
	0	0
	0	0
	0	0
	0	0
	0	0
	0	0
	1	0
	0	0
	0	0
	1	1
	2	0
	0	0
	1	0
	1	0
	0	0
	0	0
	0	0
	0	0
	0	0
	0	0
	0	0
	0	0
	0	0
	0	0
	0	0
	0	0
	2	0
	0	0
	0	0
	0	2
	0	0
	0	0
	0	0
	1	0
	0	0
	0	0
	0	0
	1	0
	0	0
	0	0
	0	0
	1	0
	0	0
	0	0
	1	2
	0	0
	2	0
	1	0
	1	0
	0	0
	0	0
	0	0
	0	0
	0	0
	0	0
	1	0
	0	0
	0	0
	0	0
	0	0
	0	0
	0	0
	0	0
	0	0
	0	0
	0	0
	0	0
	0	0
	0	0
	0	0
	0	0
	0	0
	0	0
	1	0
	1	0
	1	0
	0	0
	0	0
	0	0
	1	0
	1	0
	1	0
	0	0
	0	0
	0	0
	1	0
	0	0
	0	0
	2	0
	1	0
	0	0
	0	0
	0	0
	0	0
	0	0
	0	0
	2	0
	0	0
	0	0
	0	0
	0	0
	0	0
	0	0
	0	0
	0	0
	0	0
	0	0
	0	0
	0	0
	0	0
	0	0
	0	0
	0	0
	0	0
	0	0
	0	0
	4	0
	0	0
	0	0
	0	0
	0	0
	0	0
	0	0
	0	0
	0	0
	0	0
	0	0
	2	0
	23	20
	0	0
	0	0
	2	0
	0	0
	0	0
	0	0
	0	0
	0	0
	0	0
	0	0
	11	10
	0	0
	0	0
	0	0
	0	0
	0	0
	0	2
	0	0
	0	0
	0	0
	0	0
	2	3
	0	0
	0	1
	0	1
	0	0
	0	1
	1	0
	0	0
	0	0
	1	0
	0	0
	0	0
	0	0
	0	0
	0	0
	1	0
	1	0
	0	0
	2	0
	3	0
	0	0
	0	0
	0	0
	0	0
	1	0
	1	0
	0	0
	0	0
	0	0
	0	0
	0	0
	1	0
	0	0
	0	0
	0	0
	0	0
	0	0
	0	0
	0	0
	0	0
	0	0
	1	0
	2	0
	0	0
	0	0
	0	0
	0	0
	0	0
	0	0
	0	0
	0	0
	0	0
	0	0
	0	0
	0	0
	0	0
	1	0
	0	0
	0	0
	0	0
	2	0
	0	0
	0	0
	0	0
	3	0
	0	0
	0	0
	1	0
	0	0
	0	0
	0	0
	0	0
	1	0
	0	0
	0	0
	0	0
	0	0
	0	0
	0	0
	0	0
	0	0
	0	0
	1	0
	0	0
	0	0
	0	0
	1	0
	0	0
	0	0
	0	0
	0	0
	0	0
	0	0
	0	0
	1	0
	0	0
	0	0
	1	0
	0	0
	0	0
	0	0
	0	0
	0	0
	0	0
	0	0
	0	0
	42	4
	1	0
	0	0
	0	0
	0	0
	0	0
	0	0
	0	0
	0	0
	0	0
	0	0
	0	0
	1	0
	1	0
	0	0
	0	0
	0	0
	0	0
	0	0
	0	0
	0	0
	1	0
	0	0
	0	0
	0	0
	0	0
	0	0
	0	0
	0	0
	0	0
	0	0
	0	0
	0	0
	0	0
	0	0
	0	0
	0	0
	0	0
	0	0
	0	0
	0	0
	0	0
	1	0
	0	0
	0	0
	0	0
	0	0
	0	0
	0	0
	0	0
	0	0
	0	0
	0	0
	0	0
	0	0
	0	0
	0	0
	2	0
	1	0
	0	0
	0	0
	0	0
	0	0
	0	0
	0	0
	1	0
	0	0
	0	0
	2	1
	1	0
	0	0
	0	0
	0	0
	0	0
	0	0
	0	0
	0	0
	0	0
	1	0
	1	0
	0	0
	0	0
	0	0
	0	0
	0	0
	0	0
	0	0
	1	0
	0	0
	0	0
	0	0
	0	0
	0	0
	1	0
	0	0
	0	0
	0	0
	0	0
	0	0
	0	0
	1	0
	0	0
	1	0
	1	0
	1	0
	0	0
	1	0
	0	0
	0	0
	1	0
	0	0
	0	0
	0	0
	1	0
	0	0
	0	0
	0	0
	0	0
	0	0
	0	0
	3	0
	1	0
	0	0
	0	0
	0	0
	0	0
	0	0
	0	0
	13	2
	0	0
	0	0
	0	0
	0	0
	0	0
	0	0
	0	0
	0	0
	0	0
	0	0
	0	0
	0	0
	0	0
	0	0
	0	0
	0	0
	0	0
	0	0
	0	0
	0	0
	0	0
	0	0
	0	0
	0	0
	0	0
	0	0
	0	0
	1	0
	0	0
	0	0
	0	0
	0	0
	0	0
	0	0
	0	0
	0	0
	0	0
	0	0
	0	0
	0	0
	0	0
	0	0
	0	0
	0	0
	0	0
	0	0
	0	0
	0	0
	0	0
	0	0
	0	0
	0	0
	0	0
	0	0
	0	0
	0	0
	0	0
	0	0
	0	0
	0	0
	0	0
	0	0
	0	0
	0	0
	0	0
	0	0
	0	0
	0	0
	0	0
	0	0
	0	0
	0	0
	0	0
	0	0
	0	0
	0	0
	0	0
	0	0
	0	0
	0	0
	0	0
	0	0
	0	0
	0	0
	0	0
	0	0
	0	0
	0	0
	0	0
	0	0
	0	0
	0	0
	0	0
	0	0
	0	0
	0	0
	0	0
	0	0
	0	0
	0	0
	0	0
	0	0
	0	0
	0	0
	0	0
	0	0
	0	0
	0	0
	0	0
	0	0
	0	0
	0	0
	0	0
	0	0
	0	0
	0	0
	0	0
	0	0
	0	0
	0	0
	0	0
	0	0
	0	0
	1	0
	0	0
	0	0
	0	0
	0	0
	0	0
	0	0
	0	0
	1	0
	0	0
	0	0
	0	0
	1	0
	0	0
	0	0
	0	0
	0	0
	0	0
	0	0
	0	0
	1	0
	0	0
	0	0
	0	0
	0	0
	1	0
	0	0
	0	0
	0	0
	0	0
	4	0
	0	0
	0	0
	0	0
	0	0
	0	0
	1	0
	1	0
	0	0
	0	0
	0	0
	0	0
	0	0
	0	0
	0	0
	0	0
	0	0
	0	0
	2	0
	0	0
	0	0
	0	0
	0	0
	0	0
	0	0
	0	0
	0	0
	0	0
	0	0
	0	0
	0	0
	0	0
	3	0
	1	0
	0	0
	0	0
	0	0
	0	0
	1	0
	1	0
	0	0
	0	0
	0	0
	0	0
	0	0
	0	0
	0	0
	0	0
	0	0
	1	0
	0	0
	1	0
	0	0
	0	0
	0	0
	0	0
	0	0
	0	0
	0	0
	0	0
	0	0
	0	0
	0	0
	0	0
	0	0
	0	0
	0	0
	0	0
	1	0
	0	0
	0	0
	1	0
	1	0
	0	0
	0	0
	0	0
	0	0
	0	0
	0	0
	0	0
	0	0
	0	0
	0	0
	0	0
	2	0
	2	0
	0	0
	0	0
	0	0
	0	0
	0	0
	0	0
	0	0
	0	0
	0	0
	0	0
	0	0
	0	0
	0	0
	0	0
	0	0
	1	0
	0	0
	0	0
	0	0
	0	0
	0	0
	0	0
	2	0
	0	0
	0	0
	0	0
	0	0
	0	0
	1	0
	1	0
	0	0
	0	0
	0	0
	0	0
	0	0
	0	0
	0	0
	3	0
	0	0
	0	0
	0	0
	0	0
	0	0
	0	0
	0	0
	0	0
	0	0
	0	0
	0	0
	0	0
	0	0
	0	0
	0	0
	0	0
	0	0
	0	0
	0	0
	0	0
	0	0
	0	0
	0	0
	0	0
	0	0
	0	0
	0	0
	0	0
	0	0
	0	0
	0	0
	0	0
	0	0
	0	0
	0	0
	0	0
	0	0
	0	0
	0	0
	0	0
	0	0
	0	0
	0	0
	0	0
	0	0
	0	0
	0	0
	0	0
	0	0
	0	0
	0	0
	0	0
	0	0
	0	0
	0	0
	0	0
	0	0
	0	0
	0	0
	0	0
	0	0
	0	0
	0	0
	0	0
	0	0
	0	0
	0	0
	1	0
	0	0
	0	0
	0	0
	0	0
	0	0
	0	0
	0	0
	0	0
	0	0
	0	0
	0	0
	0	0
	0	0
	0	0
	0	0
	0	0
	0	0
	0	0
	0	0
	0	0
	0	0
	0	0
	0	0
	0	0
	0	0
	0	0
	0	0
	0	0
	0	0
	0	0
	0	0
	0	0
	0	0
	1	0
	0	0
	0	0
	0	0
	0	0
	0	0
	0	0
	0	0
	0	0
	0	0
	0	0
	0	0
	0	0
	0	0
	0	0
	0	0
	0	0
	0	0
	0	0
	0	0
	0	0
	0	0
	0	0
	0	0
	0	0
	0	0
	0	0
	0	0
	0	0
	0	0
	0	0
	0	0
	0	0
	0	0
	0	0
	0	0
	0	0
	0	0
	0	0
	0	0
	0	0
	0	0
	0	0
	0	0
	0	0
	0	0
	0	0
	0	0
	0	0
	29	24
	0	0
	0	0
	0	0
	0	0
	0	0
	0	0
	0	0
	0	0
	0	0
	0	0
	0	0
	0	0
	0	0
	0	0
	0	0
	0	0
	0	0
	0	0
	0	0
	0	6
	0	0
	0	0
	0	0
	0	0
	0	0
	0	0
	0	0
	0	0
	0	0
	0	0
	0	0
	0	0
	0	0
	0	0
	0	0
	0	0
	0	0
	0	0
	0	0
	0	0
	0	0
	0	0
	0	0
