# Supplementary material for: Dopaminergic regulation of vestibulo-cerebellar circuits through unipolar brush cells
Source: eLife journal article supplement (doi:10.7554/elife.76912), 2022-04-27
Supplement: supp [file elife-76912-supp-v1.zip › elife_poa_e76912_Figure_3_source_data_1.xlsx]

## Sheet: Fig 3  F Top
	SNc VMAT2	Pkj VMAT2	SNc DAT	Pkj DAT	SNc DDC	Pkj DDC	SNc TH	PKJ TH
Proportion of cells expressing transcripts	0.93	0.11	0.86	0.11	0.89	0.05	0.94	0.9

## Sheet: Fig 3 F Bottom
Puncta per cell (independent across row)	VMAT2 Puncta per TH+ SNc neuron	VMAT2 Puncta per TH+Pkj cell	DAT Puncta per TH+ SNc neuron	DAT Puncta per TH+Pkj cell	DDC Puncta per TH+ SNc neuron	DDC Puncta per TH+Pkj cell	TH Puncta per TH+ SNc neuron	TH Puncta per TH+Pkj cell
Cells with zero puncta were not used to calculate avg puncta per cell	9	0	0	0	0	0	64	15
	36	0	0	0	39	0	17	8
	1	0	4	0	4	1	79	4
	2	0	0	0	47	0	25	10
	99	0	57	0	44	0	21	8
	37	0	7	2	31	1	16	8
	36	2	17	0	34	0	28	36
	52	0	1	0	90	0	18	6
	7	0	11	0	72	0	55	34
	22	0	5	0	110	0	45	5
	31	0	31	2	13	0	80	18
	8	0	0	0	77	0	43	8
	10	0	1	0	24	0	57	42
	9	0	0	0	0	0	56	5
	21	0	18	0	38	0	16	9
	35	0	58	0	39	0	38	9
	28	0	21	0	15	0	32	25
	28	0	14	0	29	0	79	11
	31	3	8	1	73	0	57	25
	17	0	7	0	42	0	13	26
	9	0	7	0	61	0	60	1
	36	0	18	0	12	0	41	7
	16	0	9	0	37	0	32	51
	36	0	10	0	41	0	29	5
	25	0	19	0	77	0	8	56
	41	1	25	0	61	0	15	0
	35	1	13	0	48	0	23	12
	5	0	4	0	23	0	93	34
	21	0	12	0	3	0	34	18
	37	0	16	0	10	0	15	58
	11	0	4	1	46	0	36	7
	11	0	0	0	18	0	42	21
	16	0	5	0	27	0	75	49
	33	0	10	0	35	0	15	18
	26	0	6	0	23	0	37	9
	13	0	3	0	1	0	76	100
	11	0	1	0	45	0	217	58
	5		5		24	0	27	37
	11		2		13	0	196	63
	56		13		10	0	63	12
	6		0		27	0	105	8
	21		16		24	0	33	0
	10		9		11	0	59	12
	11		8		3	0	98
	42		17		25	0	72
	14		13		91	0	181
	6		0		37	0	24
	41		19		30	0	19
	68		39		47	0	51
	16		13		60	0	52
	36		8		9	0	65
	20		7		18	0	11
	94		43		4	0	11
	33		30		4	0	26
	40		37		5	0	73
	19		10		28	0	9
	33		32		17	0	44
	48		12		4	0	17
	47		27		59	0	110
	16		24		7	0	14
	22		16		22	0	27
	26		12		2	0	106
	39		17		24	0	238
	27		20		59	0	12
	17		7		14	0	33
	31		10		106	0	14
	1		0		86	0	25
	36		9		28	0	21
	6		0		61	0	26
	59		15		64	0	10
	12		11		28	0	10
	4		4		37	0	53
	56		16		84	0	39
	13		13		16	1	36
	20		20		0	0	43
	4		24		19	0	34
	14		30		25	0	95
	8		3		27	0	97
	2		4		11	0	14
	7		6		13	0	32
	15		15		22	0	79
	15		6		67	0	22
	0		7		19	0	34
	30		33		34	3	80
	1		11		34	0	15
	1		5		28	0	50
	0		1		4	0	109
	4		8		1	0	29
	7		11		16	4	14
	16		5		28	0	15
	1		3		1	0	10
	34		12		40	0	95
	2		4		24	0	51
	18		6		16	0	21
	1		7		45	0	12
	7		11		43	0	29
	8		2		22	0	25
	23		17		18	0	44
	17		6		53	0	15
	5		1		41	0	131
	8		6		32	0	50
	0		3		11	0	29
	10		6		21	0	19
	2		2		638	0	16
	2		3		61	0	28
	19		9		31	0	11
	10		10		87	0	72
	13		9		17	0	31
	6		2		215	0	38
	12		7		21	0	19
					8	0	20
					35	0	13
					27	0	25
					40	0	91
					60	0	21
					68	0	34
					31	0	32
					20	0	10
					54	0	10
					146	0	12
					45	0	64
					72	0	43
					51	3	45
					4	0	56
					9	0	14
					175	0	10
					42	0	45
					47	0	45
					236	0	17
					39	0	12
					30	0	23
					25	1	26
					9	0	33
					10	0	35
						0	16
						0	28
						0	13
						0	28
						0	38
						0	44
						0	13
						0	12
						0	98
						0	90
						0	27
						0	81
						0	74
						0	46
						0	69
						0	14
						0	23
						0	70
						0	50
						0	55
						0	11
						0	30
						0	70
						1	105
						0	53
						0	28
						0	50
						0	41
						0	60
							74
							13
							13
							16
							15
							37
							21
							40
							81
							50
							50
							59
							9
							53
							31
							77
							13
							32
							87
							10
							44
							38
							9
							14
							95
							12
							23
							18
							17
							21
							11
							67
							64
							37
							18
							17
							29
							0
							0
							4
							58
							7
							17
							1
							11
							22
							5
							18
							11
							1
							56
							21
							14
							8
							5
							7
							18
							10
							19
							25
							0
							13
							4
							10
							12
							16
							4
							16
							0
							6
							3
							7
							2
							16
							7
							6
							17
							21
							22
							13
							12
							10
							25
							29
							8
							7
							13
							30
							37
							31
							9
							26
							8
							24
							14
							15
							17
							23
							10
							9
							0
							15
							1
							5
							4
							4
							8
							16
							14
							20
							24
							21
							3
							4
							3
							6
							15
							6
							7
							30
							11
							1
							8
							5
							3
							8
							4
							5
							6
							7
							11
							2
							17
							6
							6
							8
							1
							2
							9
							7
							19
							1
							7
							11
