# Supplementary material for: Dopaminergic regulation of vestibulo-cerebellar circuits through unipolar brush cells
Source: eLife journal article supplement (doi:10.7554/elife.76912), 2022-04-27
Supplement: supp [file elife-76912-supp-v1.zip › elife_poa_e76912_Figure_4_source_data_1.xlsx]

## Sheet: Fig 4D
Mouse		Golgi	CbN	VN	Pkj	UBC	LC	Starter Cell	PCG
1		48	69	49	31	21	3	35	1
2		42	41	20	27	31	4	38	2
3		51	47	30	36	29	2	39
4		28	32	24	12	19	1	22	3

## Sheet: Fig 4E
Mouse	Golgi	CbN	VN	Pkj	UBC	LC	PCG
1	1.37143	1.97143	1.4	0.885714	0.6	0.085714	0.028571
2	1.2	1.17143	0.571429	0.771429	0.885714	0.114286	0.057143
3	1.45714	1.34286	0.857143	1.02857	0.828571	0.057143	0
4	0.8	0.914286	0.685714	0.342857	0.542857	0.028571	0.085714
1
2
3
4
