# Supplementary material for: Dopaminergic regulation of vestibulo-cerebellar circuits through unipolar brush cells
Source: eLife journal article supplement (doi:10.7554/elife.76912), 2022-04-27
Supplement: supp [file elife-76912-supp-v1.zip › elife_poa_e76912_Figure_5_figure_supplement_1_source_data_1.xlsx]

## Sheet: Fig 5_S1B
GRABDA delta F/F peak
	Quinpirole
	1.2527
	0.5168
	0.5404
	0.6497
	0.977
	1.2034
	1.0216
	0.9637
	0.118
	0.1332
