# Supplementary material for: Dopaminergic regulation of vestibulo-cerebellar circuits through unipolar brush cells
Source: eLife journal article supplement (doi:10.7554/elife.76912), 2022-04-27
Supplement: supp [file elife-76912-supp-v1.zip › elife_poa_e76912_Figure_5_source_data_1.xlsx]

## Sheet: Fig 5D
GRABDA delta F/F peak
	ACSF	1 µM L-741626
	0.05	0.02
	0.105	0.02
	0.06	0.0005
	0.0235	0.011
	0.0249	0.0119
	0.0154	0.0052
	0.0212	0.0045
	0.0781	0.0038
	0.0434	0.016
	0.0546	0.0046

## Sheet: Fig 5H
GRABDA delta F/F peak
	Response	Failure	Control
	0.1406	0.0114	0.0126
	0.1398	0.0149	0.00357738
	0.0529	0.0039	0.0086
	0.0468	0.0029	0.0011
	0.06837	0.0032	0.005

## Sheet: Fig 5 J
	Baseline	SKf 81297
	15.08	21.8267
	2.48	9.66
	3.47333	3.95333
	0.553333	1.92667
	1.57333	4.11333
	0.646667	1.46667
	0	3.41333
	19.8933	24.1733
	5.10667	7.32667
	0.526667	1.08

## Sheet: Fig 5 L
LC ChR2 stim			Drd1 Antagonist
Baseline	Opto stim		Baseline	Opto Stim
11.58	14.33		6.1667	5.8167
2.3667	2.5233		5.0733	5.2956
3.3467	4.5367		0.52	0.6178
3.3067	4.2767		1.3667	1.8133
9.5067	9.8633		16.0067	15.7733
0.5933	0.8367		2.456	2.57
0.84	3.8367
3.24	3.9833

## Sheet: Fig 5 M
Firing rate (delta)
	SKF 81297	LC ChR2	Drd1 antagonist
	6.74667	2.75	-0.35
	7.18	0.1566	0.2223
	0.48	1.19	0.0978
	1.37333	0.97	0.4466
	2.54	0.3566	-0.2334
	0.82	0.2434	0.114
	3.41333	2.9967
	4.28	0.7433
	2.22
	0.553333
