# Supplementary material for: Dopaminergic regulation of vestibulo-cerebellar circuits through unipolar brush cells
Source: eLife journal article supplement (doi:10.7554/elife.76912), 2022-04-27
Supplement: supp [file elife-76912-supp-v1.zip › elife_poa_e76912_Figure_6_source_data_1.xlsx]

## Sheet: Fig 6 C
APs in response to single pulse
	1st	25th	50th
	4	2	2
	9	4	4
	3	1	1
	5	2	2
	9	3	3
	3	2	2
	3	1	1
	4	2	2

## Sheet: Fig 6 D
FR (Hz)
	Baseline	UBC opto stim
	79.0533	93.1767
	20.2133	22.28
	10.6667	9.84
	14.32	10.7033
	20.2133	19.2633
	34.1467	39.83
	23.28	26.6633
	13.1733	16.06
	39.84	41.35
	29.8267	37.9467
	25.6267	25.2267
	26.9467	30.3267
	34.1867	36.7433
	22.6667	18.95
	31.5467	32.24
	3.86667	2.67
	12.7067	12.92
	29.0533	30.0167
	5.69333	5.47667
	8.36	7.86
	15.4267	11.0267
	25.56	21.6133
	30.4667	25.99
	54.08	57.0333
	5.62667	6.9
	20.9067	20.15
	7.16	7.98
	11.9067	14.4

## Sheet: Fig 6 I
	Z-Score	EPSC/IPSC charge
	-1.7322	0.0773629
	0.0548	0.435123
	2.9033	1.25885
	-3.2435	0.201024
	0.6078	0.390325
	2.0968	1.94321
	-0.3385	0.5207
