# Supplementary material for: Dopaminergic regulation of vestibulo-cerebellar circuits through unipolar brush cells
Source: eLife journal article supplement (doi:10.7554/elife.76912), 2022-04-27
Supplement: supp [file elife-76912-supp-v1.zip › elife_poa_e76912_Figure_7_source_data_1.xlsx]

## Sheet: Fig 7 C
Pkj Firing
Mean FR (Hz) during UBC opto stim		64	62	42.7	65.2	92.8	51.33	97.1	98.4

## Sheet: Fig 7 E
IPSC latency (ms)	3.65	8.45	4.14	18.35	35.45	5.269	4.825	4.475	10.85	4.07	6.91
PKJ 1st spike latency (ms)	1.99	2.715	3.495	8.02	3.235	2.115	4.25	2.29	1.96

## Sheet: Fig 7 G
IPSC peak amplitude (pA)
		Minutes	1	2	3	4	5	6	7	8	9	10	11	12	13	14
Cells	1		-49.2967	-64.8457	-52.4478	-50.9632	-59.303	-10.3635	-9.28281	-8.26858	-9.01564	-7.88612	-7.57806	-9.87208	-8.23954	-8.54851
	2		-167.123	-150.583	-104.286	-130.6	-157.917	-8.82956	-9.12589	-9.01656	-9.50965	-10.0605	-7.77246	-7.60837	-11.0119	-9.37579
	3		-80.5463	-45.3525	-53.8794	-59.1425	-40.8595	-10.3257	-5.4761	-7.76103	-6.68816	-6.69287	-5.05106	-7.96787	-7.43146	-8.98775
	4		-34.2698	-31.5021	-22.8842	-30.2278	-24.0502	-17.9642	-10.97	-11.8117	-14.156	0	0	0	0	0
	5		-25.4852	-12.6098	-29.7498	-21.5699	-30.9437	-26.6021	-10.1685	-9.03162	-10.7992	-8.89871	-10.0414	-7.97778	-11.1727	-9.07173
	6		-72.9111	-70.461	-91.8673	-75.6425	-71.6759	-64.4944	-15.2795	0	0	0	0	0	0	0
	7		-32.6342	-70.0855	-60.3488	-45.8674	-34.0025	-20.0031	-9.06077	-9.55209	-8.09835	-8.59633	-8.12712	-10.4201	-12.1037	-8.41706
	8		-191.534	-320.098	-266.179	-238.434	-245.584	-216.237	-15.321	-18.5136	-16.7401	0	0	0	0	0
	9		-188.469	-179.01	-136.734	-193.984	-178.853	-219.361	-15.1107	-15.833	-15.1505	-14.2906	-12.2896	0	0	0

## Sheet: Fig 7 H
IPSC peak amplitude (pA)
	ACSF	Gabazine
	-52.2584	-8.40624
	-128.634	-9.09701
	-55.1656	-6.33384
	-29.721	-12.3125
	-21.4085	-9.78788
	-74.1112	-15.2795
	-52.234	-8.68693
	-242.63	-16.8583
	-163.692	-14.5349
